# Supplementary material
Source: PubMed Central journal article supplement (PMC3539300)

# Supporting Information For: The Palladium-Catalyzed Anti-Markovnikov Hydroalkylation of Allylic Alcohol Derivatives

*Ryan J. DeLuca and Matthew S. Sigman\**

*Department of Chemistry, University of Utah, 315 S. 1400 East, Salt Lake City, UT 84112-085*

*E-mail: sigman@chem.utah.edu*

## Table of Contents

|         |                                                                  |
|---------|------------------------------------------------------------------|
| S1-S2   | General Considerations                                           |
| S2-S8   | Synthesis of Alkene Substrates                                   |
| S8      | Synthesis of Organozinc Reagents                                 |
| S8      | Optimization for the Hydroalkylation Reaction                    |
| S9-S10  | General Hydroalkylation Procedure                                |
| S10-S16 | Product Purification/Characterization data                       |
| S17-S18 | SFC Traces                                                       |
| S19     | References                                                       |
| S20-    | <sup>1</sup> H and <sup>13</sup> C NMR spectra for new compounds |

## General Considerations:

Dry dimethylacetamide (DMA) was purchased from Aldrich and stored over activated 3 Å molecular sieves (3 Å MS). 3 Å MS used in hydroalkylation reactions were powdered and activated by heating with a Bunsen burner while under vacuum. Granular Iodine was purchased from J.T. Baker. Unless otherwise noted all chemicals were purchased from Aldrich or Acros and used without further purification. All melting points are uncorrected and recorded on Thomas Hoover Unimelt capillary melting point apparatus. <sup>1</sup>H-NMR spectra were obtained at 300 MHz, 400 MHz or 500 MHz, chemical shifts are reported in ppm, and referenced to the CHCl<sub>3</sub> singlet at 7.26 ppm. <sup>13</sup>C-NMR spectra were obtained at 75MHz, 100 MHz or 126 MHz and referenced to the center peak of the CHCl<sub>3</sub> at 77.23 ppm. All multiplicities reported are apparent. The abbreviations s, d, t, quint, dd, ddd, dt,

m stand for the resonance multiplicities singlet, doublet, triplet, quintet, doublet of doublets, doublet of doublets of doublets, doublet of triplets and multiplet, respectively. Thin-layer chromatography was performed with EMD silica gel 60 F254 plates eluting with solvents indicated, visualized by a 254 nm UV lamp and stained with phosphomolybdic acid (PMA). Flash chromatography was performed using EM reagent silica 60 (230-400 mesh). GC separations were performed with an HP6890 GC with a flame ionization detector equipped with a DB-5 column using a 50:1 split. IR spectra were recorded using a Thermo Nicolet FT-IR. HRMS data were obtained on a Waters LCP Premier XE instrument by ESI/TOF. SFC (supercritical fluid chromatography) analysis was performed at 28 °C, using a Thar instrument fitted with AY-H and OD columns.

### Preparation of Substrates:

**(R)-1-phenylbut-3-en-2-ol:** This compound was prepared according to the literature procedure.<sup>1</sup> Analytical data matches the literature.

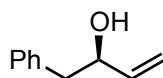

**3-methylnon-1-en-4-ol:** This compound was prepared according to the literature procedure.<sup>2,3</sup> Analytical data matches the literature.

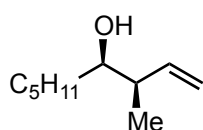

**3,3-dimethylpent-4-en-1-ol:** This compound was prepared according to the literature procedure.<sup>4-6</sup> Analytical data matches the literature.

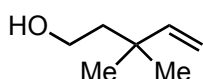

**oct-1-en-3-yl benzoate (1a):** This compound was prepared according to the literature procedure.<sup>7</sup> Analytical data matches the literature.<sup>8</sup>

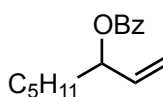

**oct-1-en-3-yl 4-methoxybenzoate (1b):** This compound was prepared according to the literature procedure.<sup>9</sup> Analytical data matches the literature.

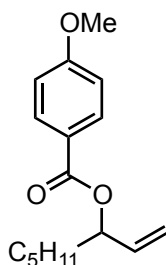

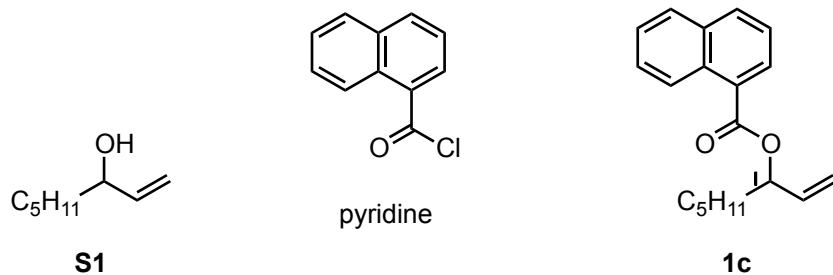

**Oct-1-en-3-yl 1-naphthoate (1c):** To a dry 25 mL round-bottom flask equipped with a stirbar under N<sub>2</sub> were added 2.3 mL of 1-octen-3-ol **S1** (15.0 mmol, 1.0 equiv.) and 4.5 mL of pyridine and the solution was cooled to 0 °C. Next, 2.5 mL of 1-naphthoic chloride (16.5 mmol, 1.1 equiv.) was added dropwise via syringe and the resulting solution was allowed to warm to room temperature and stirred overnight. The solution was then quenched with H<sub>2</sub>O (20 mL) and diluted with DCM (15 mL). The layers were separated and the organic layer was washed with H<sub>2</sub>O (20 mL). The combined aqueous layers were washed with DCM (3 × 20 mL). The combined organic layers were then washed with brine (30 mL), dried over Na<sub>2</sub>SO<sub>4</sub>, decanted, and concentrated *in vacuo*. The product was purified by silica gel flash chromatography eluting with 7% diethyl ether in hexanes to give the product as a colorless oil in 88% yield. *R<sub>f</sub>* = 0.4 (7% Et<sub>2</sub>O in hexanes). <sup>1</sup>H NMR (400 MHz, CDCl<sub>3</sub>): δ 0.93 (t, *J* = 6.8 Hz, 3H), 1.30-1.55 (m, 6H), 1.74-1.95 (m, 2H), 5.27 (d, *J* = 10.8 Hz, 1H), 5.42 (d, *J* = 17.2 Hz, 1H), 5.64 (q, *J* = 6.5 Hz, 1H), 5.99 (m, 1H), 7.49-7.57 (m, 2H), 7.60-7.66 (m, 1H), 7.89 (d, *J* = 8.4 Hz, 1H), 8.02 (d, *J* = 8.4 Hz, 1H), 8.23 (d, *J* = 7.6 Hz, 1H), 8.97 (d, *J* = 8.8 Hz, 1H). <sup>13</sup>C NMR (100 MHz, CDCl<sub>3</sub>): δ 14.2, 22.7, 25.0, 31.8, 34.6, 75.7, 117.0, 124.7, 126.0, 126.3, 127.8(2), 128.7, 130.1, 131.6, 133.4, 134.1, 136.9, 167.0. IR (neat): 2929, 2858, 1709, 1593, 1509, 1462, 1274, 1238, 1193, 1131, 1029, 927, 778, 653 cm<sup>-1</sup>. HRMS (M+Na)<sup>+</sup>: calcd. 305.1517, obsvd. 305.1519.

**oct-1-en-3-yl acetate (1d):** This compound was prepared according to the literature procedure.<sup>10</sup> Analytical data matches the literature.

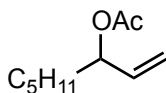

**4,4-dimethylpent-1-en-3-yl acetate (1e):** This compound was prepared according to the literature procedure.<sup>11</sup> Analytical data matches the literature.

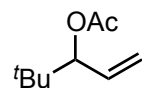

**1-cyclohexylallyl benzoate (1f):** This compound was prepared according to the literature procedure.<sup>12</sup> Analytical data matches the literature.

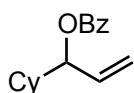

### General Procedure for Benzoyl Protection

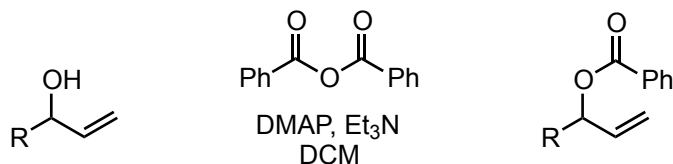

Into a dry 250 mL round-bottom flask equipped with a stirbar were added the alcohol (10.0 mmol, 1.0 equiv.), 244 mg of DMAP (2.0 mmol, 0.20 equiv.), 1.8 mL of Et<sub>3</sub>N (13.0 mmol, 1.3 equiv) and 50 mL of DCM. The flask was equipped with a septum and connected to a N<sub>2</sub> line. The resulting mixture was cooled to 0 °C, and 3.40 g of benzoic anhydride (15.0 mmol, 1.5 equiv.) was dissolved in 5 mL of DCM and added dropwise. The mixture was allowed to warm to room temperature and was stirred overnight. The solution was then washed with sat. aq. NH<sub>4</sub>Cl (50 mL) and H<sub>2</sub>O (50 mL). The combined aqueous layers were extracted with DCM (50 mL). The combined organic layers were then washed with brine (30 mL), dried over Na<sub>2</sub>SO<sub>4</sub>, decanted, and concentrated *in vacuo*. The product was purified by silica gel flash column chromatography.

**1-(benzyloxy)but-3-en-2-yl benzoate (1g):** The general procedure for benzoyl protection was followed. The product was purified by silica gel flash chromatography eluting with 10% diethyl ether in hexanes to give the product as a colorless oil in 85% yield. *R<sub>f</sub>* = 0.3 (10% EtOAc in hexanes).

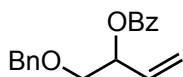

<sup>1</sup>H NMR (400 MHz, CDCl<sub>3</sub>): δ 0.73 (dd, *J* = 10.5, 4.4 Hz, 1H), 0.78 (dd, *J* = 10.5, 6.6 Hz, 1H), 4.61 (d, *J* = 12.4 Hz, 1H), 4.67 (d, *J* = 12.4 Hz, 1H), 5.33 (d, *J* = 10.8 Hz, 1H), 5.46 (d, *J* = 17.2 Hz, 1H), 5.80 (m, 1H), 6.00 (ddd, *J* = 17.1, 10.8, 6.1 Hz, 1H), 7.27-7.38 (m, 5H), 7.44-7.73 (m, 3H), 8.11-8.15 (m, 2H). <sup>13</sup>C NMR (100 MHz, CDCl<sub>3</sub>): δ 71.5, 73.3, 73.9, 118.1, 127.7, 127.8, 128.5(2), 129.8, 130.4, 133.1, 133.5, 138.1, 165.8. IR (neat): 3063, 3030, 2860, 1787, 1716, 1601, 1584, 1494, 1451, 1314, 1265, 1096, 1025, 987, 933, 736, 708, 696 cm<sup>-1</sup>. HRMS (M+Na)<sup>+</sup>: calcd. 305.1154, obsvd. 305.1156.

**1-phenylbut-3-en-2-yl benzoate (1h):** The general procedure for benzoyl protection was followed. The product was purified by silica gel flash chromatography eluting with 10% ethyl acetate in hexanes to give the product as a colorless oil in 86% yield. *R<sub>f</sub>* = 0.4 (10% EtOAc in hexanes).

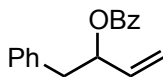

$^1\text{H}$  NMR (400 MHz,  $\text{CDCl}_3$ ):  $\delta$  3.03 (dd,  $J = 13.9, 6.2$  Hz, 1H), 3.12 (dd,  $J = 13.9, 7.2$  Hz, 1H), 5.19 (d,  $J = 10.8$  Hz, 1H), 5.29 (d,  $J = 17.2$  Hz, 1H), 5.72 (q,  $J = 6.5$  Hz, 1H), 5.92 (ddd,  $J = 17.1, 10.7, 6.3$  Hz, 1H), 7.17-7.32 (m, 5H), 7.42 (t,  $J = 7.6$  Hz, 2H), 7.54 (t,  $J = 7.2$  Hz, 1H), 8.03 (d,  $J = 6.8$  Hz, 2H).  $^{13}\text{C}$  NMR (100 MHz,  $\text{CDCl}_3$ ):  $\delta$  41.2, 75.8, 117.2, 126.7, 128.5(2), 129.7, 129.8, 130.6, 133.0, 135.9, 137.0, 165.8. IR (neat): 3062, 3029, 2923, 1714, 1601, 1451, 1264, 1108, 983, 697  $\text{cm}^{-1}$ . HRMS ( $\text{M}+\text{Na}$ ) $^+$ : calcd. 275.1048, obsvd. 275.1049.

**3-(*tert*-butoxy)oct-1-ene (10):** This compound was prepared according to the literature procedure.<sup>13</sup> The product was purified by silica gel flash chromatography

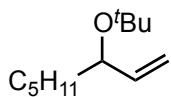

eluting with 2% diethyl ether in hexanes to give the product as a colorless oil in 63% yield.  $R_f = 0.5$  (5% EtOAc in Hexanes).  $^1\text{H}$  NMR (400 MHz,  $\text{CDCl}_3$ ):  $\delta$  0.87 (t,  $J = 7.0$  Hz, 3H), 1.17 (s, 9H), 1.21-1.52 (m, 8H), 3.87 (q,  $J = 6.3$  Hz, 1H), 4.99 (d,  $J = 10.8$  Hz, 1H), 5.09 (d,  $J = 17.2$  Hz, 1H), 5.80 (ddd,  $J = 17.2, 10.5, 6.6$  Hz, 1H).  $^{13}\text{C}$  NMR (100 MHz,  $\text{CDCl}_3$ ):  $\delta$  14.3, 22.9, 25.6, 28.9, 32.1, 37.6, 73.4, 74.0, 113.5, 143.1. IR (neat): 3734, 3076, 2959, 2931, 2860, 1733, 1464, 1388, 1195, 1054, 915, 681  $\text{cm}^{-1}$ . HRMS ( $\text{M}+\text{H}$ ) $^+$ : calcd. 185.1905, obsvd. 185.1911.

**pent-4-en-2-yl benzoate (3a):** This compound was prepared according to the literature procedure.<sup>14</sup> Analytical data matches the literature.

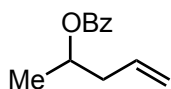

**3-methylnon-1-en-4-yl benzoate (5a):** The general procedure for benzoyl protection was

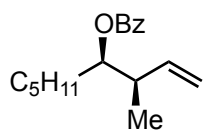

followed. The product was purified by silica gel flash chromatography eluting with 5% ethyl acetate in hexanes to give the product as a colorless oil in 85% yield.  $R_f = 0.3$  (5% EtOAc in hexanes).  $^1\text{H}$  NMR (400 MHz,  $\text{CDCl}_3$ ):  $\delta$  0.86 (t,  $J = 7.0$  Hz, 3H), 1.09 (d,  $J = 7.2$  Hz, 3H), 1.22-1.43 (m, 6H), 1.66 (q,  $J = 7.2$  Hz, 2H), 2.50-2.60 (m, 1H), 5.02-5.16 (m, 3H), 5.83 (ddd,  $J = 17.4, 10.2, 7.4$  Hz, 1H), 7.42-7.47 (m, 2H), 7.53-7.58 (m, 1H), 8.03-8.08 (m, 2H).  $^{13}\text{C}$  NMR (100 MHz,  $\text{CDCl}_3$ ):  $\delta$  14.2, 15.5, 22.7, 25.4, 31.7, 31.9, 41.8, 77.7, 115.4, 128.5, 129.8, 130.9, 132.9, 140.2, 166.5. IR (neat): 2931, 2860, 1715, 1451, 1268, 1108, 1069, 707, 1105  $\text{cm}^{-1}$ . HRMS ( $\text{M}+\text{Na}$ ) $^+$ : calcd. 283.1674, obsvd. 283.1682.

## Substrate Procedure A

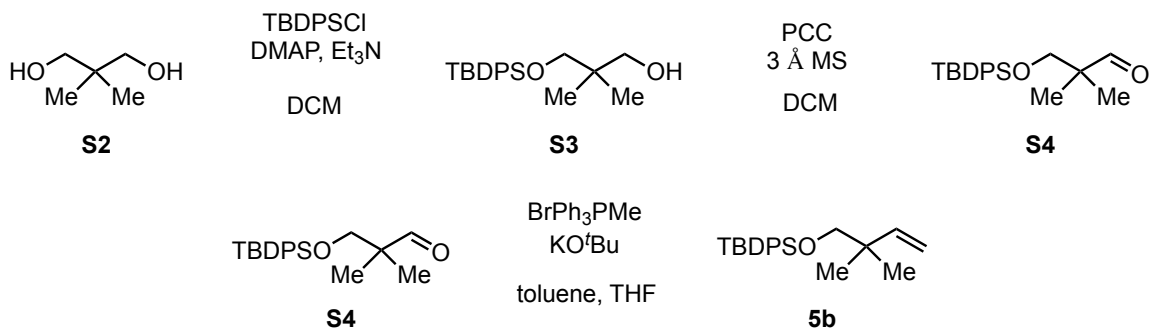

Into a dry 250 mL round-bottom flask equipped with a stirbar were added 4.00 g of 2,2-dimethylpropane-1,3-diol **S2** (38.4 mmol, 3.0 equiv.), 280 mg of DMAP (2.50 mmol, 0.20 equiv.), 2.4 mL of Et<sub>3</sub>N (17.2 mmol, 1.3 equiv), and 60 mL of DCM. The flask was equipped with a septum and connected to a N<sub>2</sub> line. The resulting mixture was cooled to 0° C, and 3.2 mL of TBDPSCl (13.0 mmol, 1.0 equiv.) was added dropwise. The mixture was allowed to warm to room temperature and was allowed to stir overnight. The solution was then washed with sat. aq. NH<sub>4</sub>Cl (50 mL) and H<sub>2</sub>O (50 mL). The combined aqueous layers were extracted with DCM (50 mL). The combined organic layers were then washed with brine (30 mL), dried over Na<sub>2</sub>SO<sub>4</sub>, decanted, and concentrated *in vacuo*. The product was purified by silica gel flash column chromatography to give 2.89 g of product in 65% yield.<sup>15</sup>

Into a dry 100 mL round-bottom flask equipped with a stirbar were added 2.20 g of pyridinium chlorochromate (PCC) (10.0 mmol, 1.5 equiv.), 500 mg of powdered 3 Å molecular sieves, and 30 mL of DCM. To this mixture was then added 2.28 g of 3-((*tert*-butyldiphenylsilyloxy)-2,2-dimethylpropan-1-ol **S3** (6.67 mmol, 1.0 equiv.) and the reaction stirred for 30 min. The reaction was passed through a small plug of silica resulting in 1.93 g of aldehyde product in 85% yield, which was used immediately in the next step.<sup>15</sup>

To a dry 100 mL round-bottomed flask equipped with a stirbar under N<sub>2</sub> were added 1.57 g of methyltriphenylphosphonium bromide (4.40 mmol, 1.2 equiv.) and 20 mL of toluene. To this solution, 494 mg of KO<sup>t</sup>Bu (4.40 mmol, 1.2 equiv.) in 3.0 mL of THF was added dropwise via a syringe. The reaction mixture was stirred for 4 h. The mixture was cooled to -78° C and 1.25 g of 3-((*tert*-butyldiphenylsilyloxy)-2,2-dimethylpropanal **S4** (3.67 mmol, 1.0 equiv.) was added dropwise. The mixture was allowed to warm to room temperature and was stirred for 1 h. Upon completion by TLC analysis, the reaction was quenched with 10 mL of sat. aq. NH<sub>4</sub>Cl. The mixture was diluted with diethyl ether (50 mL) and washed with H<sub>2</sub>O (2 × 10 mL) and brine (20 mL). The organic layer was dried over Na<sub>2</sub>SO<sub>4</sub>, decanted, and concentrated *in vacuo*. The crude reaction mixture was purified by silica gel flash column chromatography.

**tert-butyl((2,2-dimethylbut-3-en-1-yl)oxy)diphenylsilane (5b):** This compound was

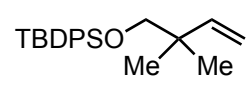 prepared using substrate procedure A. The product was purified by silica gel flash chromatography eluting with 2% ethyl acetate in hexanes to give the product as a colorless oil in 90% yield.  $R_f = 0.7$  (5% EtOAc in hexanes).  $^1\text{H NMR}$  (400 MHz,  $\text{CDCl}_3$ ):  $\delta$  1.10 (s, 6H), 1.12 (s, 9H), 3.44 (s, 2H), 5.00-5.09 (m, 2H), 5.94 (dd,  $J = 17.6, 10.8$  Hz, 1H), 7.40-7.49 (m, 6H), 7.70-7.75 (m, 4H).  $^{13}\text{C NMR}$  (100 MHz,  $\text{CDCl}_3$ ):  $\delta$  19.7, 24.0, 27.1, 39.5, 72.7, 111.9, 127.8, 129.8, 134.1, 136.0, 146.2. IR (neat): 3071, 2959, 2930, 2857, 1472, 1471, 1427, 1360, 1105, 1089, 908, 733, 699, 612  $\text{cm}^{-1}$ . HRMS ( $\text{M}+\text{H}^+$ ): calcd. 339.2144, obsvd. 339.2143.

**2,2-dimethylbut-3-en-1-yl benzoate (5c):** This compound was prepared using substrate

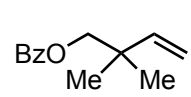 procedure A with the modification that the alcohol was protected using benzoic anhydride instead of TBDPSCl.<sup>16</sup> The product was purified by silica gel flash chromatography eluting with 10% ethyl acetate in hexanes to give the product as a colorless oil in 91% yield.  $R_f = 0.3$  (10% EtOAc in hexanes).  $^1\text{H NMR}$  (500 MHz,  $\text{CDCl}_3$ ):  $\delta$  1.15 (s, 6H), 4.11 (s, 2H), 5.05 (dd,  $J = 10.8, 1.2$  Hz, 1H), 5.10 (dd,  $J = 17.5, 1.2$  Hz, 1H), 5.90 (dd,  $J = 17.5, 10.8$  Hz, 1H), 7.42-7.45 (m, 2H), 7.53-7.56 (m, 1H), 8.04-8.07 (m, 2H).  $^{13}\text{C NMR}$  (125 MHz,  $\text{CDCl}_3$ ):  $\delta$  24.2, 37.7, 72.6, 112.7, 128.5, 129.7, 130.6, 133.0, 144.7, 166.6. IR (neat): 2966, 1717, 1644, 1601, 1452, 1365, 1314, 1267, 1175, 1109, 1026, 706, 686, 671  $\text{cm}^{-1}$ . HRMS ( $\text{M}+\text{H}^+$ ): calcd. 205.1229, obsvd. 205.1232.

**3,3-dimethylpent-4-en-1-yl benzoate (5d):** The general procedure for benzoyl

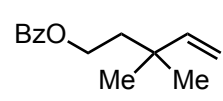 protection was followed. The product was purified by silica gel flash chromatography eluting with 5% ethyl acetate in hexanes to give the product as a colorless oil in 98% yield.  $R_f = 0.6$  (10% EtOAc in hexanes).  $^1\text{H NMR}$  (300 MHz,  $\text{CDCl}_3$ ):  $\delta$  1.10 (s, 6H), 1.81 (t,  $J = 7.2$  Hz, 2H), 4.32 (t,  $J = 7.3$  Hz, 2H), 4.95-5.02 (m, 2H), 5.83 (dd,  $J = 17.6, 10.9$  Hz, 1H), 7.41-7.48 (m, 2H), 7.52-7.59 (m, 1H), 8.00-8.05 (m, 2H).  $^{13}\text{C NMR}$  (100 MHz,  $\text{CDCl}_3$ ):  $\delta$  27.3, 36.0, 40.8, 62.7, 111.4, 128.5, 129.7, 130.7, 133.0, 147.5, 173.2. IR (neat): 2962, 1715, 1602, 1451, 1268, 1109, 1069, 912, 707  $\text{cm}^{-1}$ . HRMS ( $\text{M}+\text{H}^+$ ): calcd. 219.1385, obsvd. 219.1388.

**(R)-1-phenylbut-3-en-2-yl benzoate:** The general procedure for benzoyl protection was

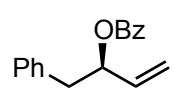 followed. The product was purified by silica gel flash chromatography eluting with 10% ethyl acetate in hexanes to give the product as a colorless oil in 86% yield.  $R_f = 0.4$  (10% EtOAc in hexanes).  $^1\text{H NMR}$  (400 MHz,  $\text{CDCl}_3$ ):  $\delta$  3.03 (dd,  $J = 13.9, 6.2$  Hz, 1H), 3.12 (dd,  $J = 13.9, 7.2$  Hz, 1H),

5.19 (d,  $J = 10.8$  Hz, 1H), 5.29 (d,  $J = 17.2$  Hz, 1H), 5.72 (q,  $J = 6.5$  Hz, 1H), 5.92 (ddd,  $J = 17.1, 10.7, 6.3$  Hz, 1H), 7.17-7.32 (m, 5H), 7.42 (t,  $J = 7.6$  Hz, 2H), 7.54 (t,  $J = 7.2$  Hz, 1H), 8.03 (d,  $J = 6.8$  Hz, 2H).  $^{13}\text{C}$  NMR (100 MHz,  $\text{CDCl}_3$ ):  $\delta$  41.2, 75.8, 117.2, 126.7, 128.5(2), 129.7, 129.8, 130.6, 133.0, 135.9, 137.0, 165.8. IR (neat): 3062, 3029, 2923, 1714, 1601, 1451, 1264, 1108, 983, 697  $\text{cm}^{-1}$ . HRMS ( $\text{M}+\text{Na}^+$ ): calcd. 275.1048, obsvd. 275.1049.

**General Procedure for the Synthesis of Organozinc Reagents:** A 25-mL round-bottomed flask was charged with 0.98 g of zinc powder (15.00 mmol, 1.50 equiv.) and heated to 80 °C under high vacuum for 3 hours. After back-filling with argon, DMA (to give a total volume of 10 mL) and then 76.1 mg of iodine (0.30 mmol, 0.03 equiv.) were added. After the red color of iodine had faded (usually 3-5 minutes), the freshly distilled alkyl halide (10.00 mmol) was added. The colorless reaction mixture was stirred for 16 hours at 80 °C (the disappearance of the alkyl halide and the formation of the organozinc reagent can be monitored by  $^1\text{H}$  NMR). The gray solution (~1.0 M) was transferred into a dry Schlenk flask via cannula. These organozinc solutions can be stored at room temperature under a dry atmosphere for several weeks without deterioration.<sup>17,18</sup>

### Optimization for the Hydroalkylation Reaction:

The general procedure A described below was used with the following modifications. The reaction was performed on 0.10 mmol scale with ~10 wt% undecane used as an internal standard. After 3 h aliquots (~50  $\mu\text{L}$ ) were taken, passed through a small silica pipet with ethyl acetate and analyzed for conversion and product formation by gas chromatography. The modifications described below were applied in order to optimize the reaction.

### Modifications:

| entry    | x        | temp.       | additive | % yield <sup>[a]</sup> |
|----------|----------|-------------|----------|------------------------|
| 1        | 6        | 0 °C        | 3 Å MS   | 69                     |
| 2        | 7        | 0 °C        | 3 Å MS   | 74                     |
| <b>3</b> | <b>7</b> | <b>0 °C</b> | --       | <b>79</b>              |
| 4        | 7        | RT          | --       | 54                     |
| 5        | 7        | -10 °C      | --       | 61                     |



### General Procedure A for the Hydroalkylation of Protected Alcohols:

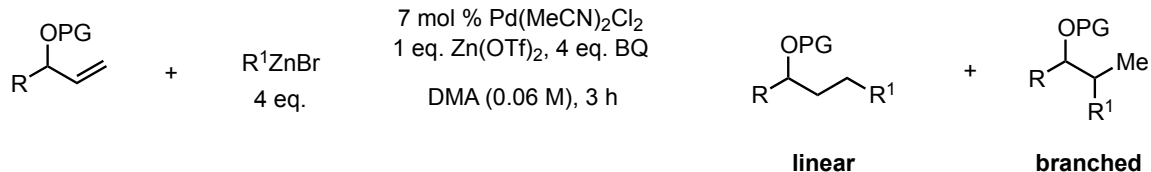

Into a 25 mL round-bottom flask equipped with a stirbar were added 9 mg of  $\text{Pd}(\text{MeCN})_2\text{Cl}_2$  (0.035 mmol, 0.07 equiv.), 216 mg of benzoquinone (2.0 mmol, 4.0 equiv.) and 182 mg of  $\text{Zn}(\text{OTf})_2$  (0.5 mmol, 1.0 equiv.). The flask was equipped with a rubber septum and argon line and the system was flushed with argon for 15 minutes. Dry DMA (6.0 mL) was then added to the reaction flask using a syringe. The substrate (0.5 mmol, 1.0 equiv.) was then added to the flask via a syringe. The flask was placed in an ice-water bath. The solution was stirred for 5 minutes, after which time 2.0 mL of alkylzinc bromide (2.0 mmol, 4.0 equiv.) was then added dropwise to the cooled solution. The reaction mixture was then stirred for 3 hours at 0 °C.

After this time, the reaction was diluted with diethyl ether (100 mL) and filtered through celite. The filtrate was transferred to a separatory funnel and washed with saturated  $\text{NH}_4\text{Cl}$  (30 mL). The organic layer was separated and washed with  $\text{H}_2\text{O}$  (2 x 30 mL) followed by brine (10 mL). The organic layer was then dried over anhydrous  $\text{Na}_2\text{SO}_4$ . After filtration, the solvents were removed via *in vacuo* rotary evaporation. The product was purified by silica gel flash chromatography.

### General Procedure B for the Hydroalkylation of Protected Alcohols:

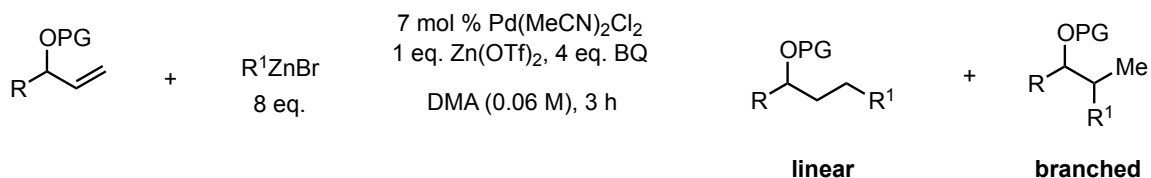

Into a 25 mL round-bottom flask equipped with a stirbar were added 9 mg of  $\text{Pd}(\text{MeCN})_2\text{Cl}_2$  (0.035 mmol, 0.07 equiv.), 216 mg of benzoquinone (2.0 mmol, 4.0 equiv.) and 182 mg of  $\text{Zn}(\text{OTf})_2$  (0.5 mmol, 1.0 equiv.). The flask was equipped with a rubber septum and argon line and the system was flushed with argon for 15 minutes. Dry DMA (4.0 mL) was then added to the reaction flask using a syringe. The substrate (0.5 mmol, 1.0 equiv.) was then added to the flask via a syringe. The flask was placed in an ice-water bath. The solution was stirred for 5 minutes, after which time 4.0 mL of

alkylzinc bromide (4.0 mmol, 8.0 equiv.) was then added dropwise to the cooled solution. The reaction mixture was then stirred for 3 hours at 0 °C.

After this time, the reaction was diluted with diethyl ether (100 mL) and filtered through celite. The filtrate was transferred to a separatory funnel and washed with saturated NH<sub>4</sub>Cl (30 mL). The organic layer was separated and washed with H<sub>2</sub>O (2 x 30 mL) followed by brine (10 mL). The organic layer was then dried over anhydrous Na<sub>2</sub>SO<sub>4</sub>. After filtration, the solvents were removed via *in vacuo* rotary evaporation. The product was purified by silica gel flash chromatography.

### Product Purification/Characterization data:

**Table 2, entry 1 (dodecan-6-yl benzoate) (2a).** The general procedure A was used. The product was purified by silica gel flash chromatography eluting with 5% ethyl acetate in hexanes to give the product as a slightly yellow oil in 73% yield, >20:1 (linear:branched).  $R_f = 0.5$  (10% EtOAc in hexanes). <sup>1</sup>H NMR (300 MHz, CDCl<sub>3</sub>): δ 0.87 (m, 6H), 1.18-1.43 (m, 14H), 1.66 (m, 4H), 5.13 (quint,  $J = 6.2$  Hz, 1H), 7.40-7.59 (m, 3H), 8.03-8.08 (m, 2H). <sup>13</sup>C NMR (75 MHz, CDCl<sub>3</sub>): δ 14.2, 14.3, 22.8(2), 25.2, 25.5, 29.5, 32.0(2), 34.4(2), 75.3, 128.5, 129.7, 131.1, 132.9, 166.6. IR (neat): 2927, 2858, 1715, 1451, 1269, 1109, 1026, 708, 669 cm<sup>-1</sup>. HRMS (M+Na)<sup>+</sup>: calcd. 313.2144, obsvd. 313.2139.

**Table 2, entry 2 (dodecan-6-yl 4-methoxybenzoate) (2b).** The general procedure A was used. The product was purified by silica gel flash chromatography eluting with 10% diethyl ether in hexanes to give the product as a colorless oil in 72% yield, >20:1 (linear:branched).  $R_f = 0.4$  (10% Et<sub>2</sub>O in hexanes). <sup>1</sup>H NMR (400 MHz, CDCl<sub>3</sub>): δ 0.83-0.89 (m, 6H), 1.21-1.43 (m, 14H), 1.57-1.71 (m, 4H), 3.85 (s, 3H), 5.07-5.12 (m, 1H), 6.91 (d,  $J = 8.5$  Hz, 2H), 8.00 (d,  $J = 9$  Hz, 2H). <sup>13</sup>C NMR (125 MHz, CDCl<sub>3</sub>): δ 14.2, 14.3, 22.8(2), 25.2, 25.6, 29.5, 31.9, 32.0, 34.4, 34.5, 55.6, 74.9, 113.7, 123.6, 131.7, 163.4, 166.3. IR (neat): 2929, 2858, 1705, 1606, 1510, 1253, 1166, 1111, 1032, 846, 731 cm<sup>-1</sup>. HRMS (M+Na)<sup>+</sup>: calcd. 343.2249, obsvd. 343.2251.

**Table 2, entry 3 (dodecan-6-yl 1-naphthoate) (2c).** The general procedure A was used. The product was purified by silica gel flash chromatography eluting with 5% ethyl acetate in hexanes to give the product as a

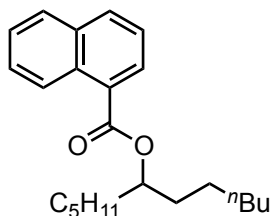

colorless oil in 65% yield, >20:1 (linear:branched).  $R_f = 0.5$  (5% EtOAc in hexanes).  $^1\text{H}$  NMR (500 MHz,  $\text{CDCl}_3$ ):  $\delta$  0.85-0.94 (m, 6H), 1.24-1.52 (m, 14H), 1.66-1.82 (m, 4H), 5.24-5.31 (m, 1H), 7.48-7.56 (m, 2H), 7.59-7.64 (m, 1H), 7.89 (d,  $J = 8.2$  Hz, 1H), 8.01 (d,  $J = 8.2$  Hz, 1H), 8.16 (d,  $J = 8.0$  Hz, 1H), 8.92 (d,  $J = 8.6$  Hz, 1H).  $^{13}\text{C}$  NMR (125 MHz,  $\text{CDCl}_3$ ):  $\delta$  14.2, 14.3, 22.7, 22.8, 25.3, 25.7, 29.5, 32.0(2), 34.5(2), 75.4, 124.7, 126.1, 126.3, 127.8, 128.3, 128.7, 129.9, 131.6, 133.1, 134.0, 167.6. IR (neat): 2953, 2927, 2857, 1709, 1509, 1460, 1275, 1238, 1194, 1135, 1003, 779  $\text{cm}^{-1}$ . HRMS ( $\text{M}+\text{Na}$ ) $^+$ : calcd. 363.2300, obsvd. 363.2306.

**Table 2, entry 4 (dodecan-6-yl acetate) (2d).** The general procedure A was used. The

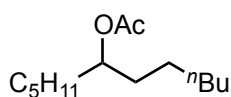

product was purified by silica gel flash chromatography eluting with 5% ethyl acetate in hexanes to give the product as a colorless oil in 47% yield, >20:1 (linear:branched).  $R_f = 0.3$  (5% EtOAc in hexanes).  $^1\text{H}$  NMR (500 MHz,  $\text{CDCl}_3$ ):  $\delta$  0.77-0.90 (m, 6H), 1.16-1.55 (m, 18H), 2.03 (s, 3H), 4.79-4.89 (m, 1H).  $^{13}\text{C}$  NMR (125 MHz,  $\text{CDCl}_3$ ):  $\delta$  14.2, 14.3, 21.5, 22.7, 22.8, 25.2, 25.5, 29.4, 31.9, 32.0, 34.2, 34.3, 74.7, 171.1. IR (neat): 2927, 2858, 1736, 1458, 1371, 1237, 1123, 1019, 725, 608  $\text{cm}^{-1}$ . HRMS ( $\text{M}+\text{Na}$ ) $^+$ : calcd. 251.1987, obsvd. 251.1993.

**Table 2, entry 5 (2,2-dimethylnonan-3-yl acetate) (2e).** The general procedure A was used. The product was purified by silica gel flash chromatography

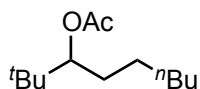

eluting with 5% ethyl acetate in hexanes to give the product as a colorless oil in 46% yield, >20:1 (linear:branched).  $R_f = 0.4$  (5% EtOAc in hexanes).  $^1\text{H}$  NMR (300 MHz,  $\text{CDCl}_3$ ):  $\delta$  0.83-0.90 (m, 12H), 1.17-1.55 (m, 10H), 2.05 (s, 3H), 4.71 (dd,  $J = 10.3, 2.6$  Hz, 1H).  $^{13}\text{C}$  NMR (75 MHz,  $\text{CDCl}_3$ ):  $\delta$  14.3, 21.3, 22.8, 26.1, 26.6, 29.5, 29.8, 32.0, 34.7, 81.1, 171.4. IR (neat): 2955, 2925, 2857, 1736, 1466, 1369, 1239, 1018, 961, 604  $\text{cm}^{-1}$ . HRMS ( $\text{M}+\text{Na}$ ) $^+$ : calcd. 237.1831, obsvd. 237.1826.

**Table 2, entry 6 (1-cyclohexylheptyl benzoate) (2f).** The general procedure A was used.

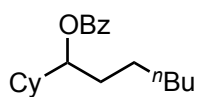

The product was purified by silica gel flash chromatography eluting with 2% diethyl ether in hexanes to give the product as a colorless oil in 72% yield, >20:1 (linear:branched).  $R_f = 0.3$  (2% Et<sub>2</sub>O in Hexanes).  $^1\text{H}$  NMR (300 MHz,  $\text{CDCl}_3$ ):  $\delta$  0.85 (t,  $J = 6.8$  Hz, 3H), 1.04-1.40 (m, 13H), 1.56-1.84 (m, 8H), 5.00 (q,  $J = 6.1$  Hz, 1H), 7.40-7.47 (m, 2H), 7.52-7.58 (m, 1H), 8.03-8.08 (m, 2H).  $^{13}\text{C}$  NMR (75 MHz,  $\text{CDCl}_3$ ):  $\delta$  14.2, 22.8, 25.7, 26.3, 26.4, 26.6, 28.3, 29.4, 29.5, 31.5, 31.9, 41.6, 78.8, 128.5, 129.8, 131.0, 132.9, 166.6. IR (neat): 2924, 2852, 1714, 1449, 1267, 1110, 1068, 707  $\text{cm}^{-1}$ . HRMS ( $\text{M}+\text{Na}$ ) $^+$ : calcd. 325.2144, obsvd. 325.2148.

**Table 2, entry 7 (1-(benzyloxy)octan-2-yl benzoate) (2g).** The general procedure A was

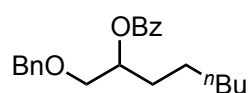

used. The product was purified by silica gel flash chromatography eluting with 10% diethyl ether in hexanes to give the product as a colorless oil in 78% yield, >20:1 (linear:branched).  $R_f = 0.4$  (10% Et<sub>2</sub>O in hexanes). <sup>1</sup>H NMR (300 MHz, CDCl<sub>3</sub>):  $\delta$  0.86 (t,  $J = 6.8$  Hz, 3H), 1.17-1.40 (m, 8H), 1.75 (q,  $J = 7.4$  Hz, 2H), 3.59-3.69 (m, 2H), 4.53 (d,  $J = 12.3$  Hz, 1H), 4.61 (d,  $J = 12.0$  Hz, 1H), 5.31 (m, 1H), 7.24-7.33 (m, 5H), 7.41-7.48 (m, 2H), 7.53-7.60 (m, 1H), 8.04-8.10 (m, 2H). <sup>13</sup>C NMR (125 MHz, CDCl<sub>3</sub>):  $\delta$  14.3, 22.8, 25.5, 29.4, 31.2, 31.9, 71.4, 73.3, 73.7, 127.8, 128.4, 128.5, 129.9, 130.8, 133.0, 138.4, 166.4. IR (neat): 2926, 2856, 1714, 1601, 1451, 1268, 1097, 709 cm<sup>-1</sup>. HRMS (M+H)<sup>+</sup>: calcd. 341.2117, obsvd. 341.2119.

**Table 2, entry 8 (1-phenyloctan-2-yl benzoate) (2h).** The general procedure A was

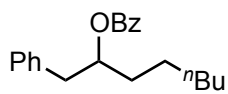

used. The product was purified by silica gel flash chromatography eluting with 10% diethyl ether in hexanes to give the product as a colorless oil in 67% yield, >20:1 (linear:branched).  $R_f = 0.3$  (10% Et<sub>2</sub>O in hexanes). <sup>1</sup>H NMR (400 MHz, CDCl<sub>3</sub>):  $\delta$  0.82-0.90 (m, 3H), 1.17-1.49 (m, 8H), 1.61-1.76 (m, 2H), 2.95 (dd,  $J = 14.0, 6.2$  Hz, 1H), 3.05 (dd,  $J = 13.6, 6.2$  Hz, 1H), 5.34 (quint,  $J = 6.2$  Hz, 1H), 7.17-7.32 (m, 5H), 7.40-7.59 (m, 3H), 8.03 (d,  $J = 7.2$  Hz, 2H). <sup>13</sup>C NMR (100 MHz, CDCl<sub>3</sub>):  $\delta$  14.2, 22.8, 25.6, 29.3, 31.9, 33.7, 40.8, 75.7, 126.6, 128.5(2), 129.7, 130.9, 132.9, 137.8, 166.3. IR (neat): 2926, 2856, 1713, 1450, 1268, 1109, 1068, 1068, 1025, 708, 698 cm<sup>-1</sup>. HRMS (M+Na)<sup>+</sup>: calcd. 333.1831, obsvd. 333.1830.

**Table 2, entry 9 (14-chlorotetradecan-6-yl benzoate) (2i).** The general procedure B

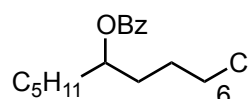

was used. The product was purified by silica gel flash chromatography eluting with 5% ethyl acetate in hexanes to give the product as a slightly yellow oil in 63% yield, >20:1 (linear:branched).  $R_f = 0.3$  (5% EtOAc in hexanes). <sup>1</sup>H NMR (500 MHz, CDCl<sub>3</sub>):  $\delta$  0.87 (t,  $J = 7.0$  Hz, 3H), 1.23-1.44 (m, 16H), 1.59-1.78 (m, 6H), 3.50 (t,  $J = 6.8$  Hz, 2H), 5.10-5.16 (m, 1H), 7.44 (t,  $J = 7.8$  Hz, 2H), 7.52-7.56 (m, 1H), 8.05 (d,  $J = 7.0$  Hz, 2H). <sup>13</sup>C NMR (125 MHz, CDCl<sub>3</sub>):  $\delta$  14.2, 22.7, 25.2, 25.5, 27.0, 28.9, 29.5, 29.6, 32.0, 32.8, 34.4, 45.3, 75.2, 76.4, 128.5, 129.7, 131.1, 132.8, 166.5. IR (neat): 2928, 2856, 1713, 1450, 1270, 1109, 709 cm<sup>-1</sup>. HRMS (M+Na)<sup>+</sup>: calcd. 375.2067, obsvd. 375.2073.

**Table 2, entry 10 (1-cyclohexylnonan-4-yl 1-naphthoate) (2j).** The general procedure

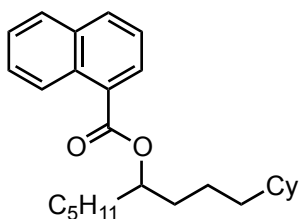

A was used. The product was purified by silica gel flash chromatography eluting with 5% diethyl ether in hexanes to give the product as a colorless oil in 63% yield, >20:1 (linear:branched).  $R_f = 0.7$  (10% Et<sub>2</sub>O in hexanes). <sup>1</sup>H NMR (300 MHz, CDCl<sub>3</sub>):  $\delta$  0.77-0.94 (m, 5H), 1.08-1.80 (s, 22H), 5.20-5.31 (m, 1H), 7.46-7.63 (m, 3H), 7.88 (d,  $J = 8.0$  Hz, 1H), 8.01 (d,  $J = 8.0$  Hz, 1H), 8.14 (dd,  $J = 7.4, 1.3$  Hz, 1H), 8.89 (d,  $J = 8.7$  Hz, 1H). <sup>13</sup>C NMR (125 MHz, CDCl<sub>3</sub>):  $\delta$  14.2, 22.8, 22.9, 25.4, 26.6, 26.9, 30.5, 32.0, 33.6(2), 34.5, 34.8, 37.6, 37.8, 75.4, 124.7, 126.0, 126.3, 127.8, 128.3, 128.7, 129.8, 131.6, 133.1, 134.0, 167.7. IR (neat): 2920, 2849, 1709, 1509, 1447, 1275, 1238, 1195, 1133, 1003, 779 cm<sup>-1</sup>. HRMS (M+Na)<sup>+</sup>: calcd. 403.2613, obsvd. 403.2619.

**Table 2, entry 11 (14-(pivaloyloxy)tetradecan-6-yl 1-naphthoate) (2k).** The general

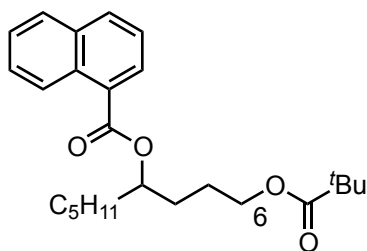

procedure A was used. The product was purified by silica gel flash chromatography eluting with 5% ethyl acetate in hexanes to give the product as a colorless oil in 61% yield, >20:1 (linear:branched).  $R_f = 0.2$  (5% EtOAc in hexanes). <sup>1</sup>H NMR (300 MHz, CDCl<sub>3</sub>):  $\delta$  0.88 (t,  $J = 7.2$  Hz, 3H), 1.18 (s, 9H), 1.25-1.49 (m, 16H), 1.55-1.81 (m, 6H), 4.02 (t,  $J = 6.6$  Hz, 2H), 5.21-5.29 (m, 1H), 7.46-7.63 (m, 3H), 7.88 (d,  $J = 8.0$  Hz, 1H), 8.01 (d,  $J = 8.0$  Hz, 1H), 8.14 (dd,  $J = 7.4, 1.3$  Hz, 1H), 8.89 (d,  $J = 8.7$  Hz, 1H). <sup>13</sup>C NMR (100 MHz, CDCl<sub>3</sub>):  $\delta$  14.2, 22.8, 25.4, 25.7, 26.1, 27.4, 28.8, 29.4, 29.6, 29.7, 30.5, 32.0, 34.5, 38.9, 64.6, 75.3, 124.7, 126.0, 126.3, 127.8, 128.3, 128.7, 129.9, 131.6, 133.2, 134.1, 167.6, 178.8. IR (neat): 2928, 2856, 1725, 1710, 1509, 1460, 1277, 1239, 1152, 1136, 781 cm<sup>-1</sup>. HRMS (M+Na)<sup>+</sup>: calcd. 491.3137, obsvd. 491.3147.

**Table 2, entry 12 (14-((tert-butyldiphenylsilyl)oxy)tetradecan-6-yl 1-naphthoate)**

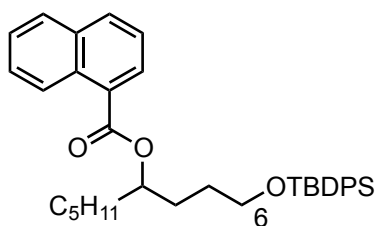

**(2l).** The general procedure B was used. The product was purified by silica gel flash chromatography eluting with 5% ethyl acetate in hexanes to give the product as a colorless oil in 76% yield, >20:1 (linear:branched).  $R_f = 0.4$  (5% EtOAc in hexanes). <sup>1</sup>H NMR (300 MHz, CDCl<sub>3</sub>):  $\delta$  0.91 (t,  $J = 7.2$  Hz, 3H), 1.07 (s, 9H), 1.23-1.61 (m, 18H), 1.67-1.98 (m, 4H), 3.66 (t,  $J = 6.5$  Hz, 2H), 5.24-5.33 (m, 1H), 7.33-7.73 (m, 13H), 7.88 (d,  $J = 8.2$  Hz, 1H), 8.01 (d,  $J = 8.4$  Hz, 1H), 8.14 (dd,  $J = 7.4, 1.3$  Hz, 1H), 8.89 (d,  $J = 8.7$  Hz, 1H). <sup>13</sup>C NMR (75 MHz, CDCl<sub>3</sub>):  $\delta$

14.3, 19.4, 22.8, 25.4, 25.7, 25.9, 27.1 29.5, 29.7, 29.8, 31.9, 32.8, 34.5(2), 64.1, 75.3, 124.7, 126.0, 126.3, 127.8(2), 128.2, 128.7, 129.7, 129.9, 131.6, 133.2, 134.0, 134.3, 135.8, 167.6. IR (neat): 2928, 2855, 1709, 1461, 1239, 1135, 1109, 1004, 780, 737, 699, 612  $\text{cm}^{-1}$ . HRMS ( $\text{M}+\text{Na}$ )<sup>+</sup>: calcd. 645.3740, obsvd. 645.3746.

**Table 2, entry 13 (14-(benzyloxy)tetradecan-6-yl 1-naphthoate) (2m).** The general

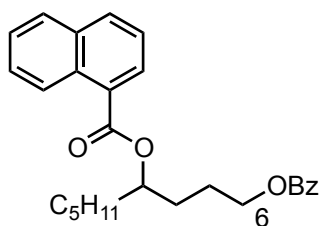

procedure B was used. The product was purified by silica gel flash chromatography eluting with 5% diethyl ether in hexanes to give the product as a colorless oil in 66% yield, >20:1 (linear:branched).  $R_f = 0.2$  (5%  $\text{Et}_2\text{O}$  in Hexanes).  $^1\text{H}$  NMR (400 MHz,  $\text{CDCl}_3$ ):  $\delta$  0.89 (t,  $J = 7.2$  Hz, 3H), 1.27-1.53 (m, 16H), 1.65-1.83 (m, 6H), 4.30 (t,  $J = 6.4$  Hz, 2H), 5.22-5.31 (m, 1H), 7.43-7.63 (m, 6H), 7.88 (d,  $J = 8.2$  Hz, 1H), 8.01-8.07 (m, 3H), 8.14 (dd,  $J = 7.4, 1.3$  Hz, 1H), 8.89 (d,  $J = 8.8$  Hz, 1H).  $^{13}\text{C}$  NMR (100 MHz,  $\text{CDCl}_3$ ):  $\delta$  14.2, 22.8, 25.3, 25.6, 26.2, 28.9, 29.4, 29.6, 29.7, 30.5, 32.0, 34.5, 75.3, 65.3, 124.7, 126.0, 126.3, 127.7, 128.2, 128.5, 128.7, 129.7, 129.9, 130.7, 131.6, 132.9, 133.1, 134.0, 166.8, 167.6. IR (neat): 2927, 2855, 1710, 1509, 1451, 1270, 1135, 781, 709  $\text{cm}^{-1}$ . HRMS ( $\text{M}+\text{H}$ )<sup>+</sup>: calcd. 489.3005, obsvd. 489.3022.

**Table 2, entry 14 (14-morpholino-14-oxotetradecan-6-yl 1-naphthoate) (2n).** The

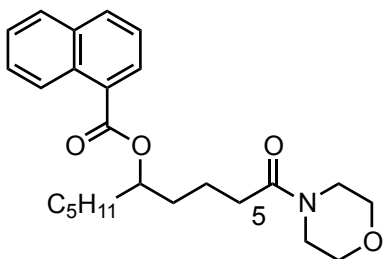

general procedure B was used. The product was purified by silica gel flash chromatography eluting with 10% methanol in dichloromethane to give the product as a colorless oil in 59% yield, >20:1 (linear:branched).  $R_f = 0.4$  (10% MeOH in DCM).  $^1\text{H}$  NMR (300 MHz,  $\text{CDCl}_3$ ):  $\delta$  0.88 (t,  $J = 7.1$  Hz, 3H), 1.21-1.48 (m, 14H), 1.55-1.80 (m, 6H), 2.27 (t,  $J = 7.7$  Hz, 2H), 3.42 (t,  $J = 4.8$  Hz, 2H), 3.56-3.67 (m, 6H), 5.20-5.29 (m, 1H), 7.46-7.43 (m, 3H), 7.88 (d,  $J = 8.0$  Hz, 1H), 8.01 (d,  $J = 8.0$  Hz, 1H), 8.14 (dd,  $J = 7.4, 1.3$  Hz, 1H), 8.89 (d,  $J = 8.7$  Hz, 1H).  $^{13}\text{C}$  NMR (100 MHz,  $\text{CDCl}_3$ ):  $\delta$  14.2, 22.8, 25.4(2), 25.6, 29.5, 29.7, 32.0, 33.3, 34.5, 42.1, 46.3, 66.9, 67.2, 75.3, 124.7, 126.0, 126.4, 127.8, 128.2, 128.7, 129.9, 131.6, 133.2, 134.1, 167.6, 172.0. IR (neat): 3853, 3743, 2928, 2855, 1707, 1652, 1456, 1275, 1242, 1136, 1116, 784, 668  $\text{cm}^{-1}$ . HRMS ( $\text{M}+\text{H}$ )<sup>+</sup>: calcd. 468.3114, obsvd. 468.3127.

**Table 2, entry 15 (6-(tert-butoxy)dodecane) (2o).** The general procedure A was used.

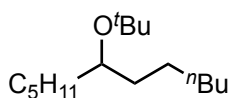

The product was purified by silica gel flash chromatography eluting with 5% ethyl acetate in hexanes to give the product as a colorless oil

in 35% yield, >20:1 (linear:branched).  $R_f = 0.6$  (5% EtOAc in hexanes).  $^1\text{H NMR}$  (500 MHz,  $\text{CDCl}_3$ ):  $\delta$  0.82-0.91 (m, 6H), 1.18 (s, 9H), 1.20-1.45 (m, 18H), 3.40 (quint,  $J = 5.7$  Hz, 1H).  $^{13}\text{C NMR}$  (125 MHz,  $\text{CDCl}_3$ ):  $\delta$  14.3(2), 22.9,(2), 25.5, 25.8, 29.1, 29.9, 32.1, 32.5, 36.6, 36.6, 71.5, 73.2. IR (neat): 2955, 2927, 2857, 1459, 1386, 1360, 1194, 1042, 1016, 723  $\text{cm}^{-1}$ . HRMS ( $\text{M}+\text{H}^+$ ): calcd. 243.2688, obsvd. 243.2693.

**Table 3, entry 1 (7-methyltridecan-6-yl benzoate) (6a).** The general procedure A was

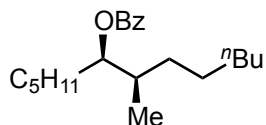

used. The product was purified by silica gel flash chromatography eluting with 5% ethyl acetate in hexanes to give the product as a colorless oil in 46% yield, >20:1 (linear:branched).  $R_f = 0.4$  (5% EtOAc in hexanes).  $^1\text{H NMR}$  (400 MHz,  $\text{CDCl}_3$ ):  $\delta$  0.83-0.92 (m,

6H), 0.99 (d,  $J = 6.8$ , 3H), 1.11-1.49 (m, 16H), 1.55-1.82 (m, 3H), 5.11 (dt,  $J = 8.4$ , 4.3 Hz, 1H), 7.41-7.47 (m, 2H), 7.52-7.57 (m, 1H), 8.04-8.08 (m, 2H).  $^{13}\text{C NMR}$  (125 MHz,  $\text{CDCl}_3$ ):  $\delta$  14.2, 14.3, 14.7, 22.7, 22.8, 25.7, 27.4, 29.7, 31.6, 32.0(2), 33.3, 36.6, 78.2, 128.5, 129.8, 131.2, 132.9, 166.6. IR (neat): 2955, 2925, 2856, 1715, 1450, 1269, 1108, 708  $\text{cm}^{-1}$ . HRMS ( $\text{M}+\text{Na}^+$ ): calcd. 341.2457, obsvd. 341.2466.

**Table 3, entry 2 (tert-butyl((2,2-dimethyloctyl)oxy)diphenylsilane) (6b).** The general

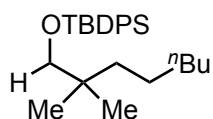

procedure A was used. The product was purified by silica gel flash chromatography eluting with 2% ethyl acetate in hexanes to give the product as a colorless oil in 84% yield, >20:1 (linear:branched).  $R_f = 0.8$  (5% EtOAc in hexanes).  $^1\text{H NMR}$  (300 MHz,  $\text{CDCl}_3$ ):  $\delta$  0.87-0.94

(m, 9H), 1.09 (s, 9H), 1.16-1.38 (m, 10H), 3.33 (s, 2H), 7.36-7.48 (m, 6H), 7.66-7.72 (m, 4H).  $^{13}\text{C NMR}$  (75 MHz,  $\text{CDCl}_3$ ):  $\delta$  14.4, 19.7, 22.9, 24.1, 24.5, 27.1, 30.6, 32.2, 35.8, 39.1, 72.4, 127.7, 129.7, 134.3, 135.9. IR (neat): 2955, 2928, 2856, 1471, 1427, 1105, 818, 698, 613  $\text{cm}^{-1}$ . HRMS ( $\text{M}+\text{Na}^+$ ): calcd. 419.2746, obsvd. 419.2758.

**Table 3, entry 3 (2,2-dimethyloctyl benzoate) (6c).** The general procedure A was used.

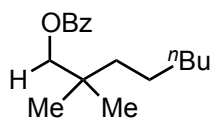

The product was purified by silica gel flash chromatography eluting with 5% diethyl ether in hexanes to give the product as a colorless oil in 81% yield, >20:1 (linear:branched).  $R_f = 0.6$  (10% Et<sub>2</sub>O in

hexanes).  $^1\text{H NMR}$  (300 MHz,  $\text{CDCl}_3$ ):  $\delta$  0.88 (t,  $J = 6.3$  Hz, 3H), 1.00 (s, 6H), 1.25-1.40 (m, 10H), 4.04 (s, 2H), 7.41-7.49 (m, 2H), 7.53-7.59 (m, 1H), 8.03-8.09 (m, 2H).  $^{13}\text{C NMR}$  (75 MHz,  $\text{CDCl}_3$ ):  $\delta$  14.3, 22.8, 23.9, 24.7, 30.4, 32.0, 34.2, 39.6, 73.1, 128.5, 129.7, 130.7, 133.0, 166.8. IR (neat): 2956, 2928, 2857, 1719, 1602, 1601, 1470, 1393, 1266, 1175, 1111, 1069, 1026, 970, 707, 686, 673  $\text{cm}^{-1}$ . HRMS ( $\text{M}+\text{Na}^+$ ): calcd. 285.1831, obsvd. 285.1827.

**Table 3, entry 4 (3,3-dimethylpent-4-en-1-yl benzoate) (6d).** The general procedure A was used. The product was purified by silica gel flash chromatography eluting with 5% ethyl acetate in hexanes to give the product as a colorless oil in 75% yield, >20:1 (linear:branched).  $R_f = 0.4$  (5% EtOAc in hexanes).  $^1\text{H NMR}$  (500 MHz,  $\text{CDCl}_3$ ):  $\delta$  0.88 (t,  $J = 6.8$  Hz, 3H), 0.95 (s, 6H), 1.24-1.32 (m, 10H), 1.70 (t,  $J = 7.4$  Hz, 2H), 4.36 (t,  $J = 7.3$  Hz, 2H), 7.43 (t,  $J = 7.7$  Hz, 2H), 7.55 (t,  $J = 7.5$  Hz, 1H), 8.04 (d,  $J = 8.0$  Hz, 2H).  $^{13}\text{C NMR}$  (125 MHz,  $\text{CDCl}_3$ ):  $\delta$  14.3, 22.9, 24.2, 27.7, 30.4, 32.1, 32.5, 40.0, 42.6, 62.7, 128.5, 130.8, 133.0, 166.9. IR (neat): 2955, 2927, 2857, 1718, 1451, 1269, 1110, 707  $\text{cm}^{-1}$ . HRMS ( $\text{M}+\text{Na}$ ) $^+$ : calcd. 299.1987, obsvd. 299.1988.

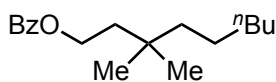



Separation of enantiomers by SFC. ChiraCel AY-H column, isochratic 2 mL/min, 1% IPA, 160 bar, 28 °C, 7.9 min (minor), 9.3 min (major).

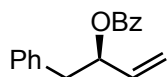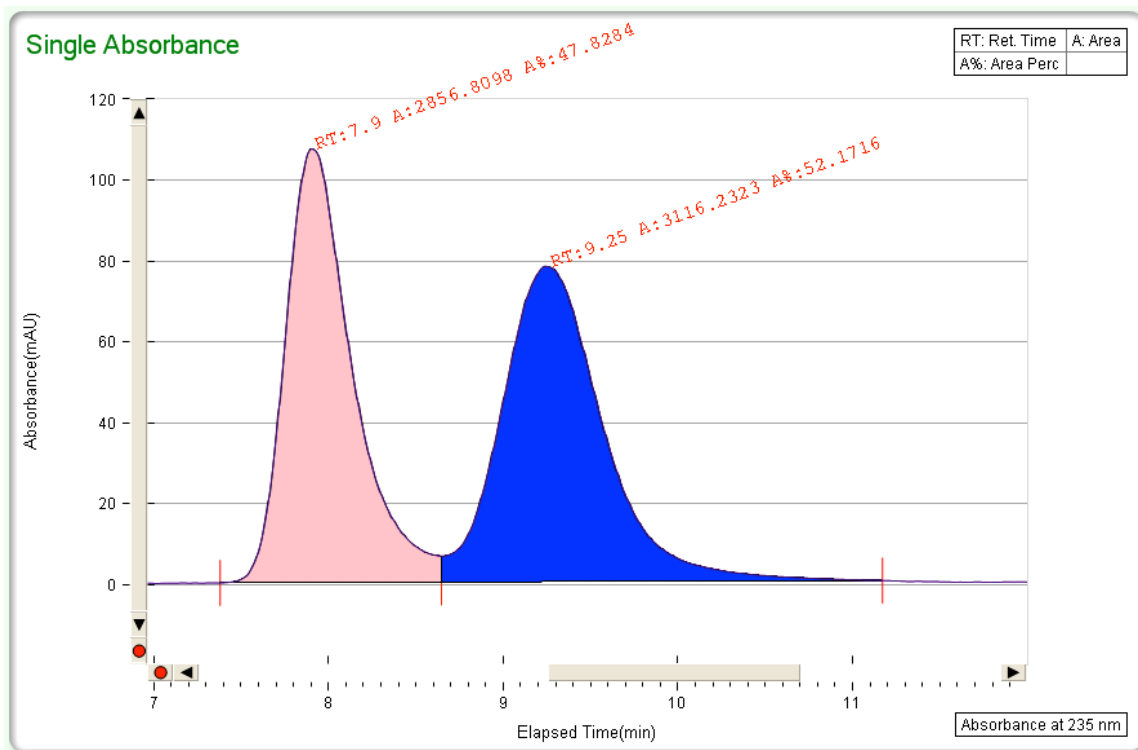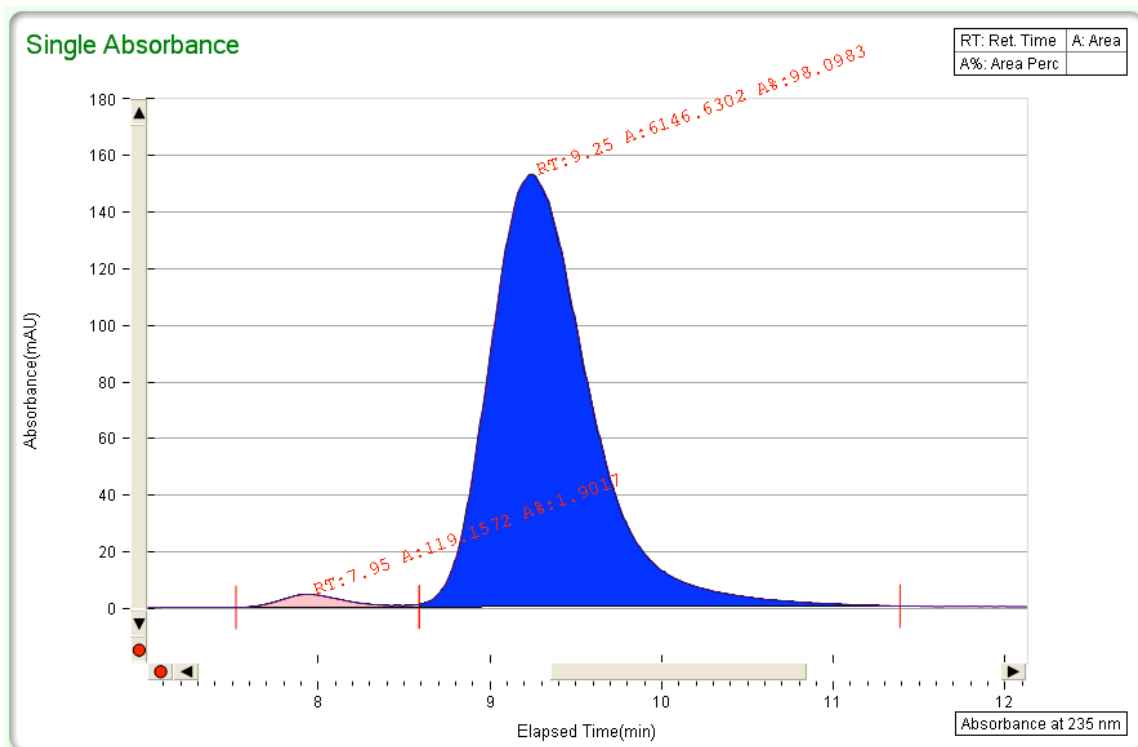

Separation of enantiomers by SFC. ChiraCel OD column, isochratic 3 mL/min, 1% IPA, 160 bar, 28 °C, 6.4 min (major), 7.6 min (minor).

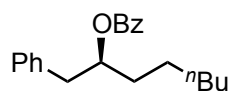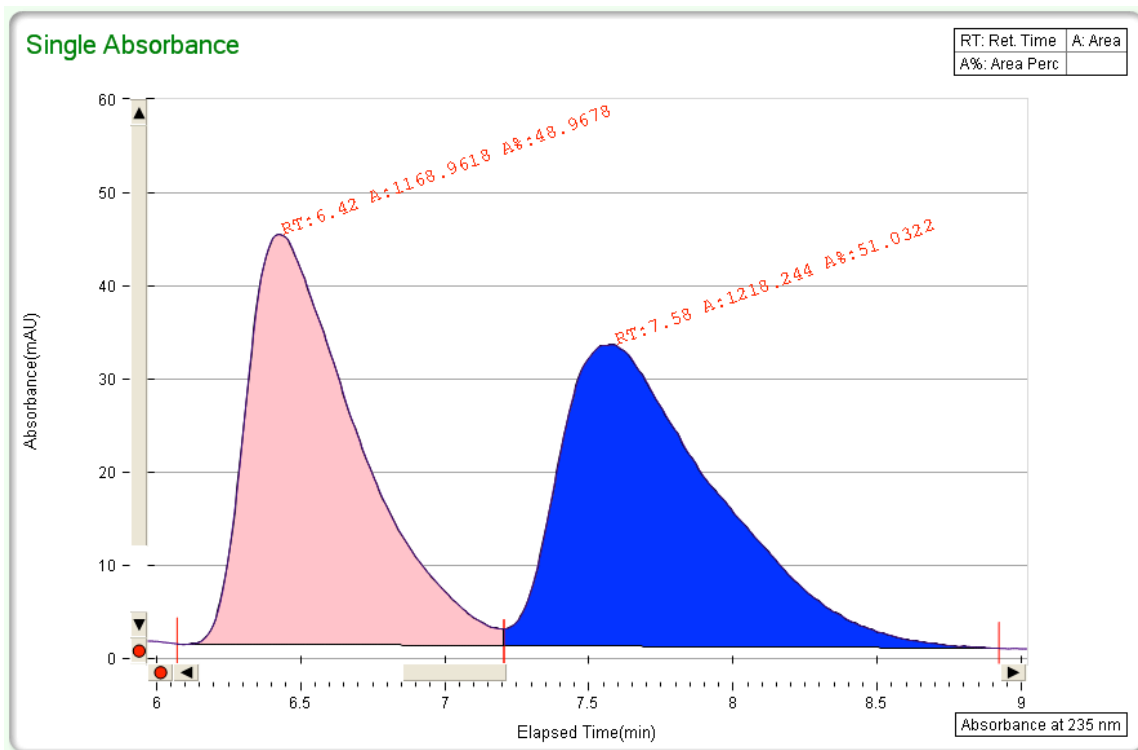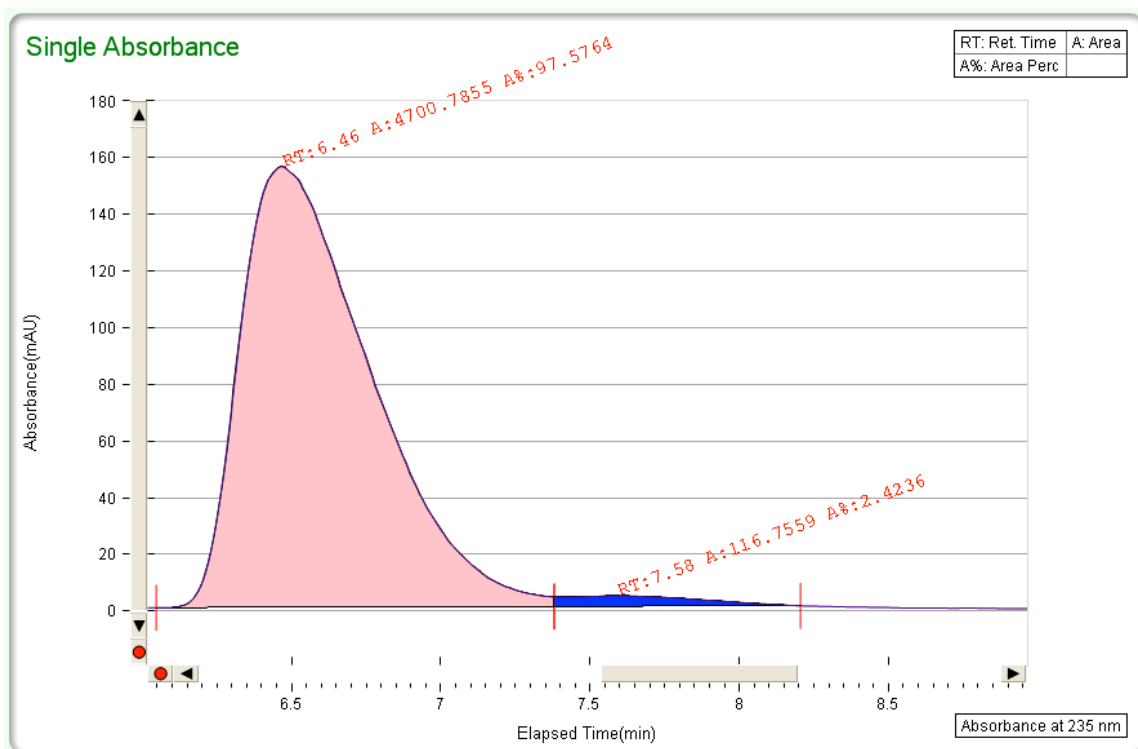

## References:

- (1) Chojnacka, A.; Obara, R.; Wawrzeńczyk, C. *Tetrahedron: Asymmetry* **2007**, *18*, 101-107.
- (2) McCombs, J. R.; Michel, B. W.; Sigman, M. S. *J. Org. Chem.* **2011**, *76*, 3609-3613.
- (3) Still, W. C. *J. Am. Chem. Soc.* **1978**, *100*, 1481-1487.
- (4) Semmelhack, M. F.; Shanmugam, P. *Tetrahedron Lett.* **2000**, *41*, 3567-3571.
- (5) Srikrishna, A.; Dethe, D. H.; Ravi Kumar, P. *Tetrahedron Lett.* **2004**, *45*, 2939-2942.
- (6) Kleschick, W. A. *J. Org. Chem.* **1986**, *51*, 5429-5433.
- (7) Allevi, P.; Cajone, F.; Ciuffreda, P.; Anastasia, M. *Tetrahedron Lett.*, **1995**, *36*, 1347-1350.
- (8) Lumbroso, A.; Koschker, P.; Vautravers, N. R.; Breit, B. *J. Am. Chem. Soc.* **2011**, *133*, 2386–2389
- (9) Koschker, P.; Lumbroso, A.; Breit, B. *J. Am. Chem. Soc.* **2011**, *133*, 20746-20749.
- (10) Felluga, F.; Forzato, C.; Ghelfi, F.; Nitti, P.; Pitacco, G.; Pagnoni, U. M.; Roncaglia, F. *Tetrahedron: Asymmetry* **2007**, *18*, 527-536.
- (11) de Greef, M.; Zard, S. Z. *Org. Lett.* **2007**, *9*, 1773-1776
- (12) Koschker, P.; Lumbroso, A.; Breit, B. *J. Am. Chem. Soc.* **2011**, *133*, 20746-20749.
- (13) Bartoli, G.; Bosco, M.; Locatelli, M.; Marcantoni, E.; Melchiorre, P.; Sambri, L. *Org. Lett.* **2005**, *7*, 427-430.
- (14) Fuwa, H.; Yamaguchi, H.; Sasaki, M. *Org. Lett.* **2010**, *12*, 1848-1851.
- (15) Borg, T.; Tuzina, P.; Somfai, P. *J. Org. Chem.* **2011**, *76*, 8070-8075.
- (16) Wakita, N.; Hara, S. *Tetrahedron* **2010**, *66*, 7939-7945.
- (17) F. O. Arp, G. C. Fu, *J. Am. Chem. Soc.* 2005, *127*, 10482-10483.
- (18) Huo, S. *Org. Lett.* **2003**, *5*, 423-425.

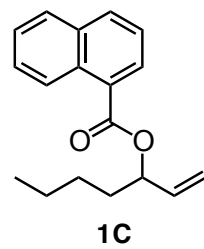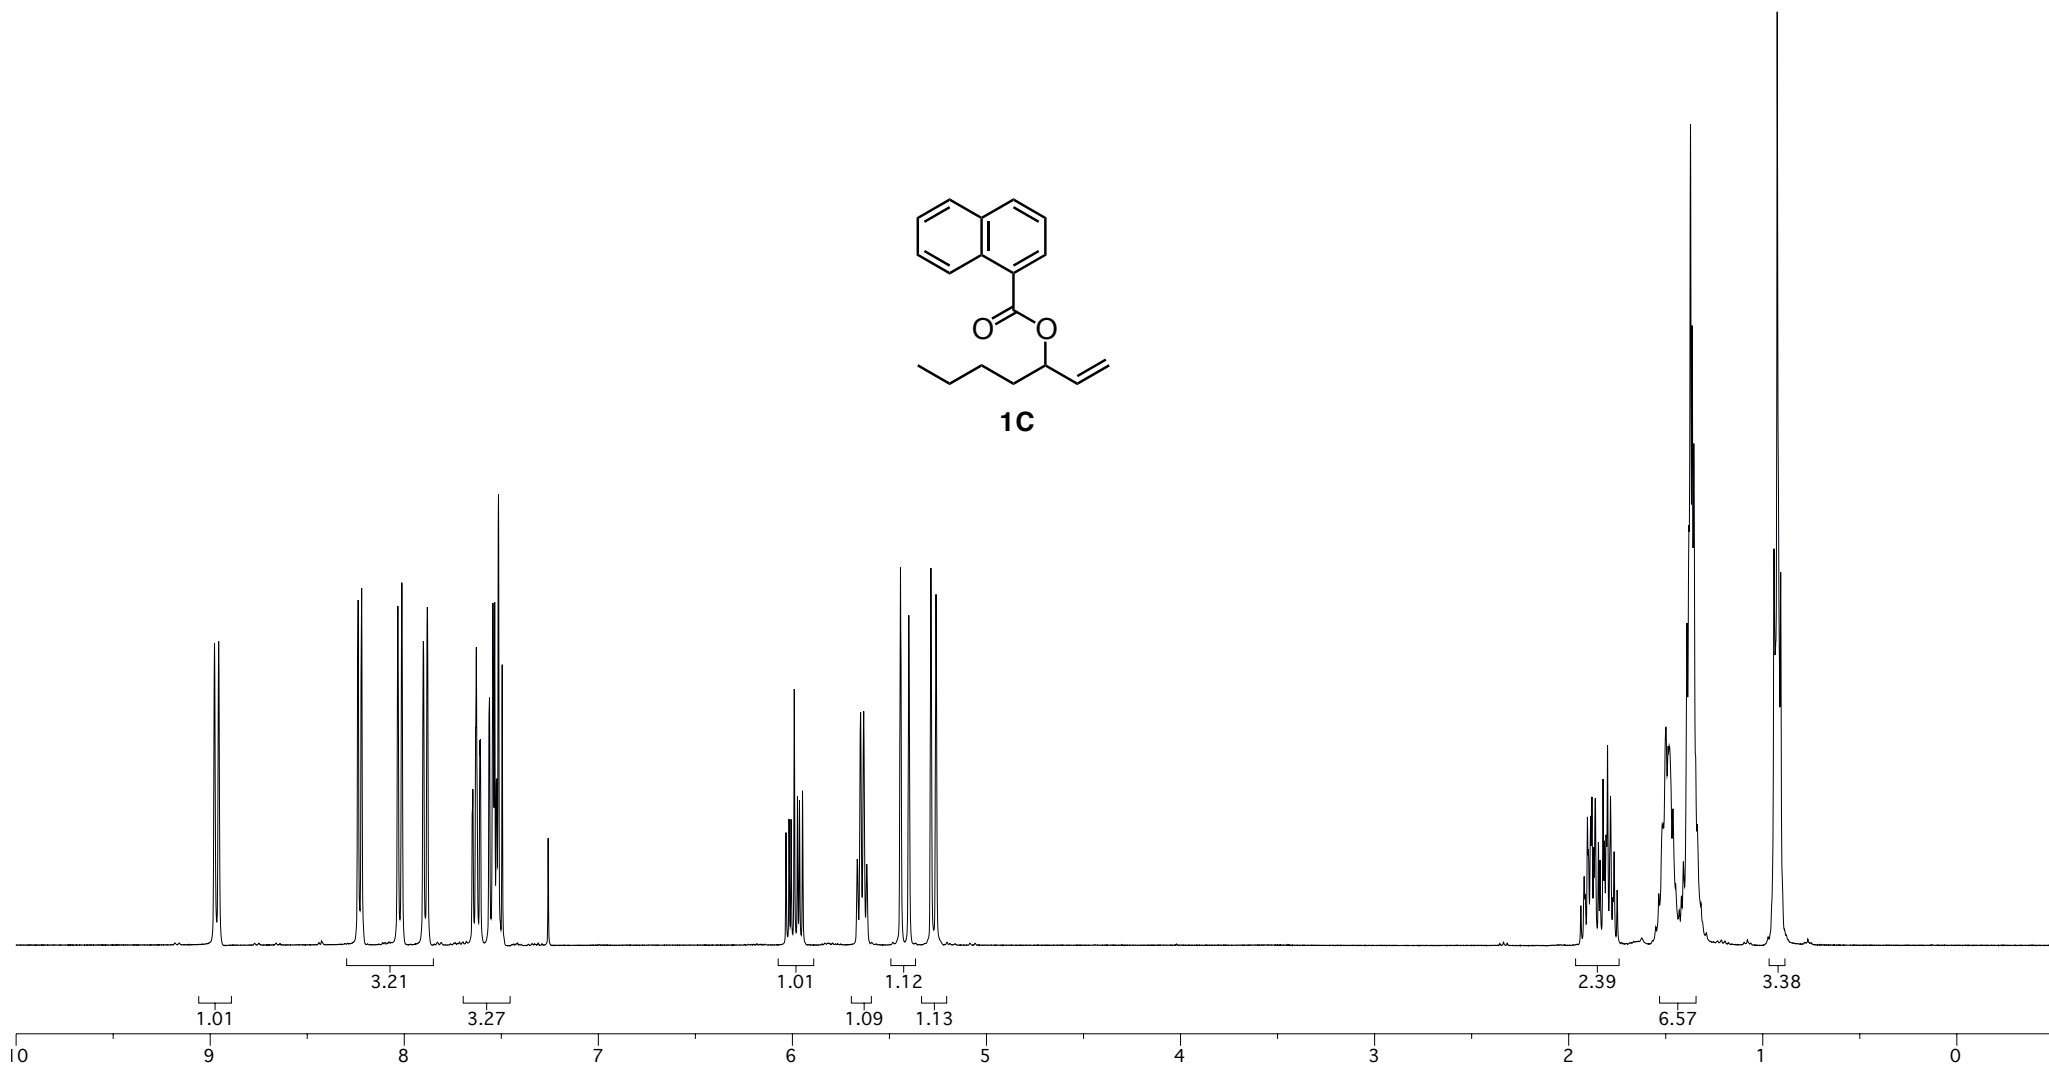

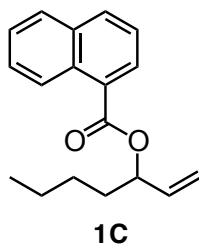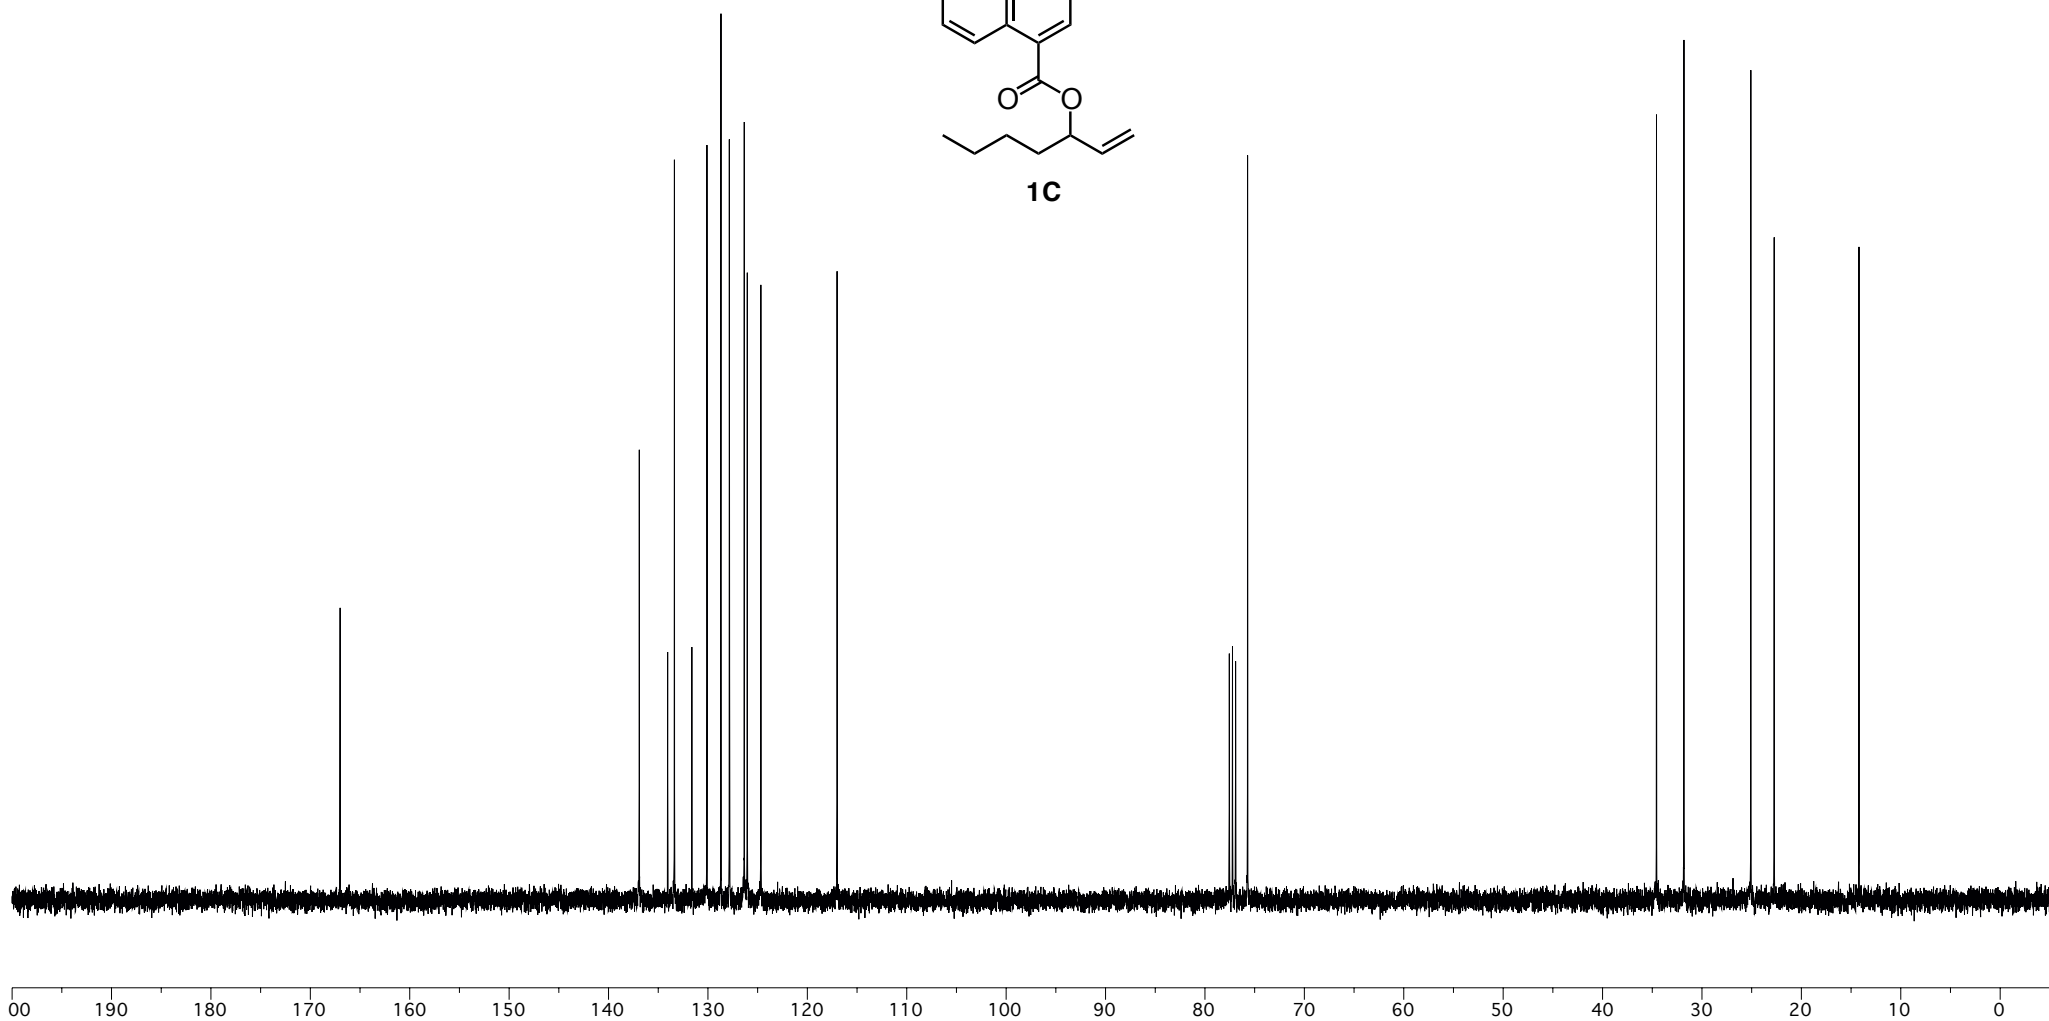

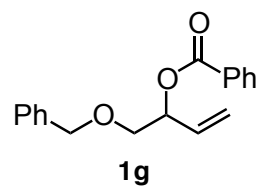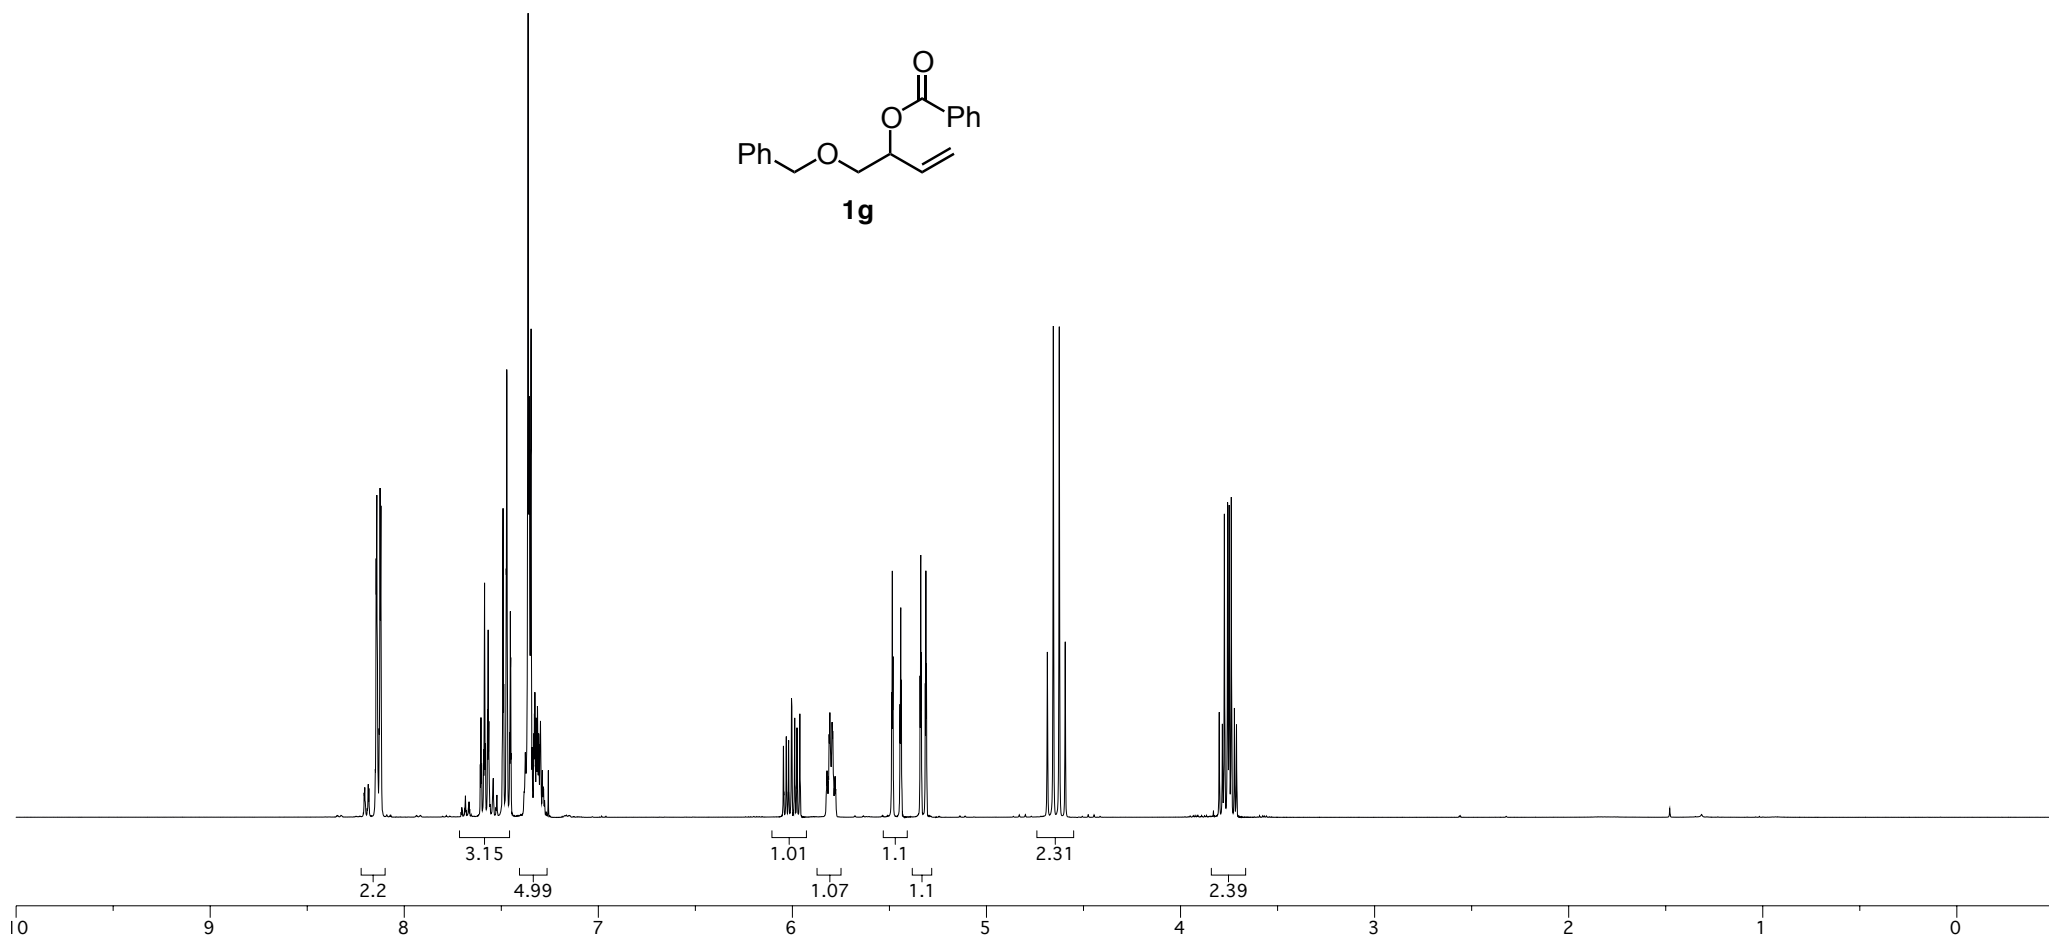

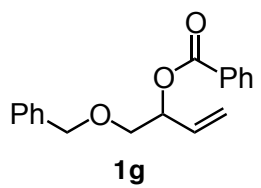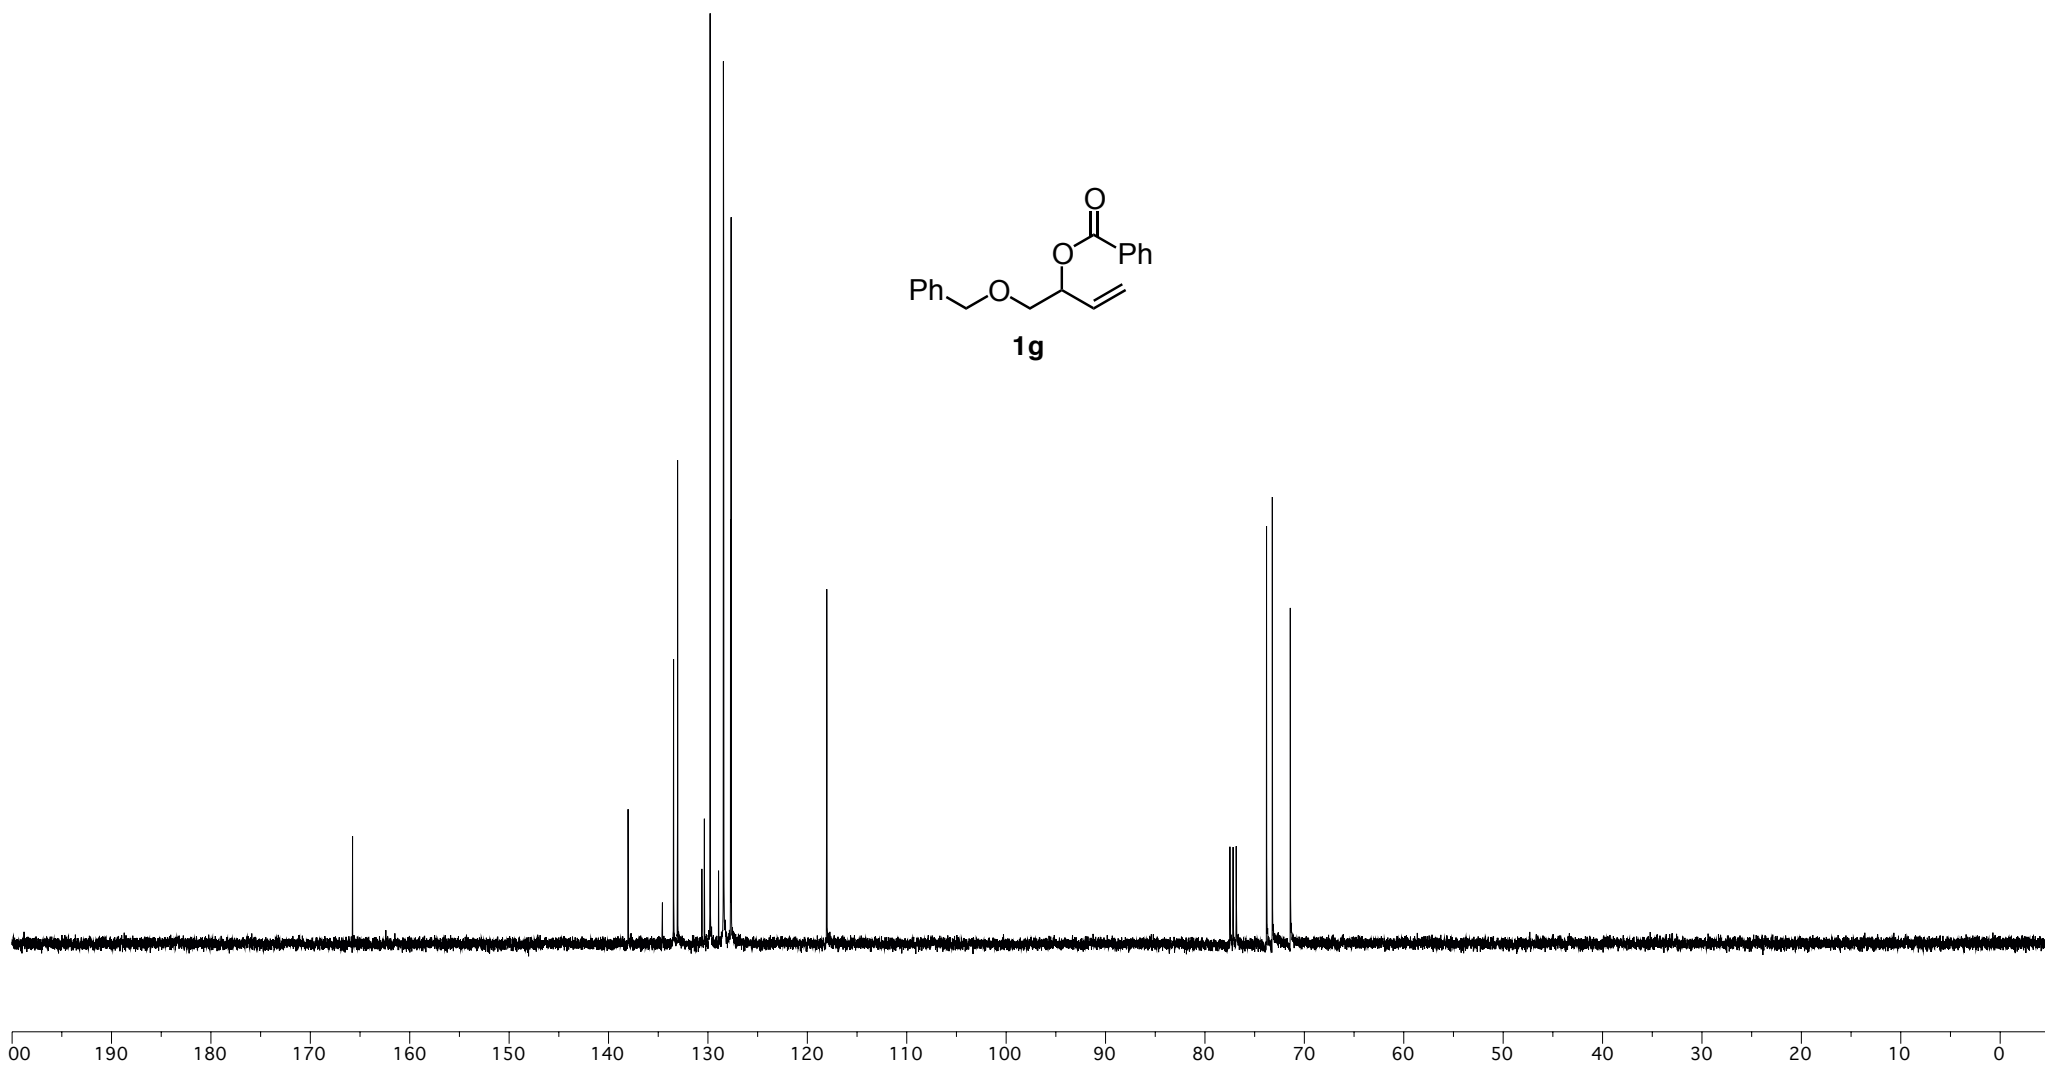

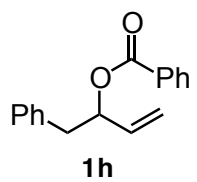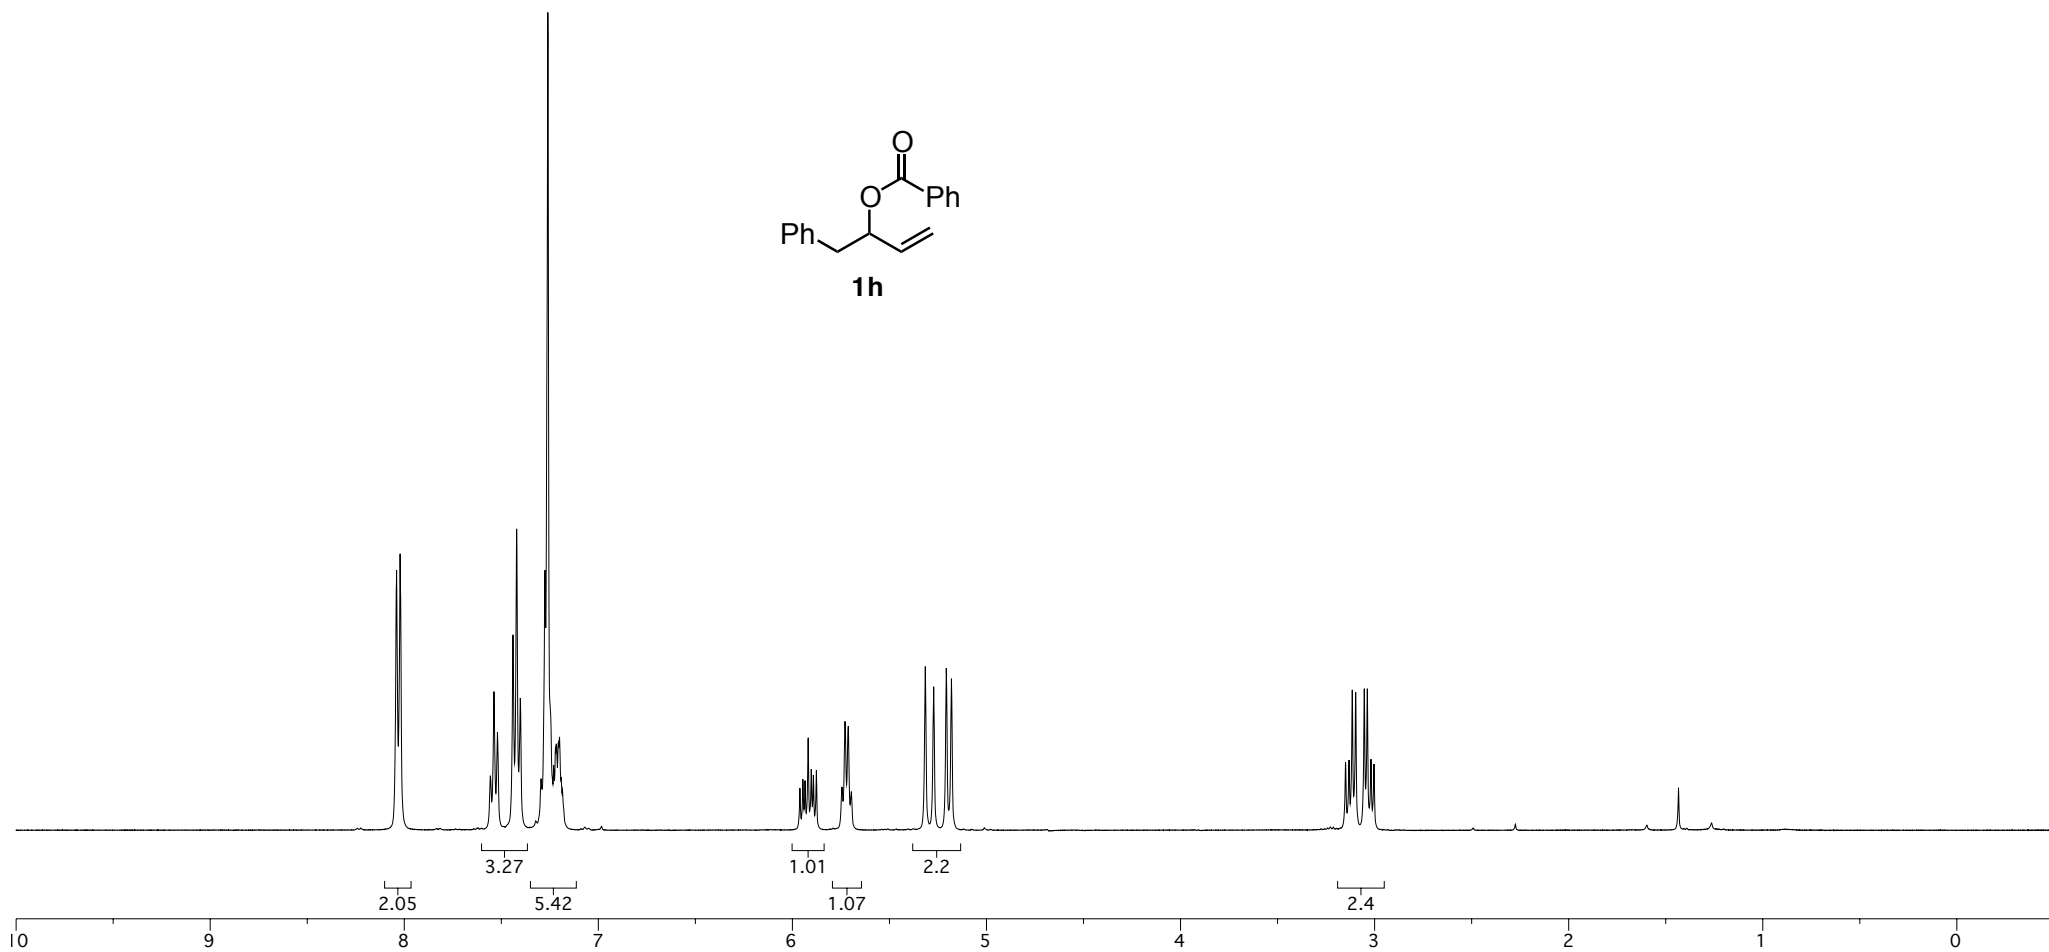



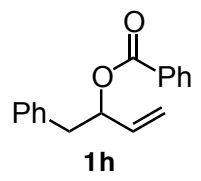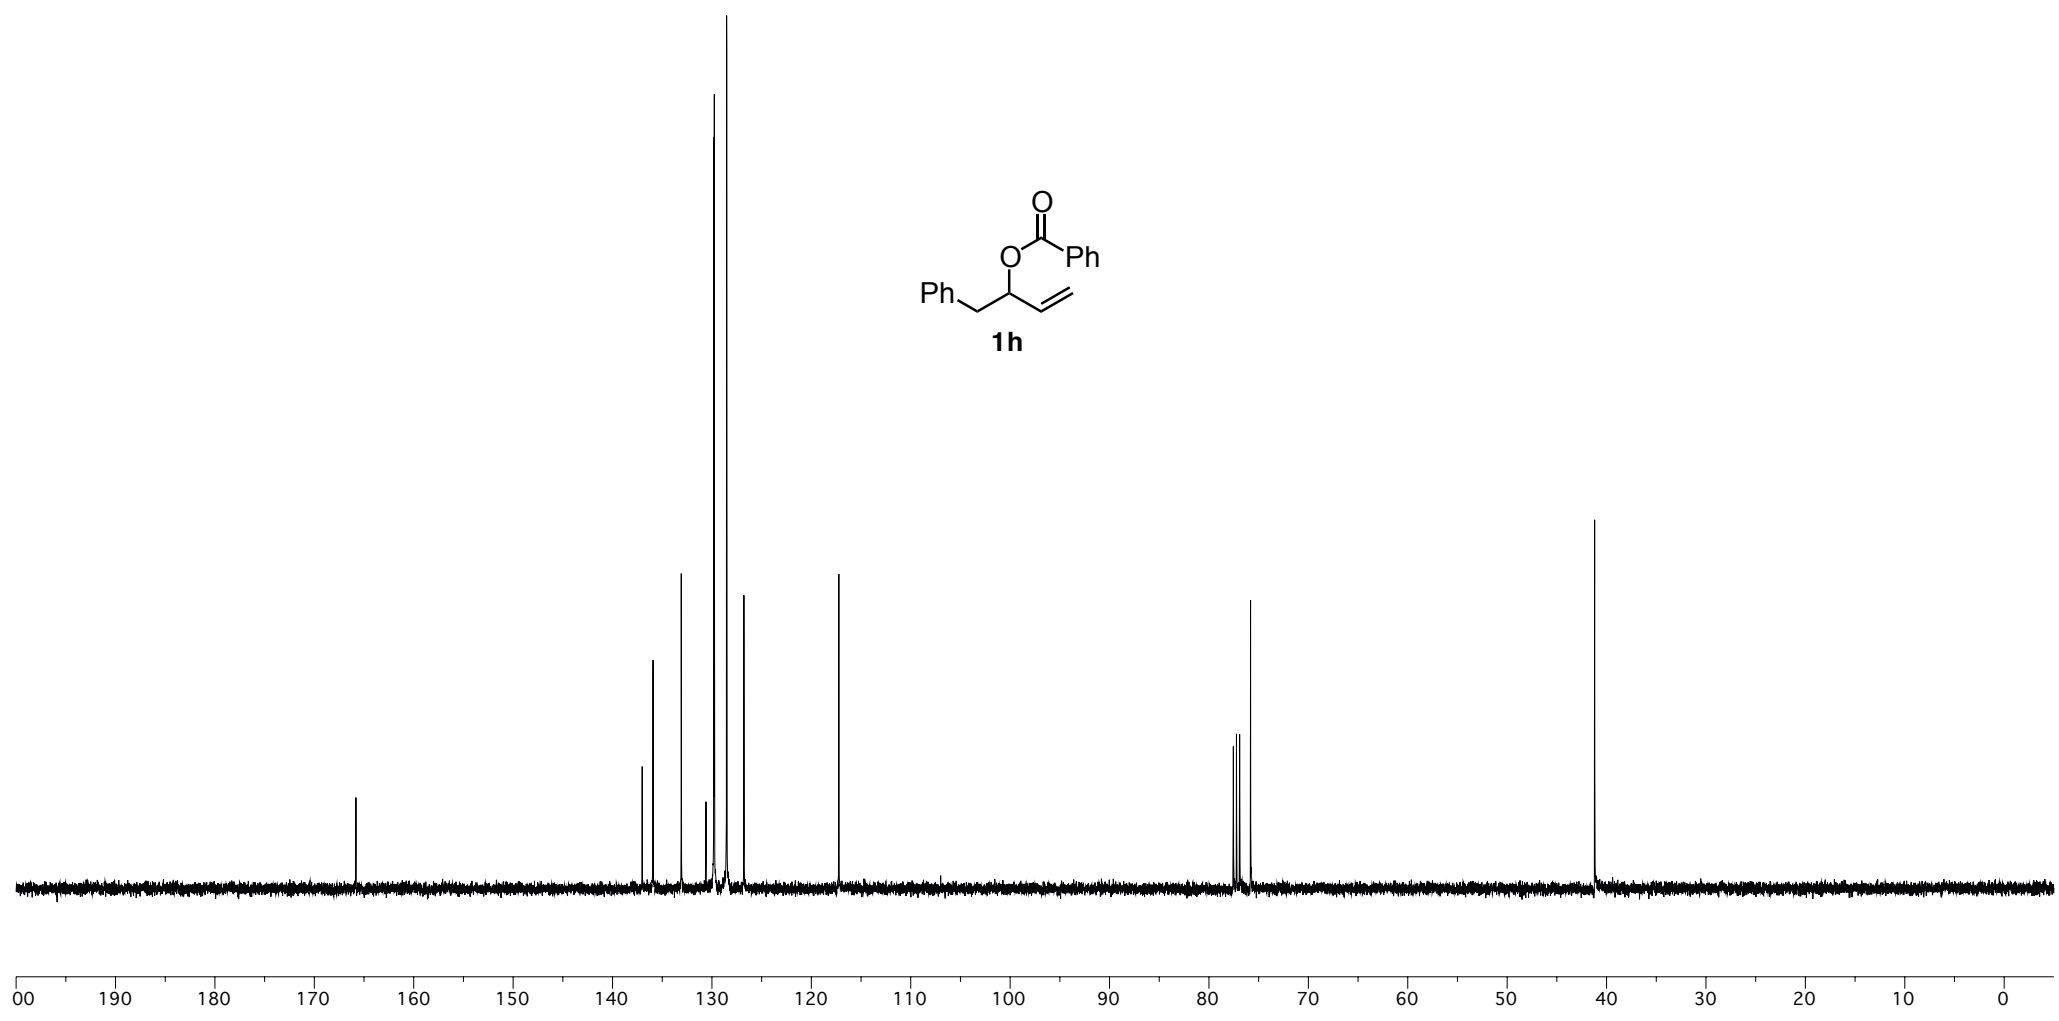

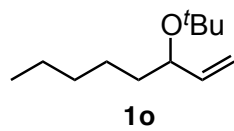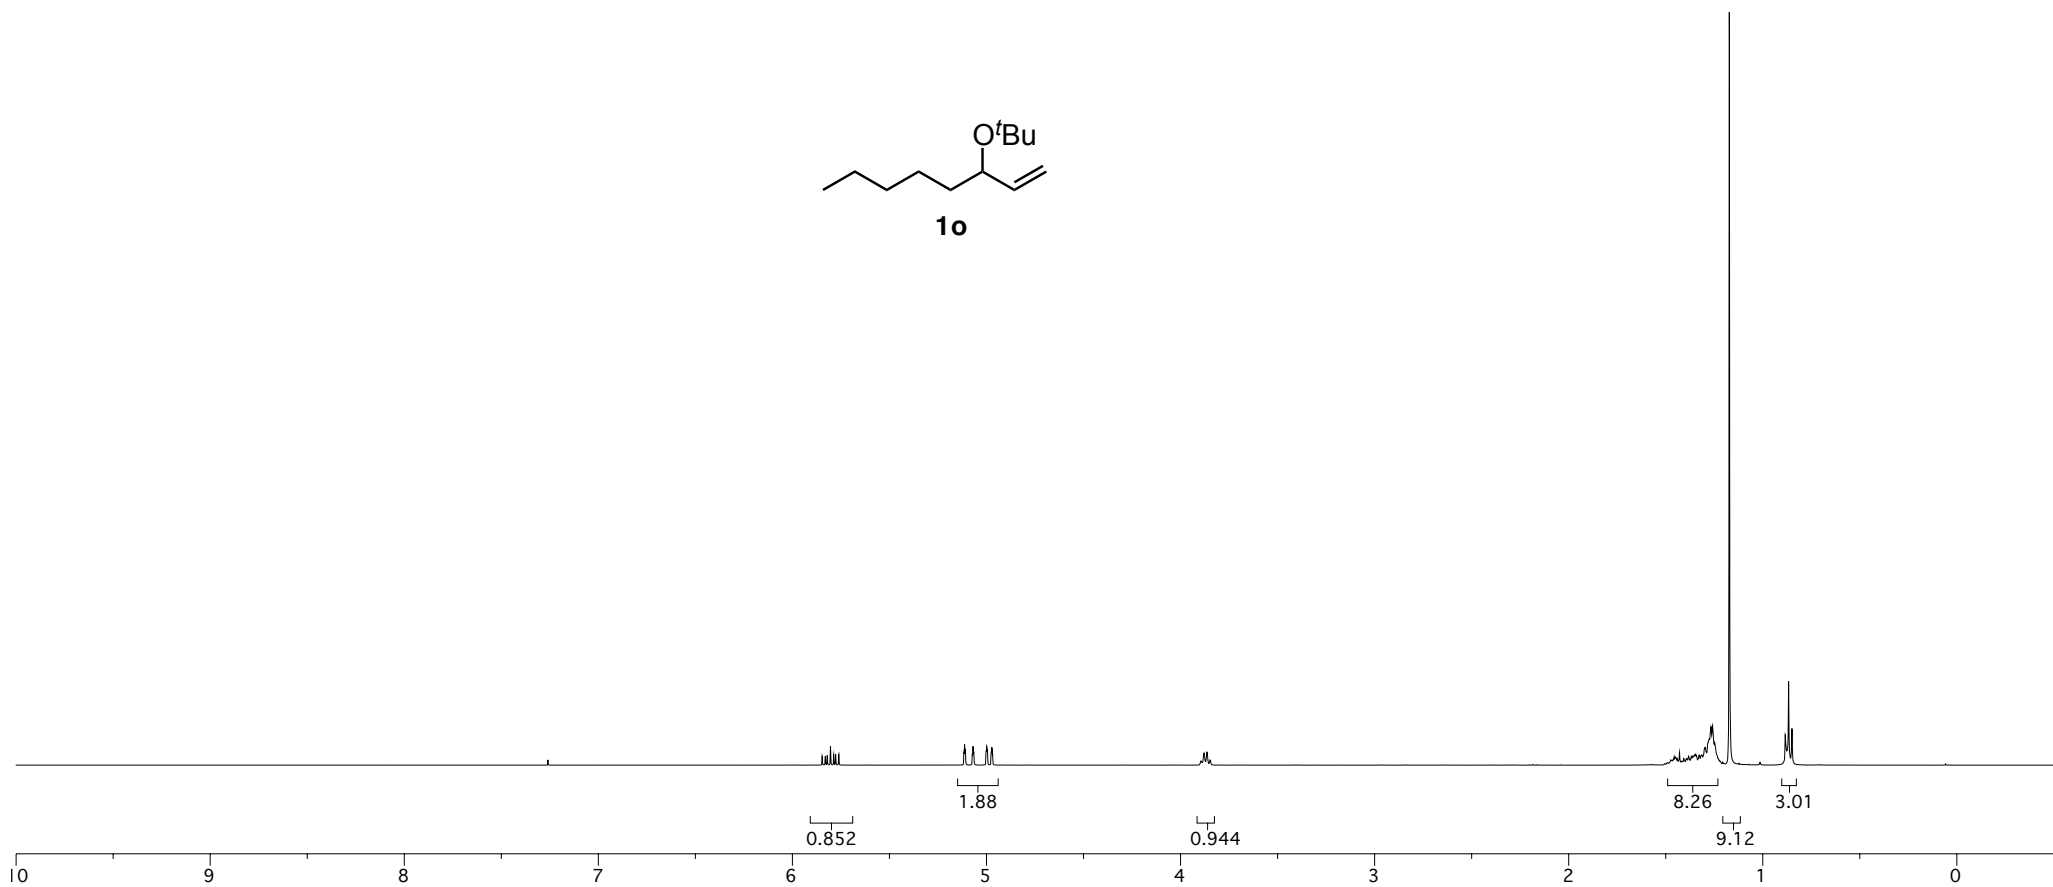

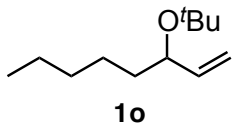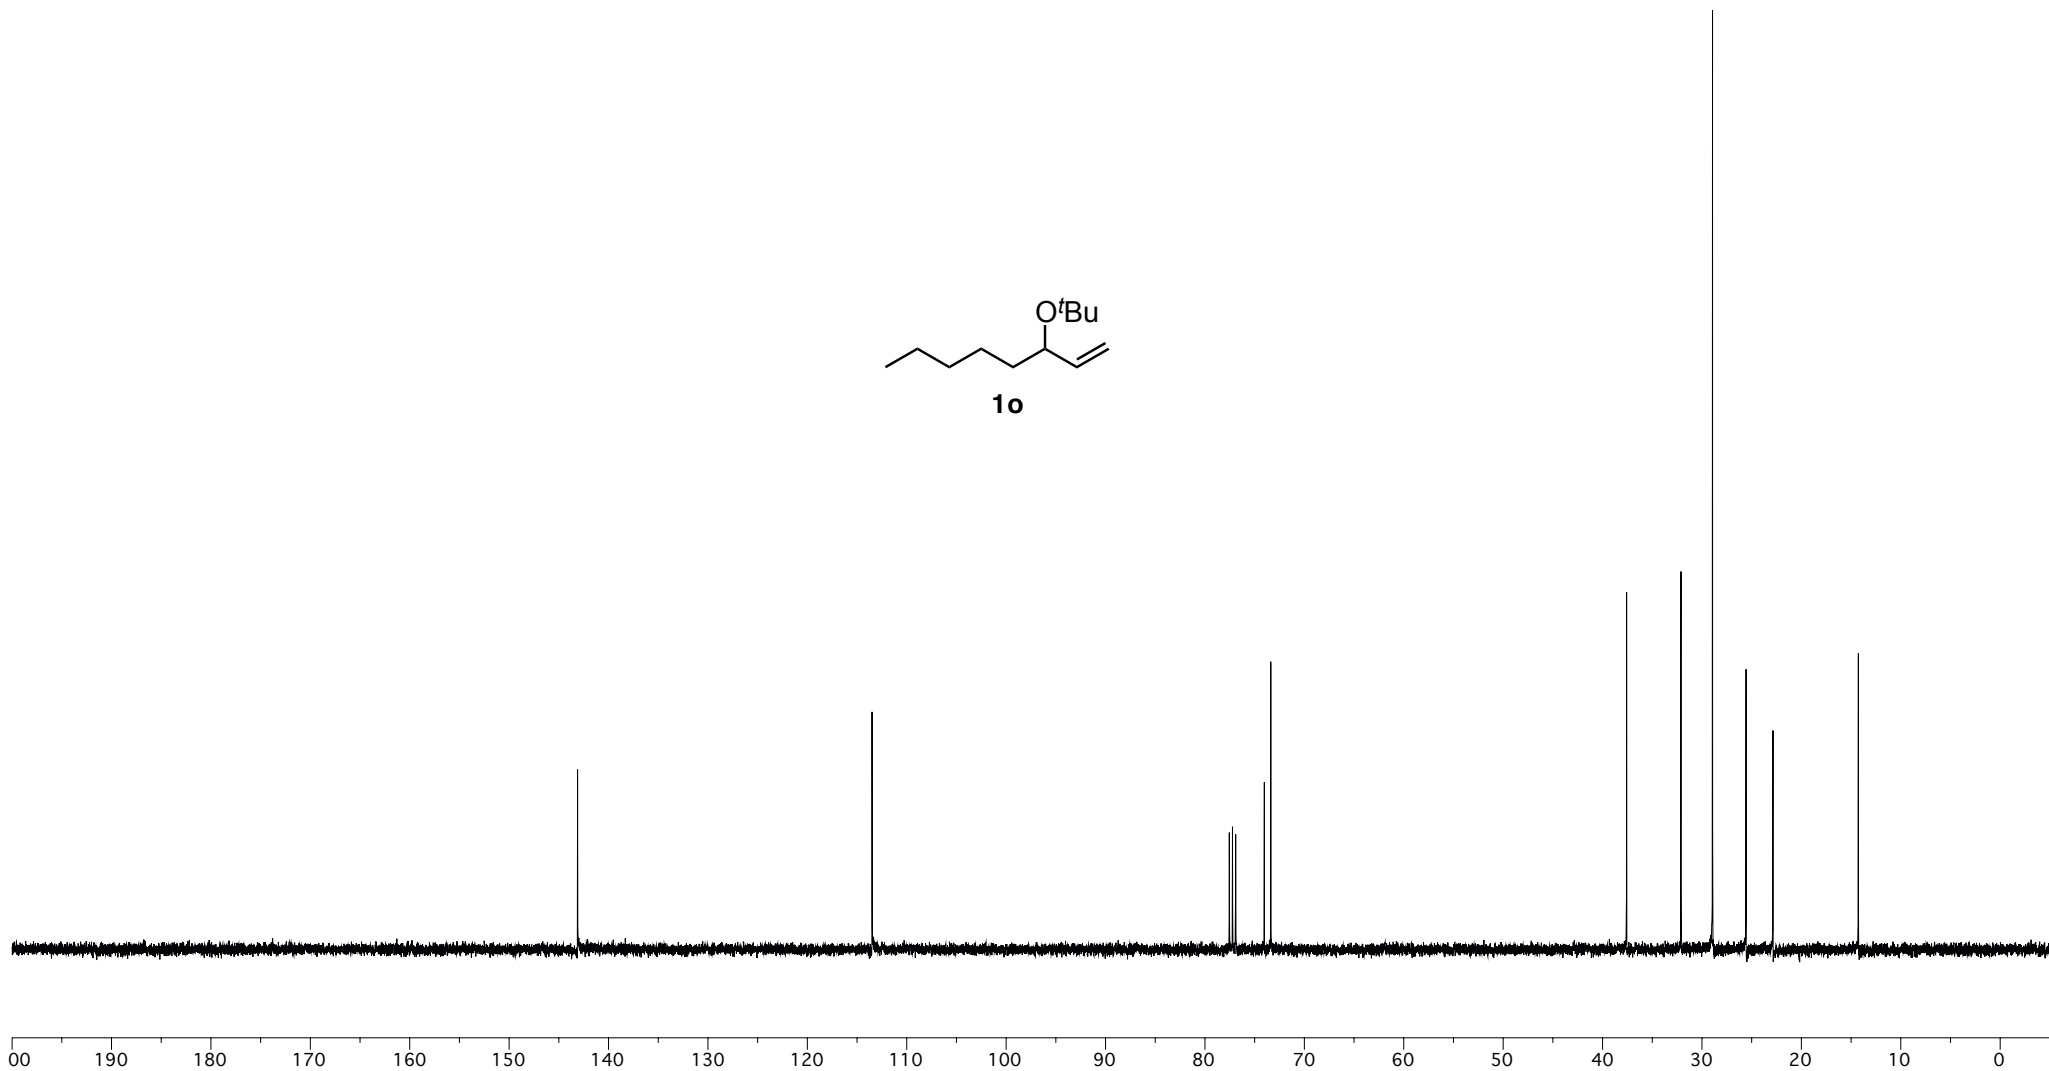

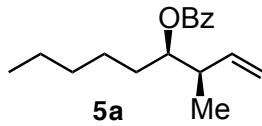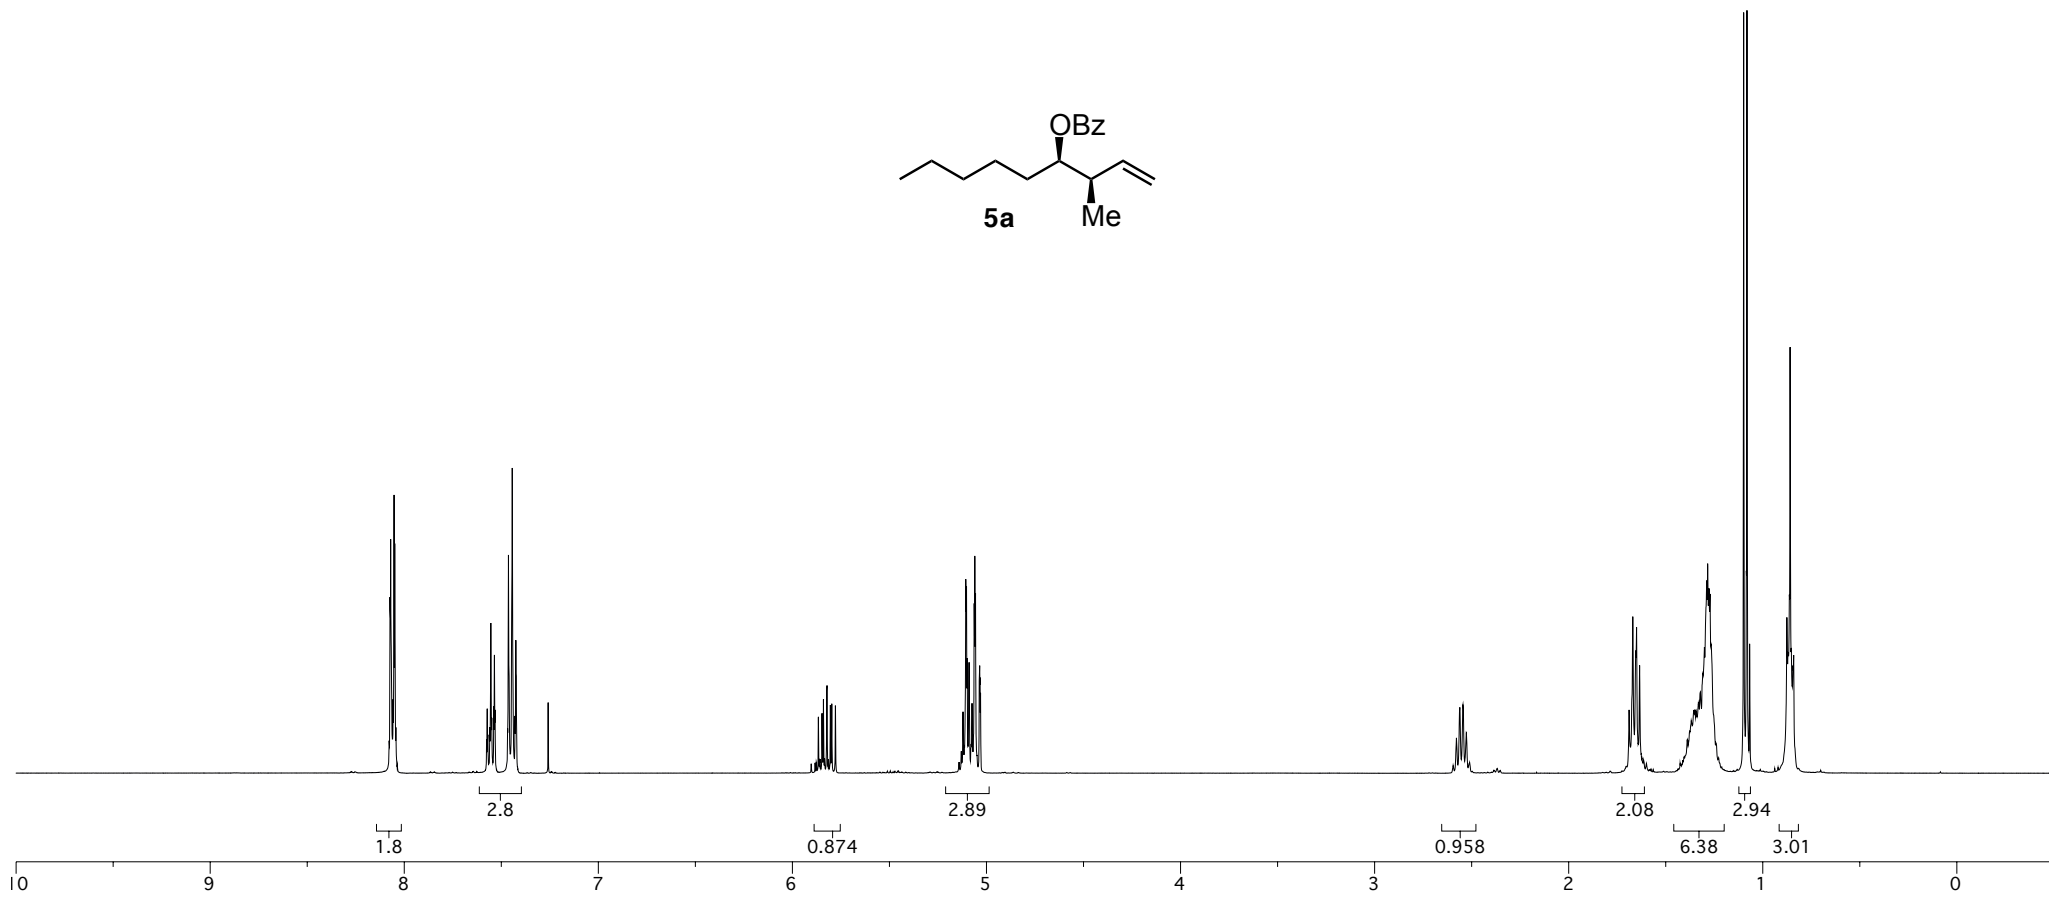

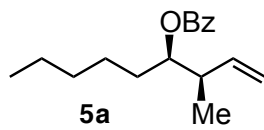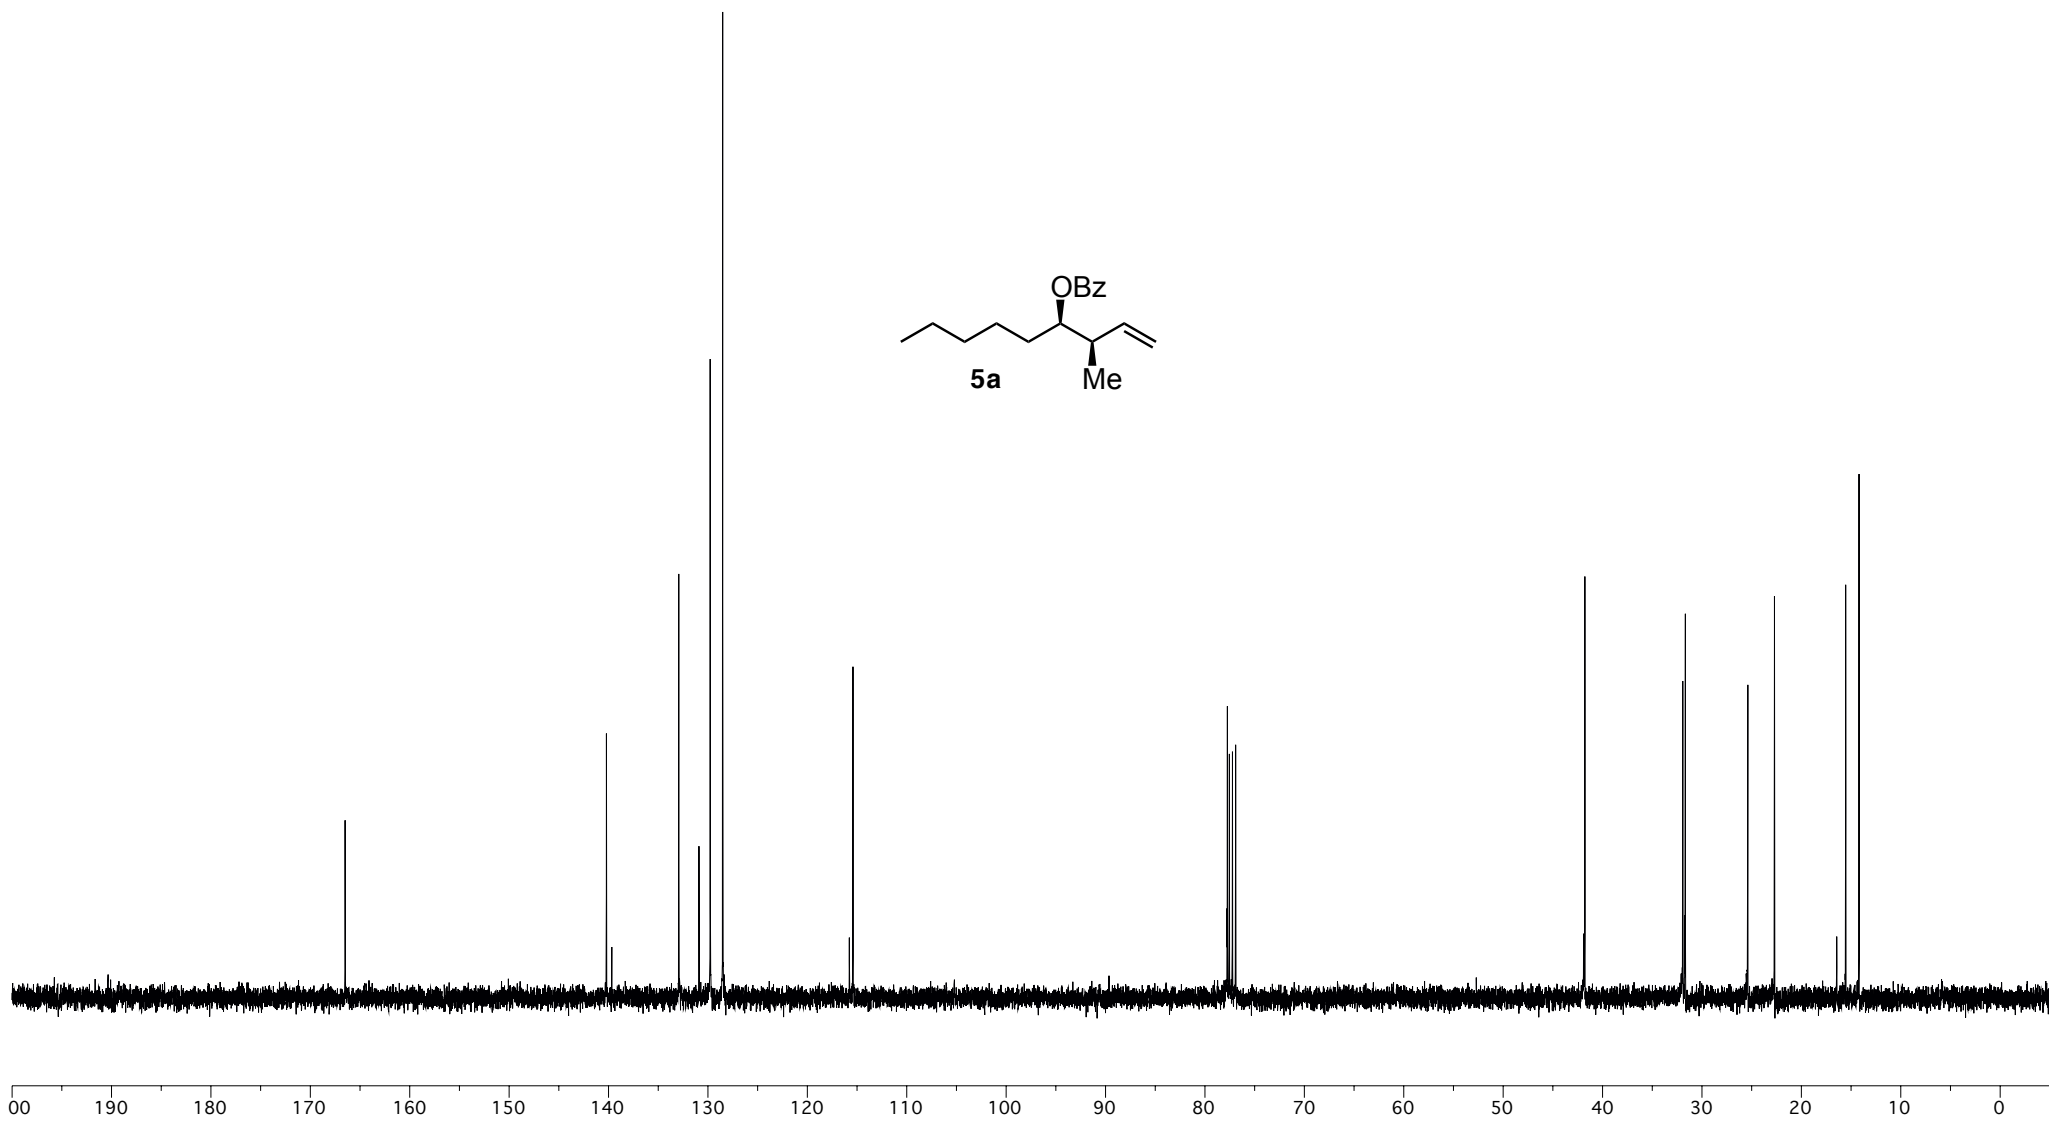

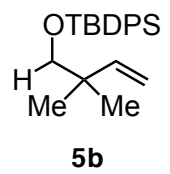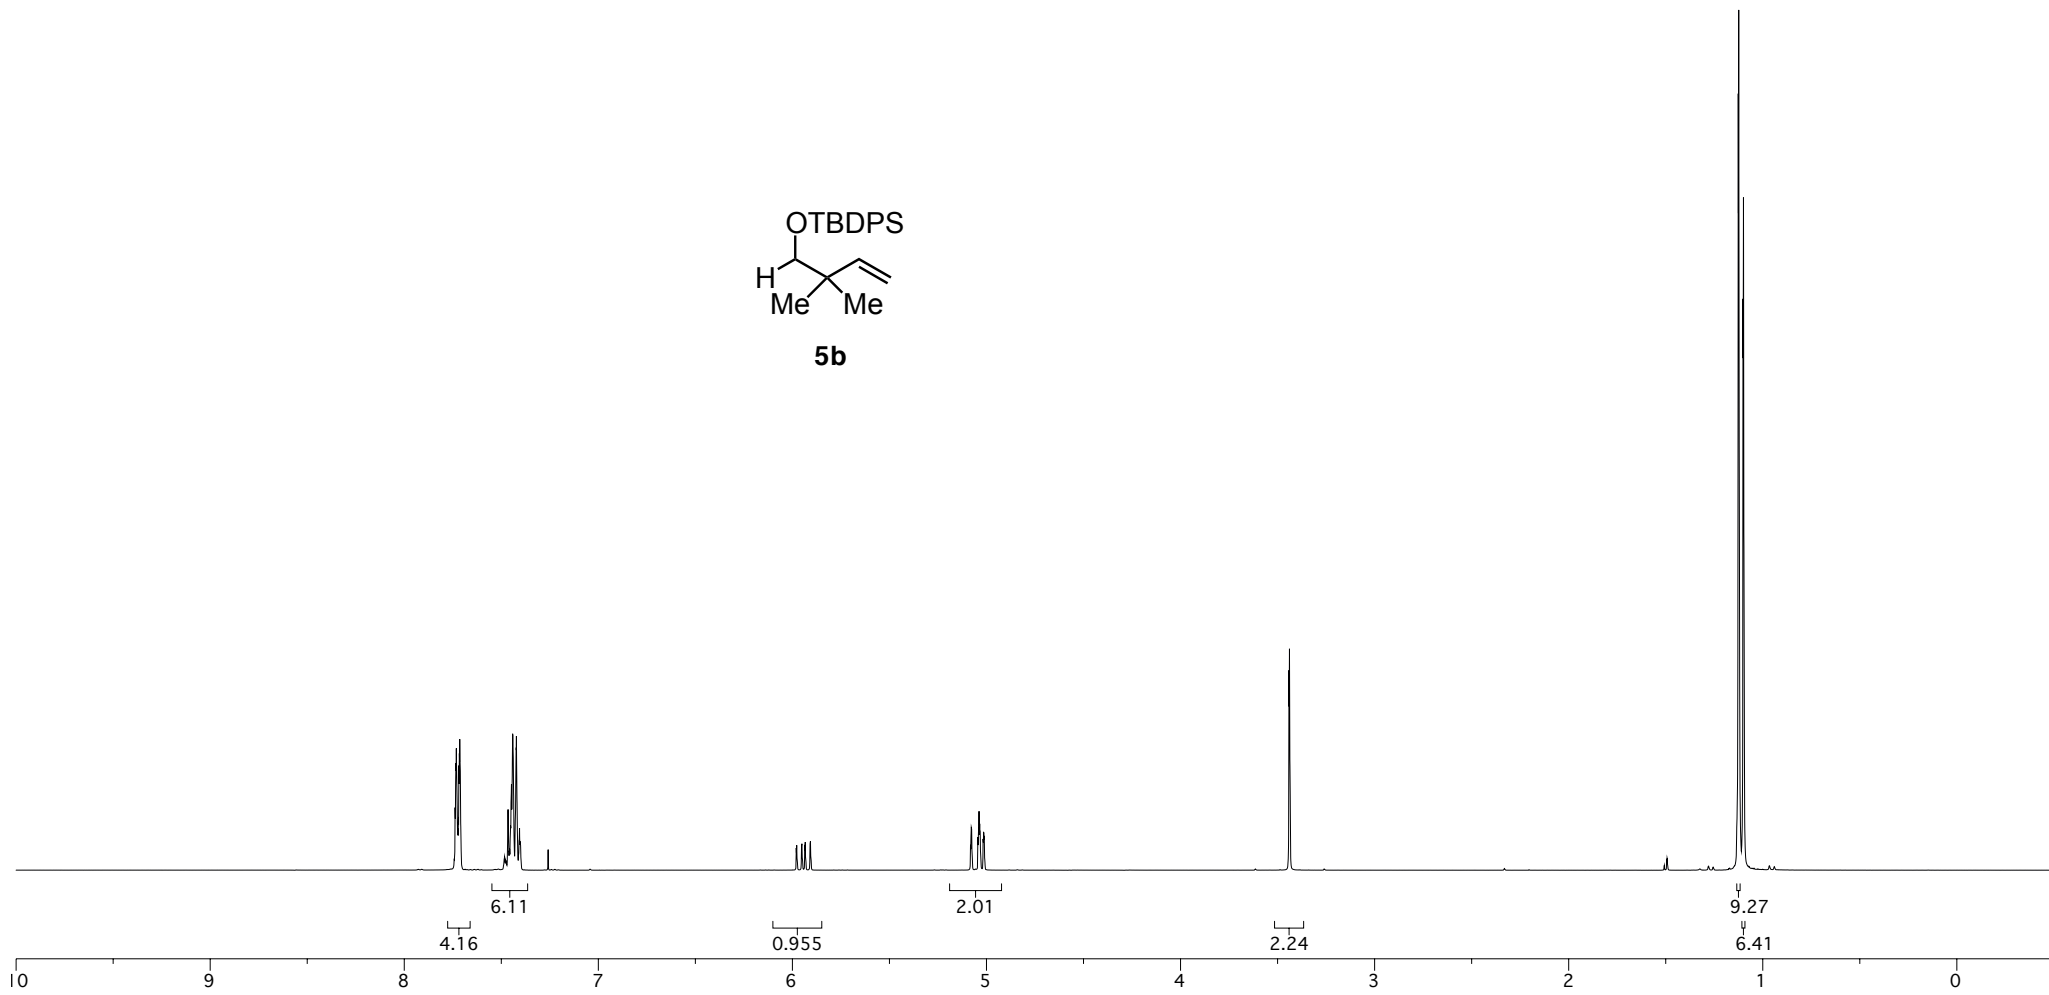

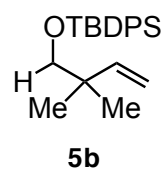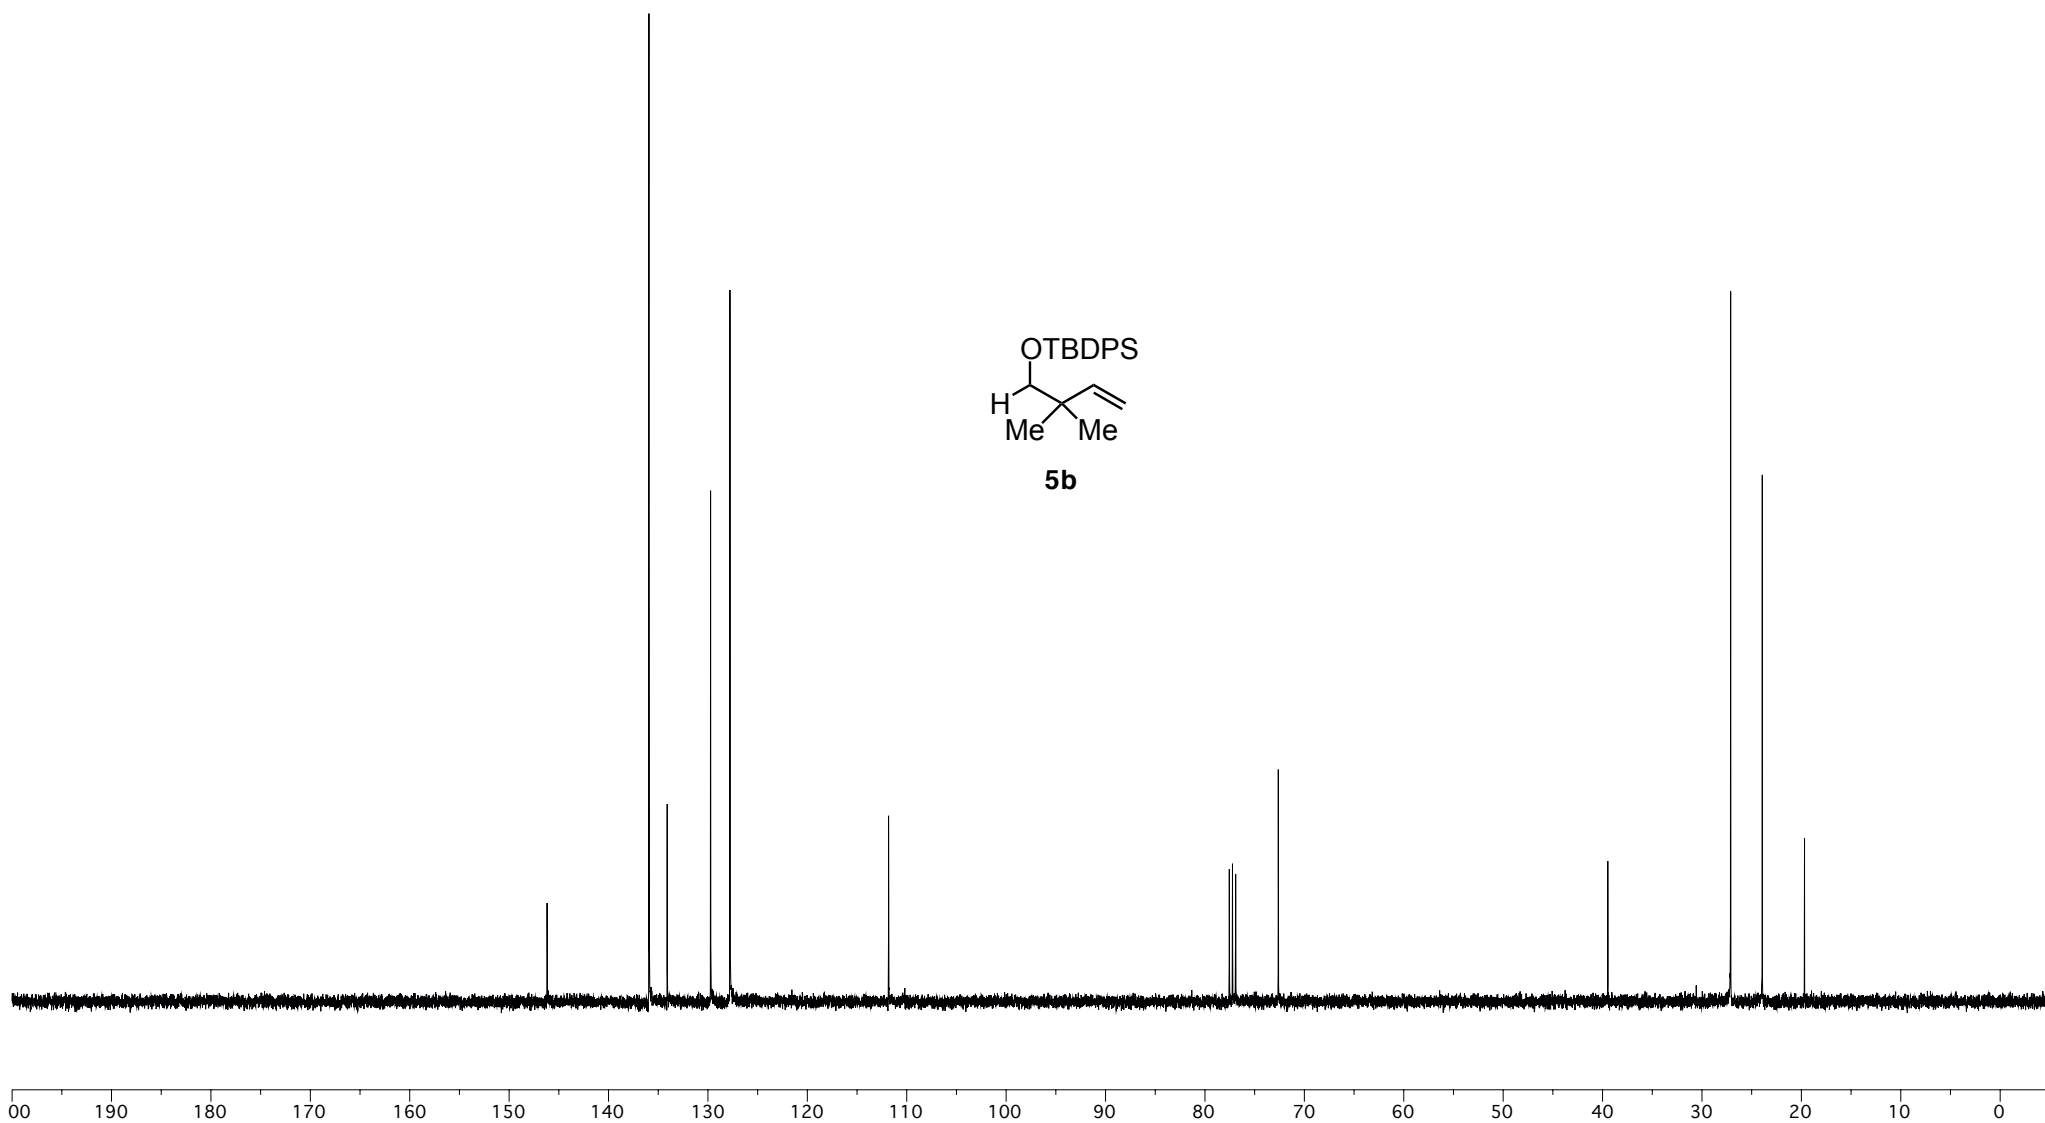

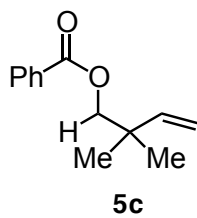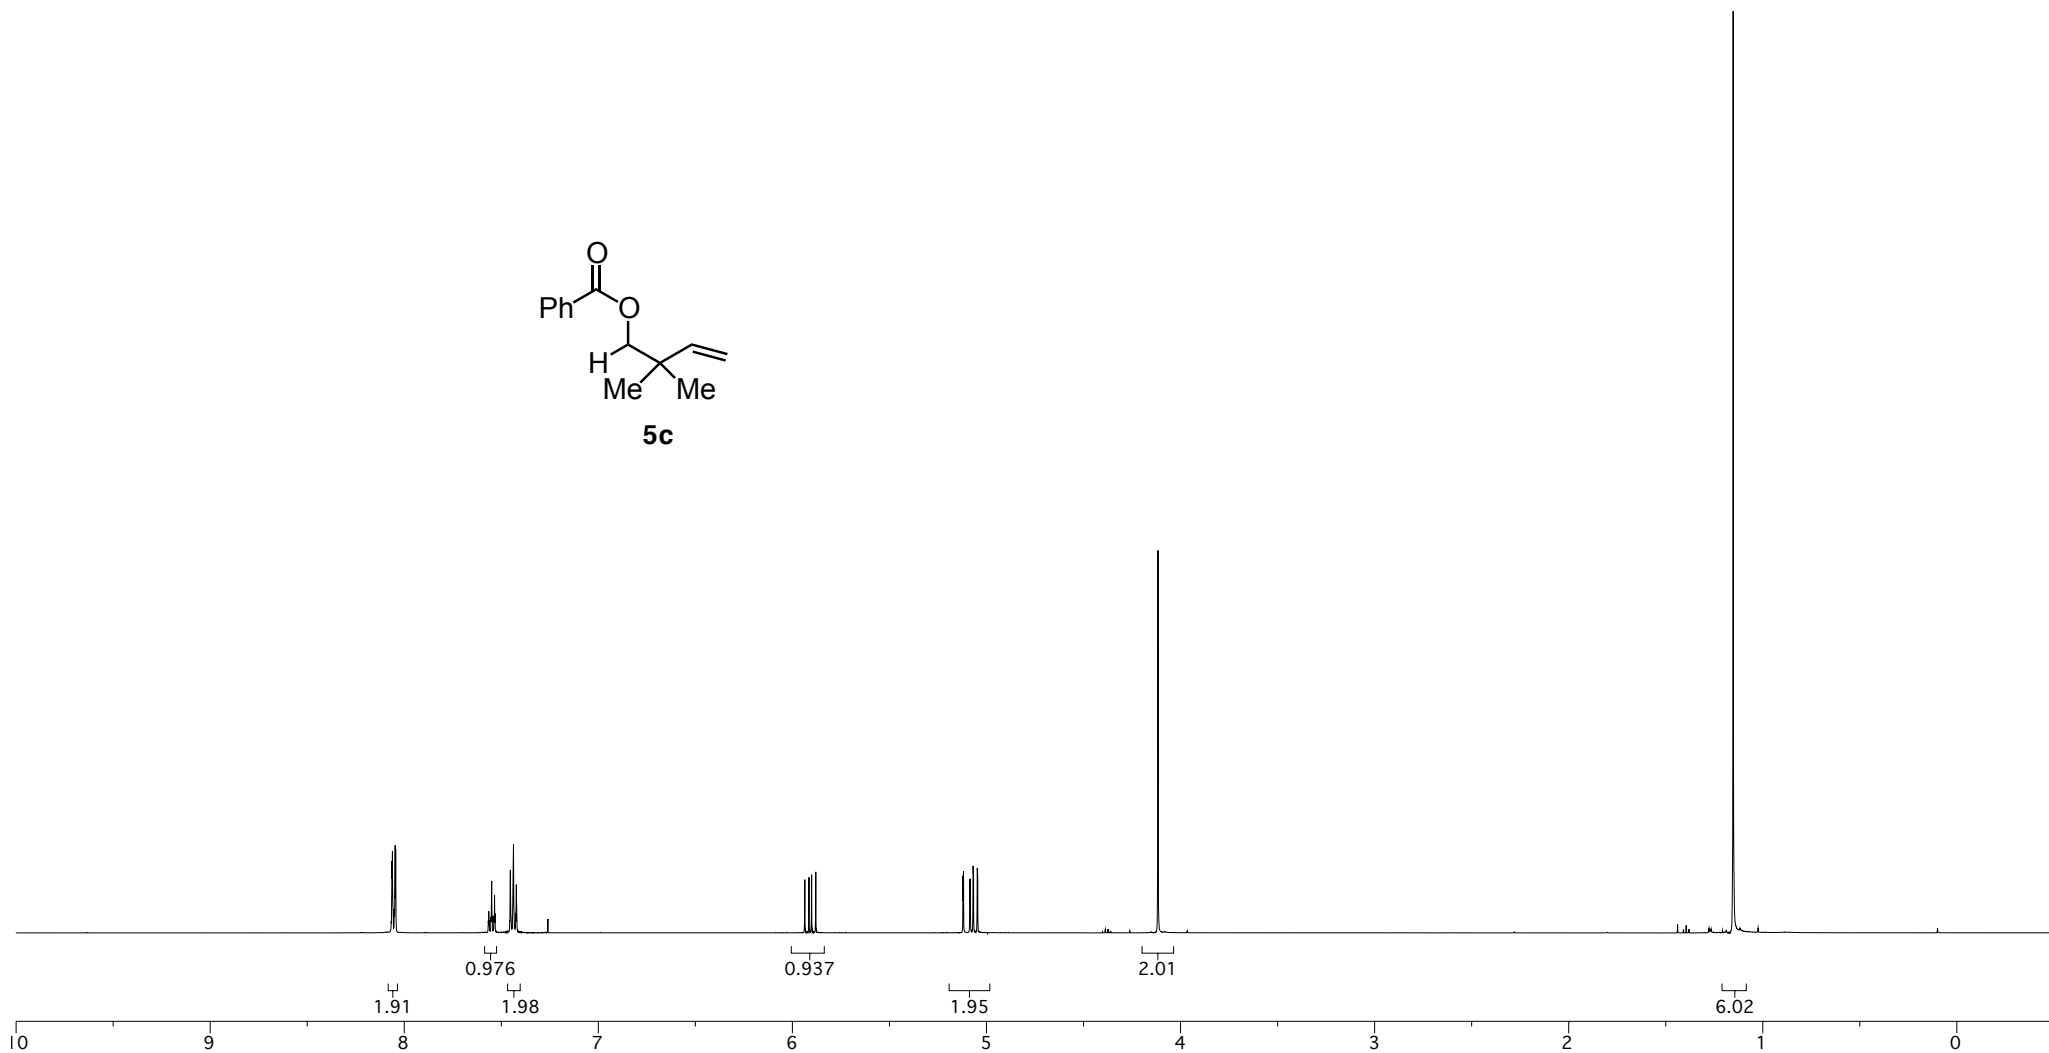



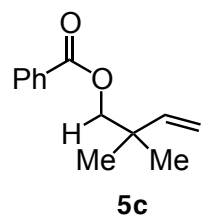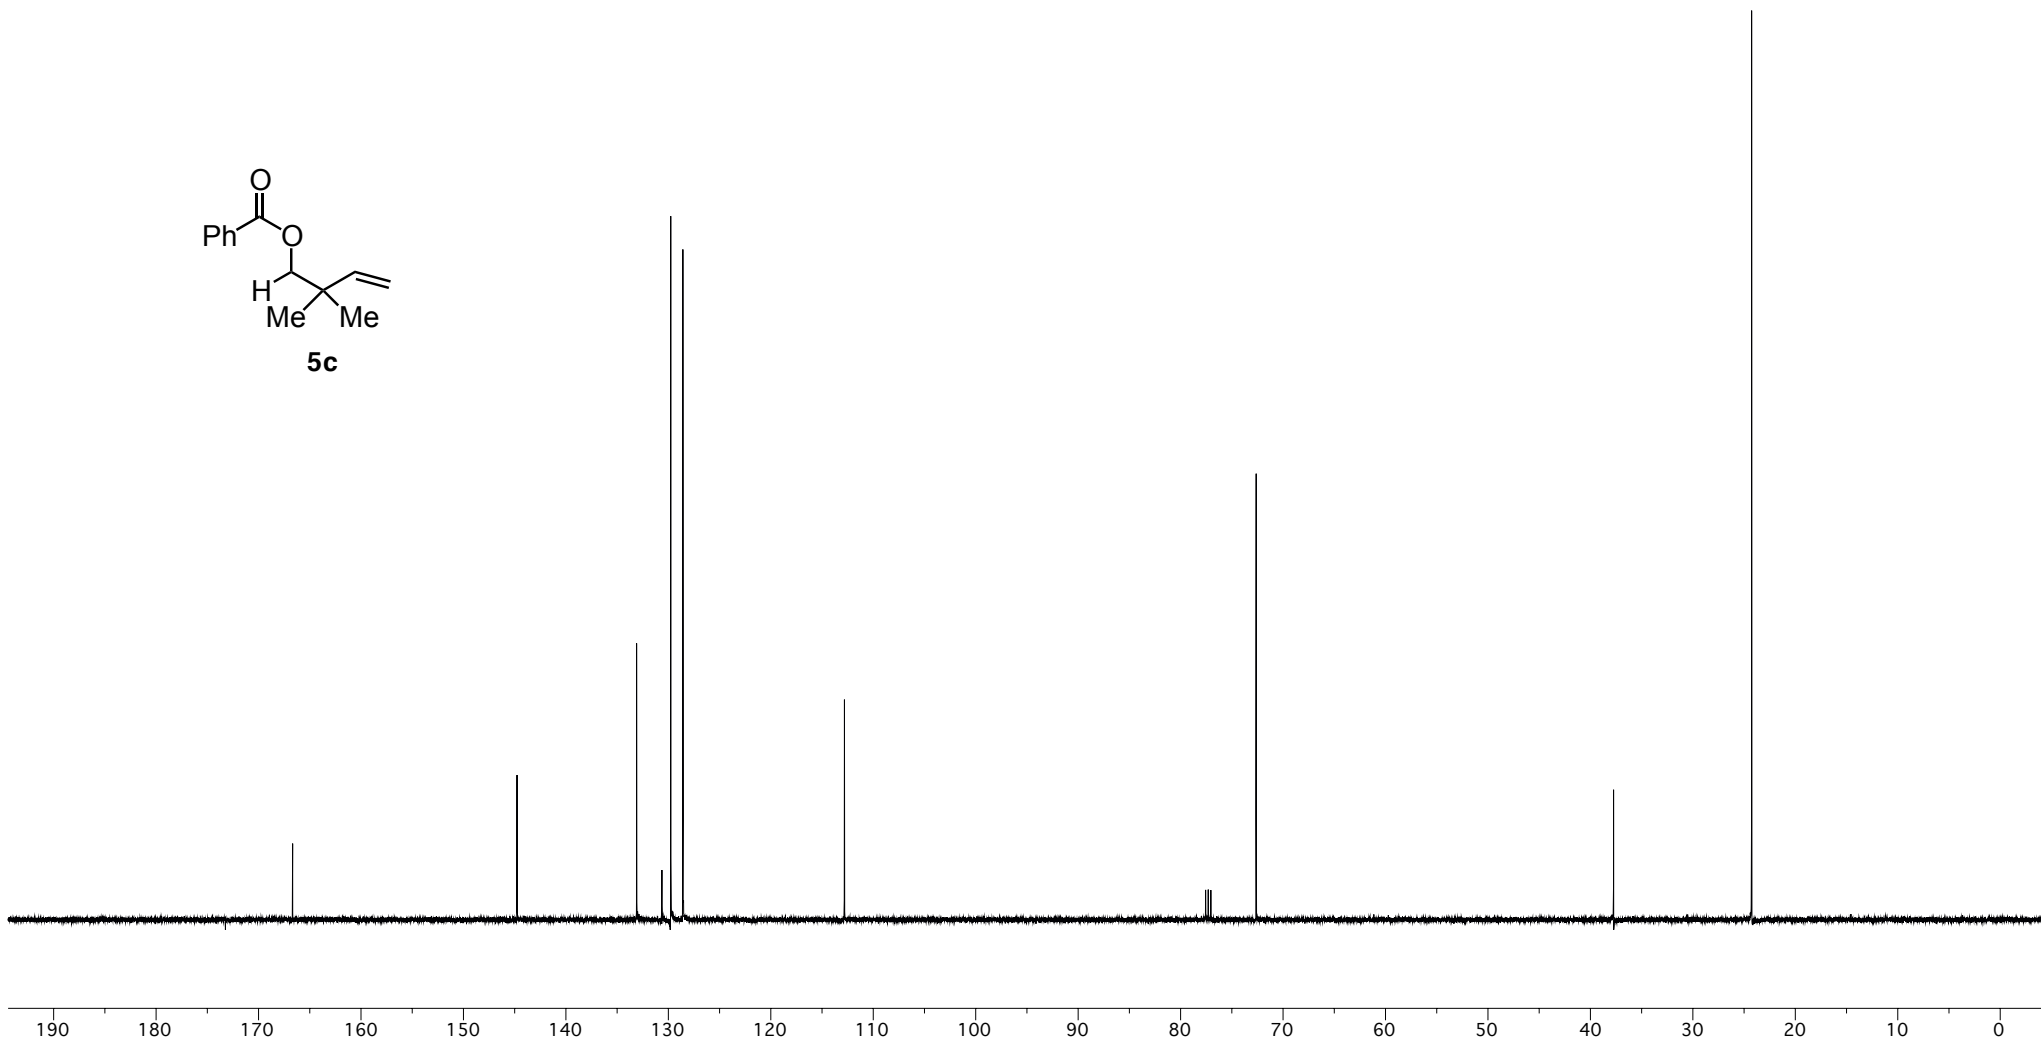

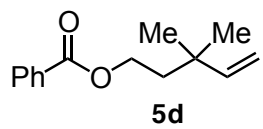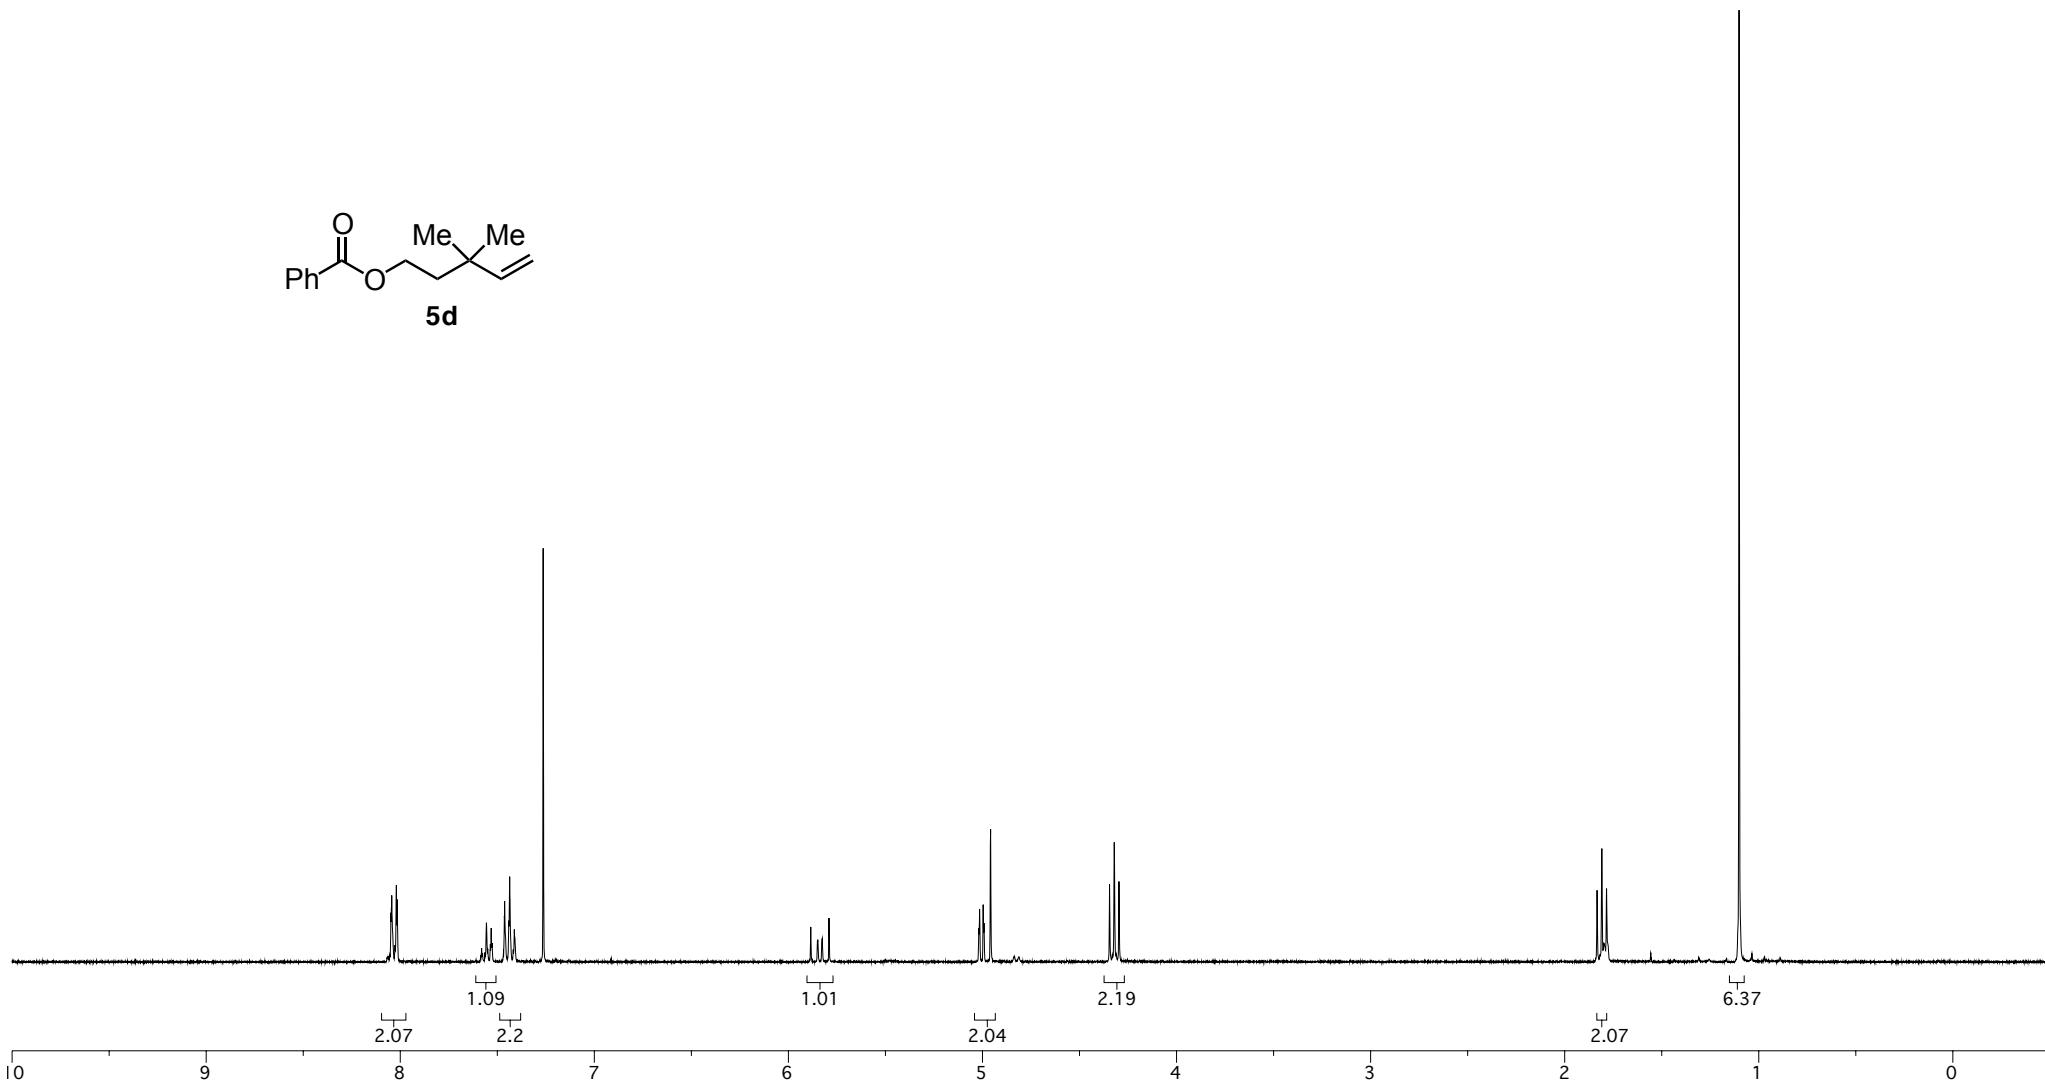

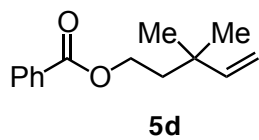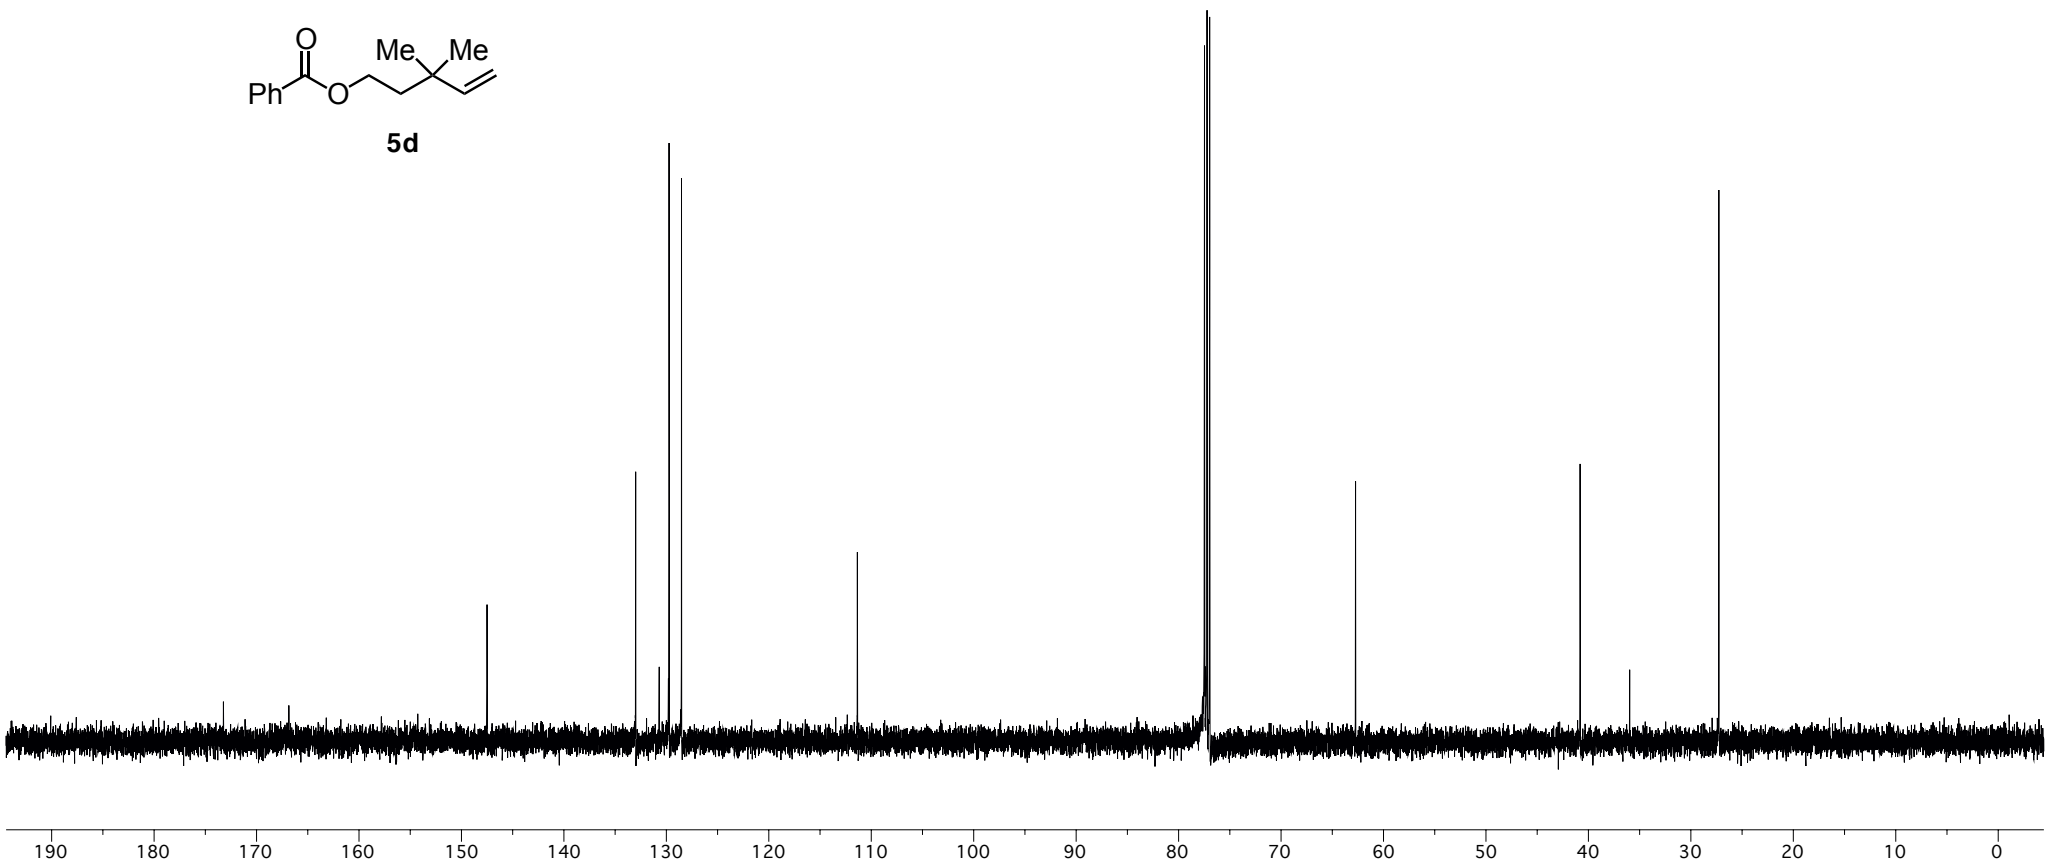

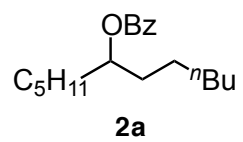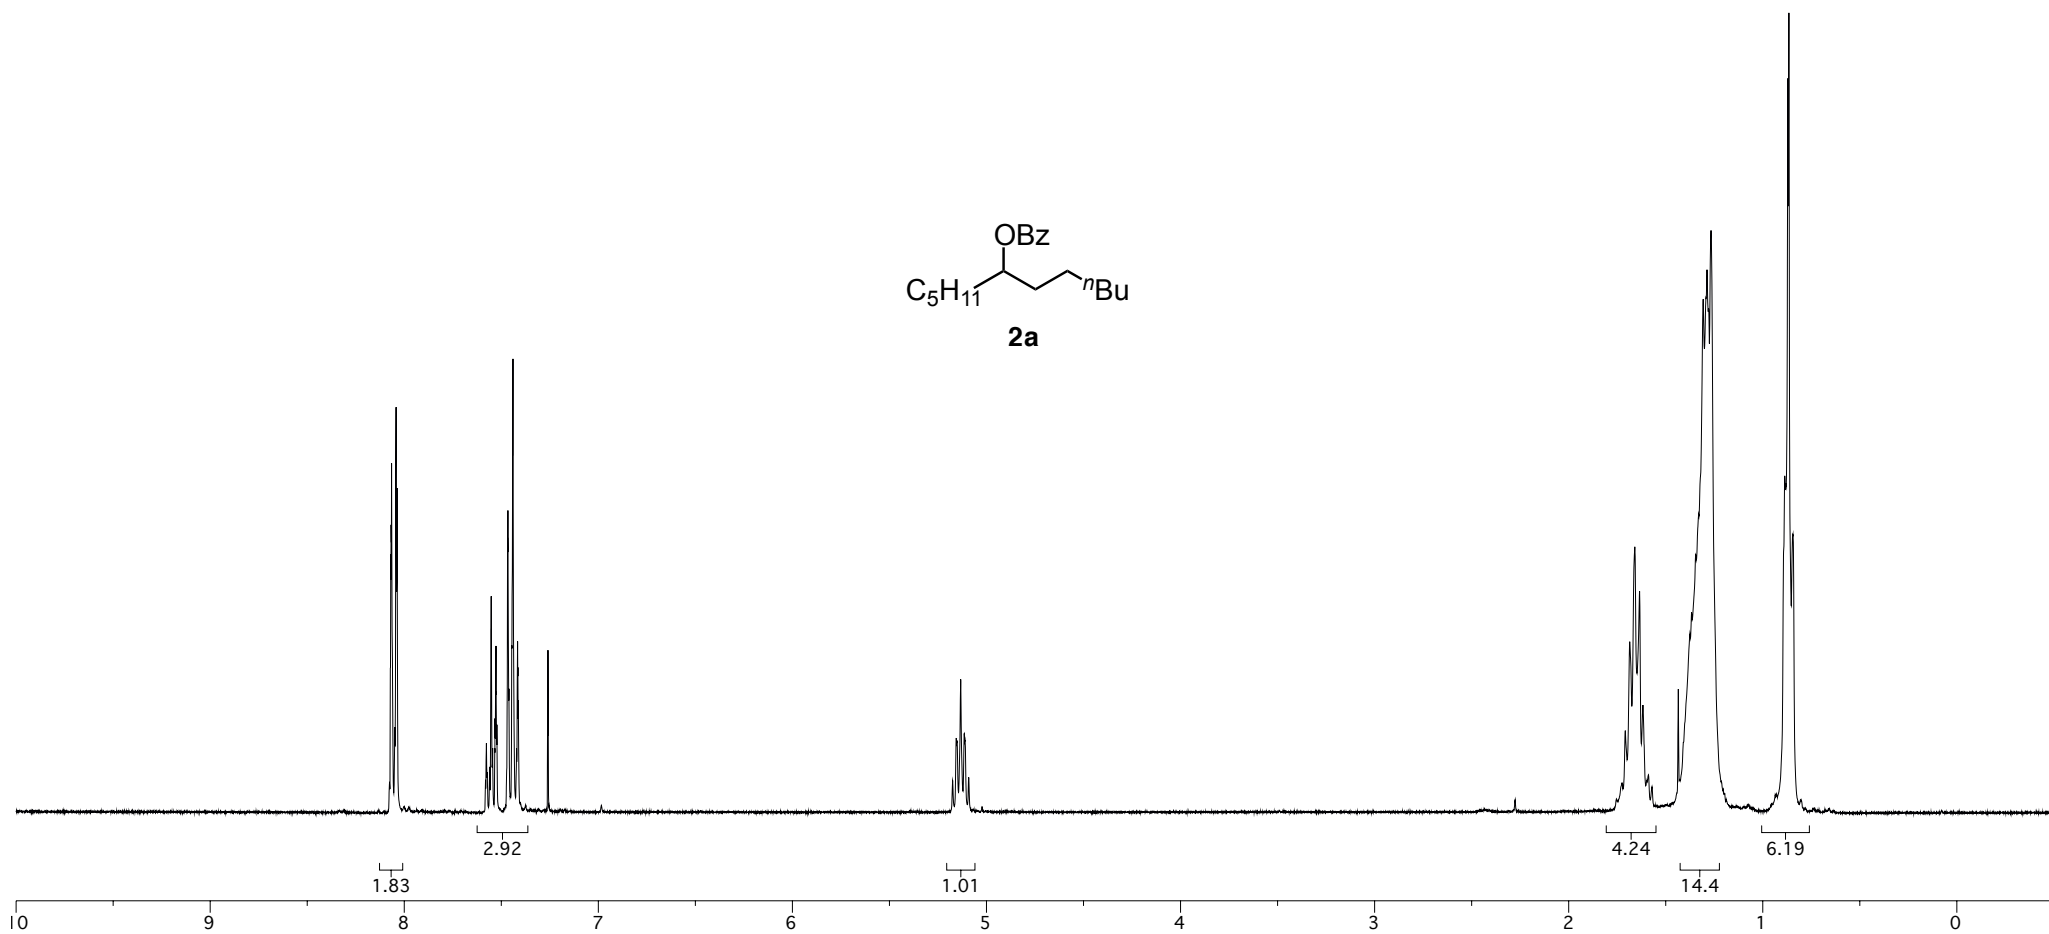

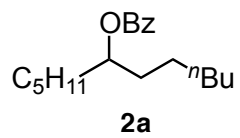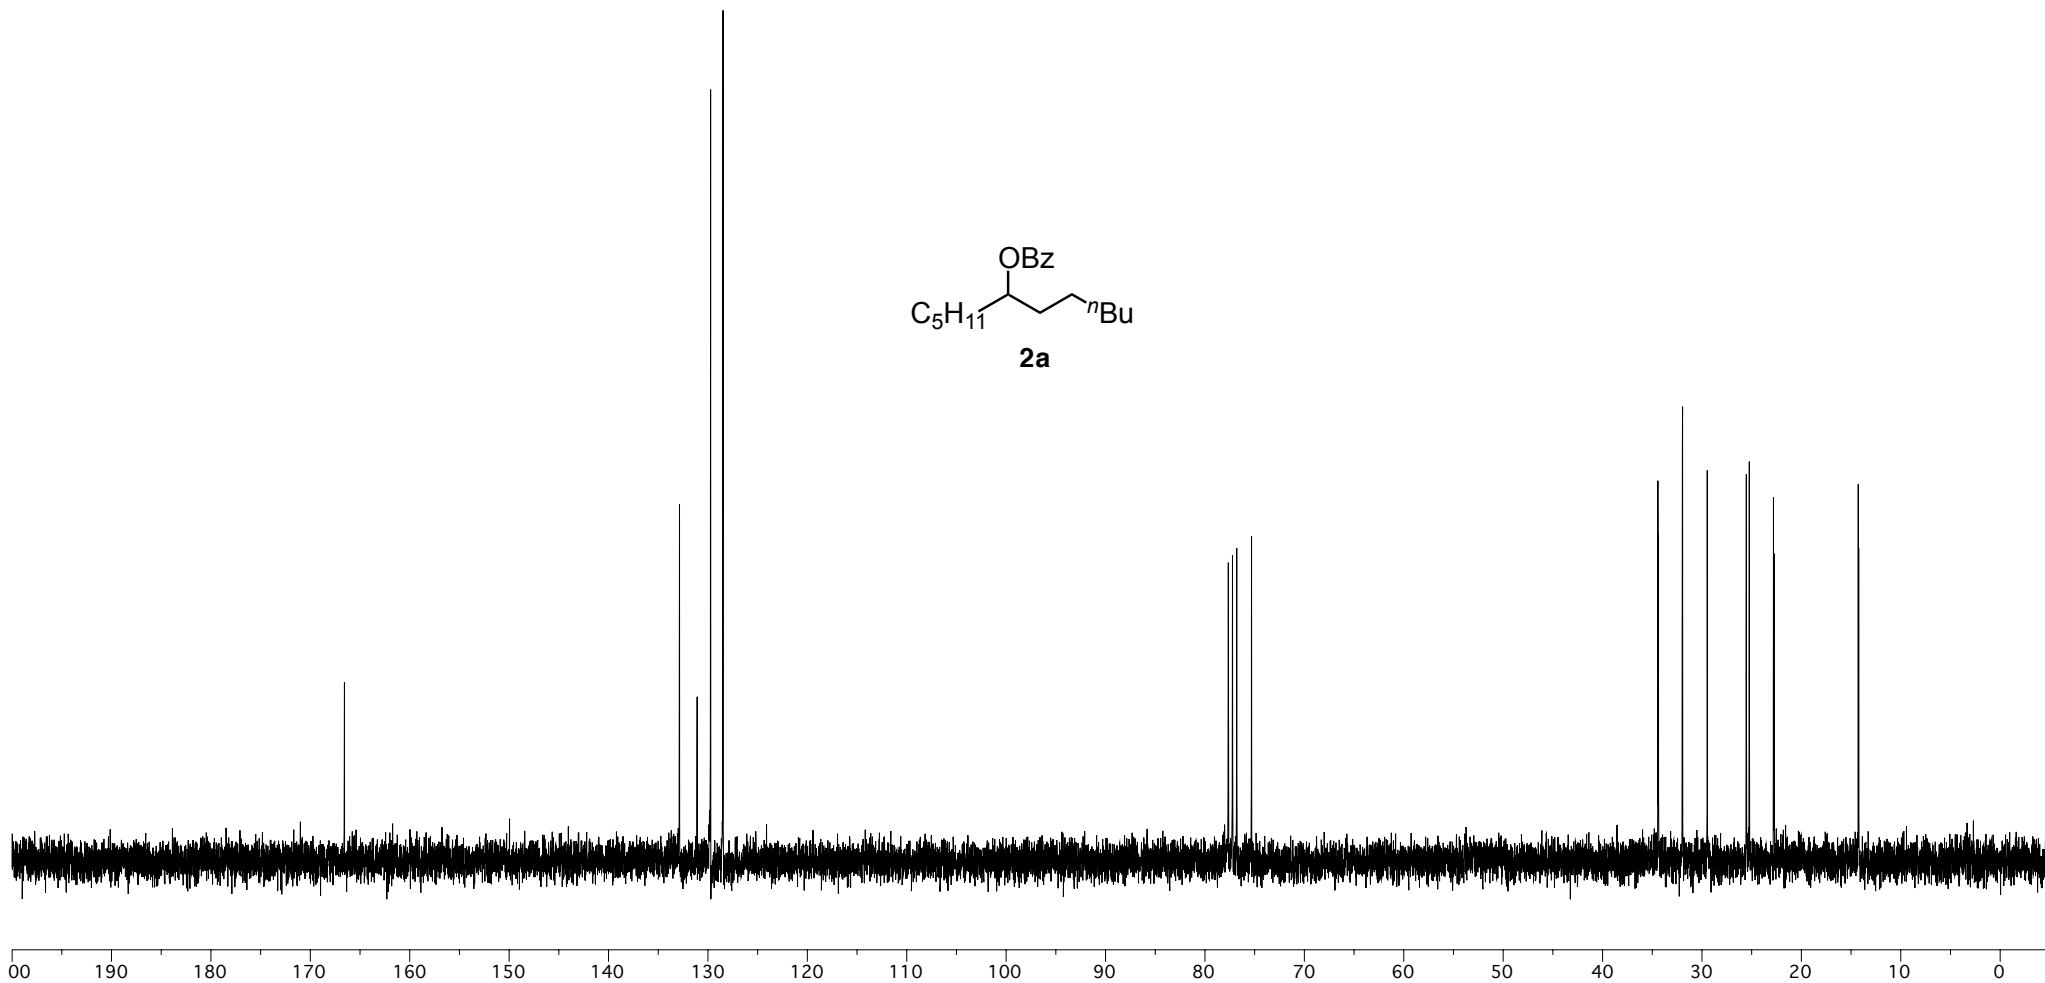

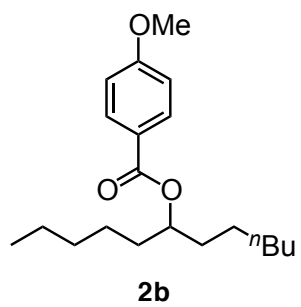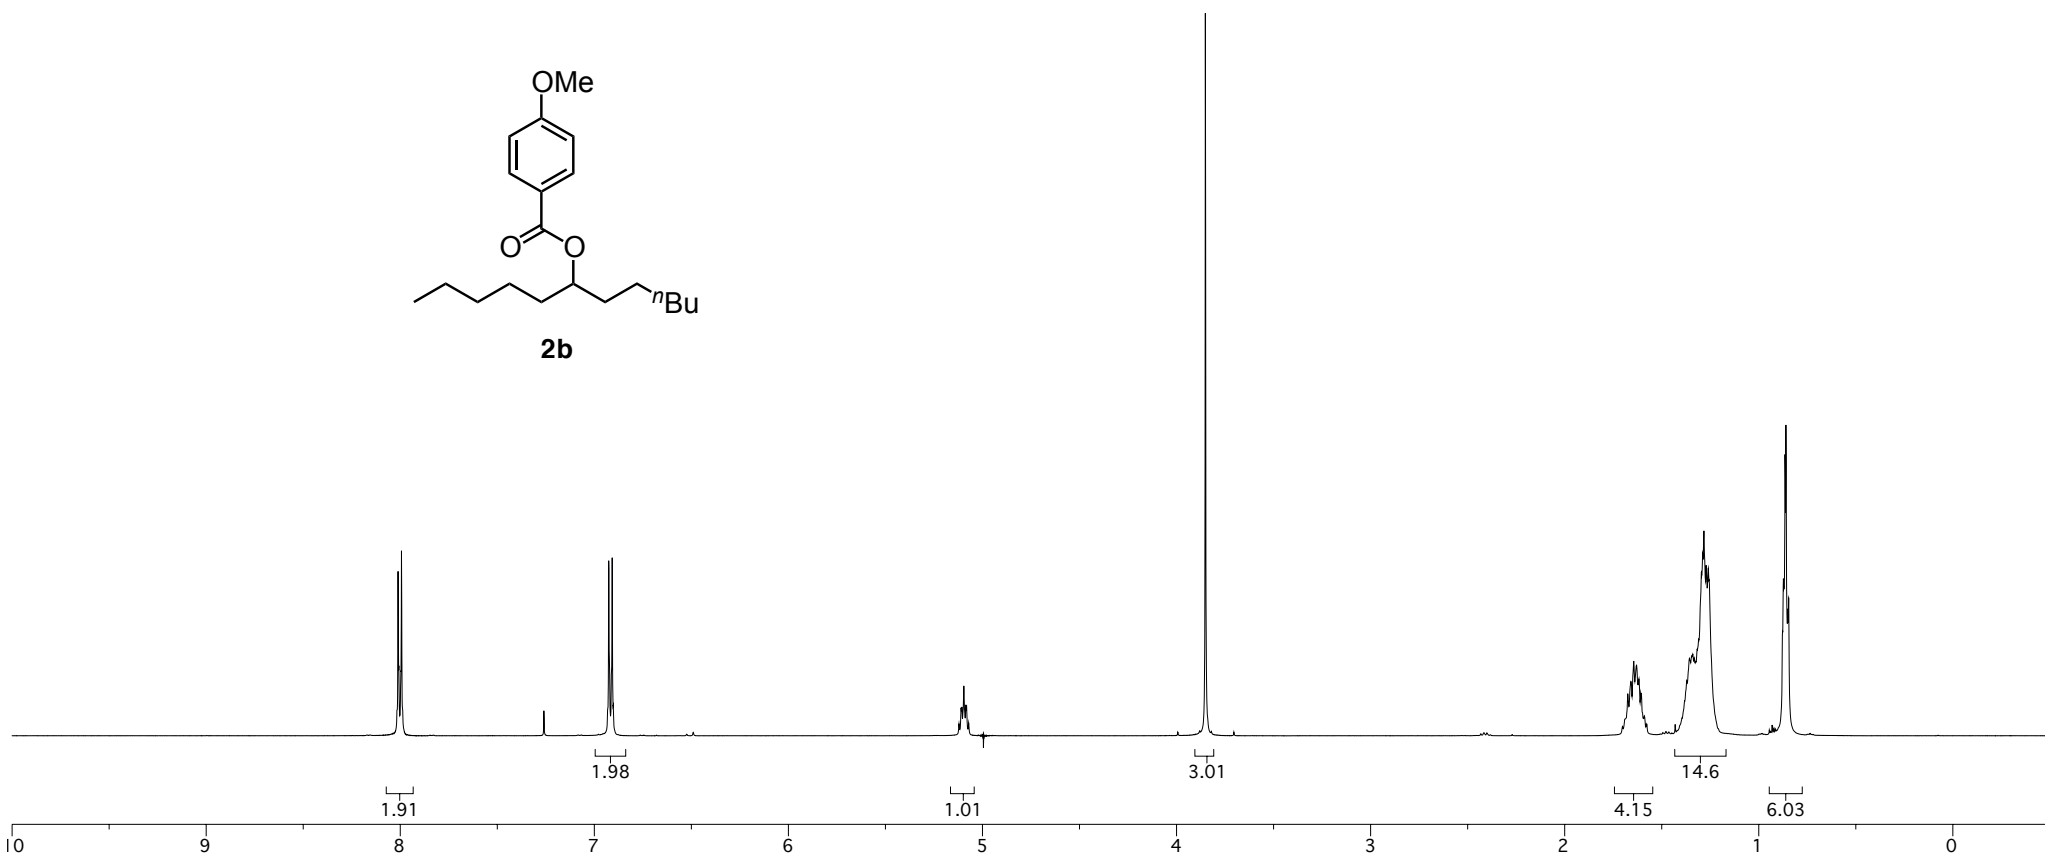

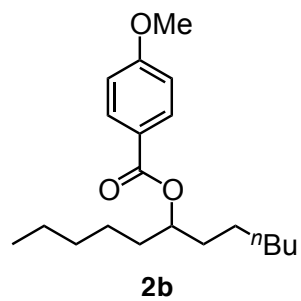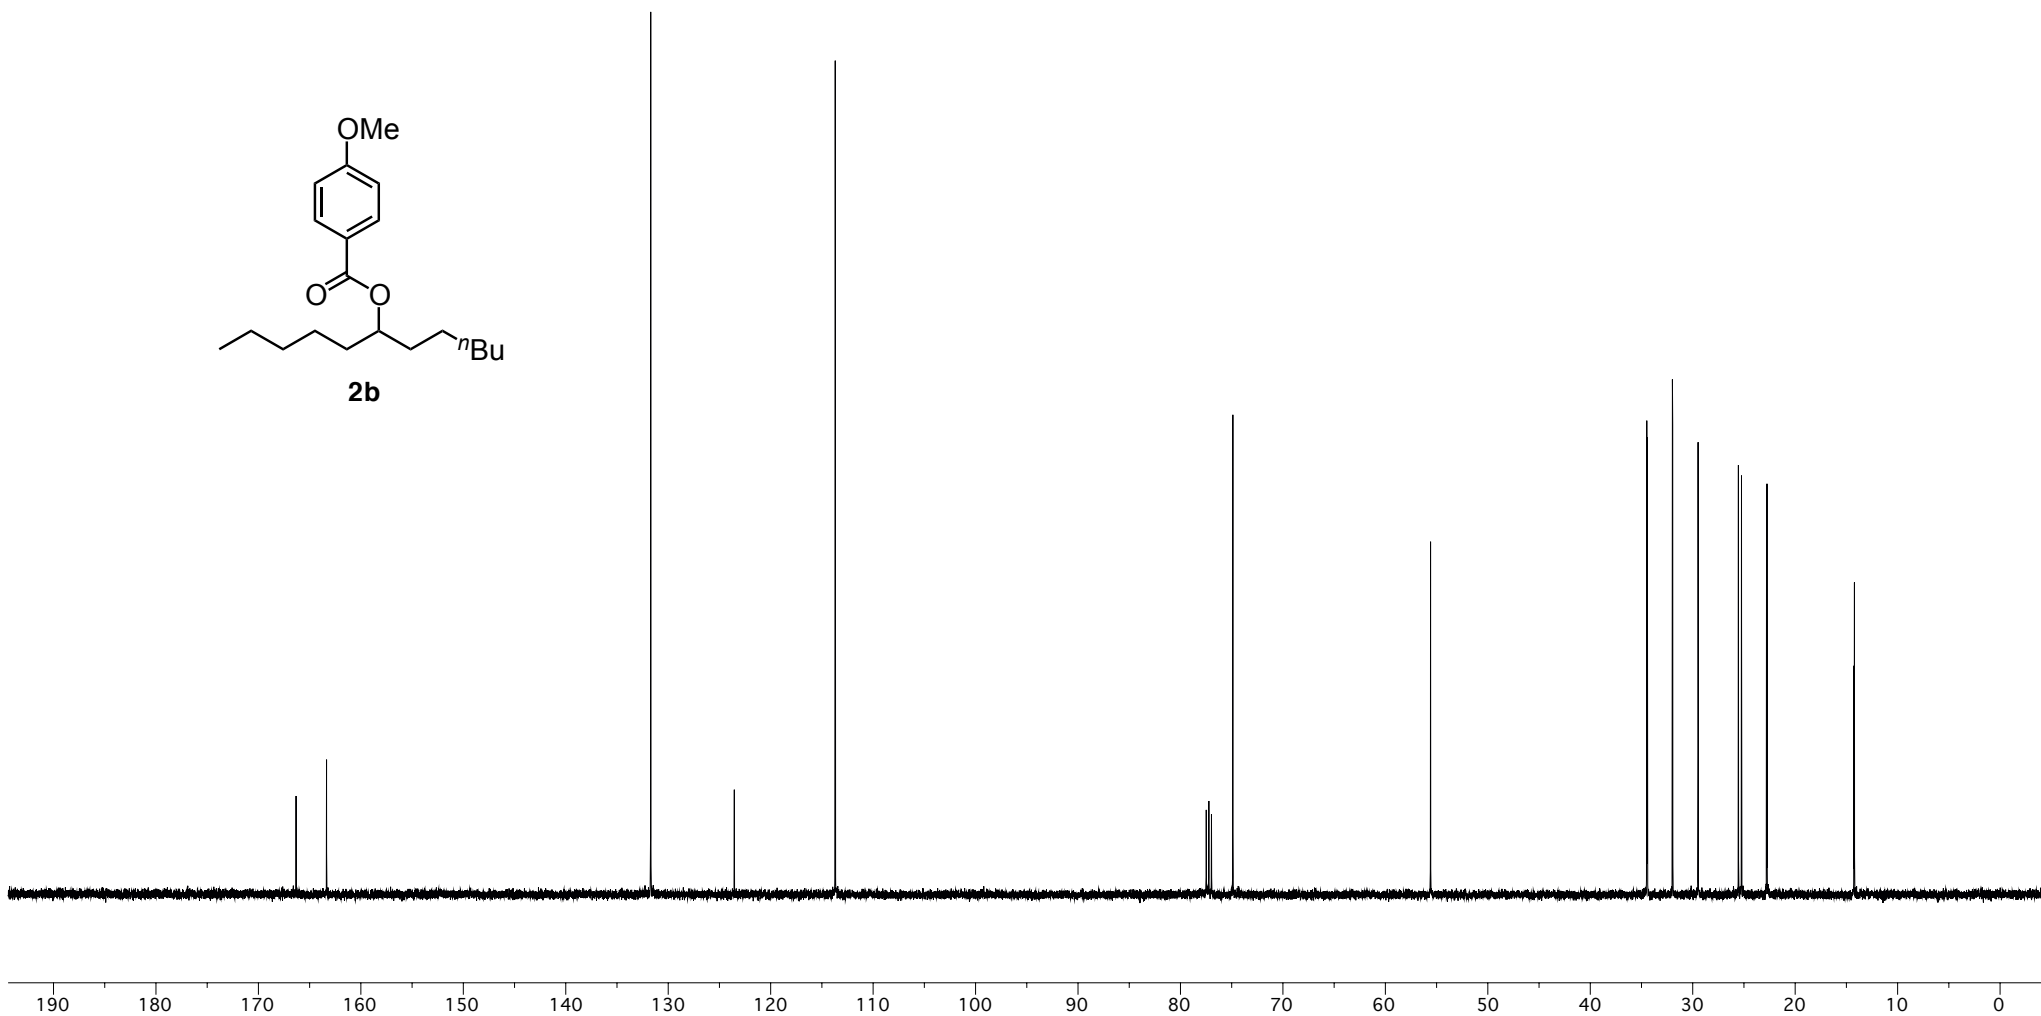

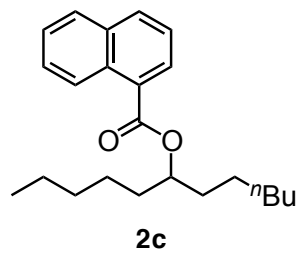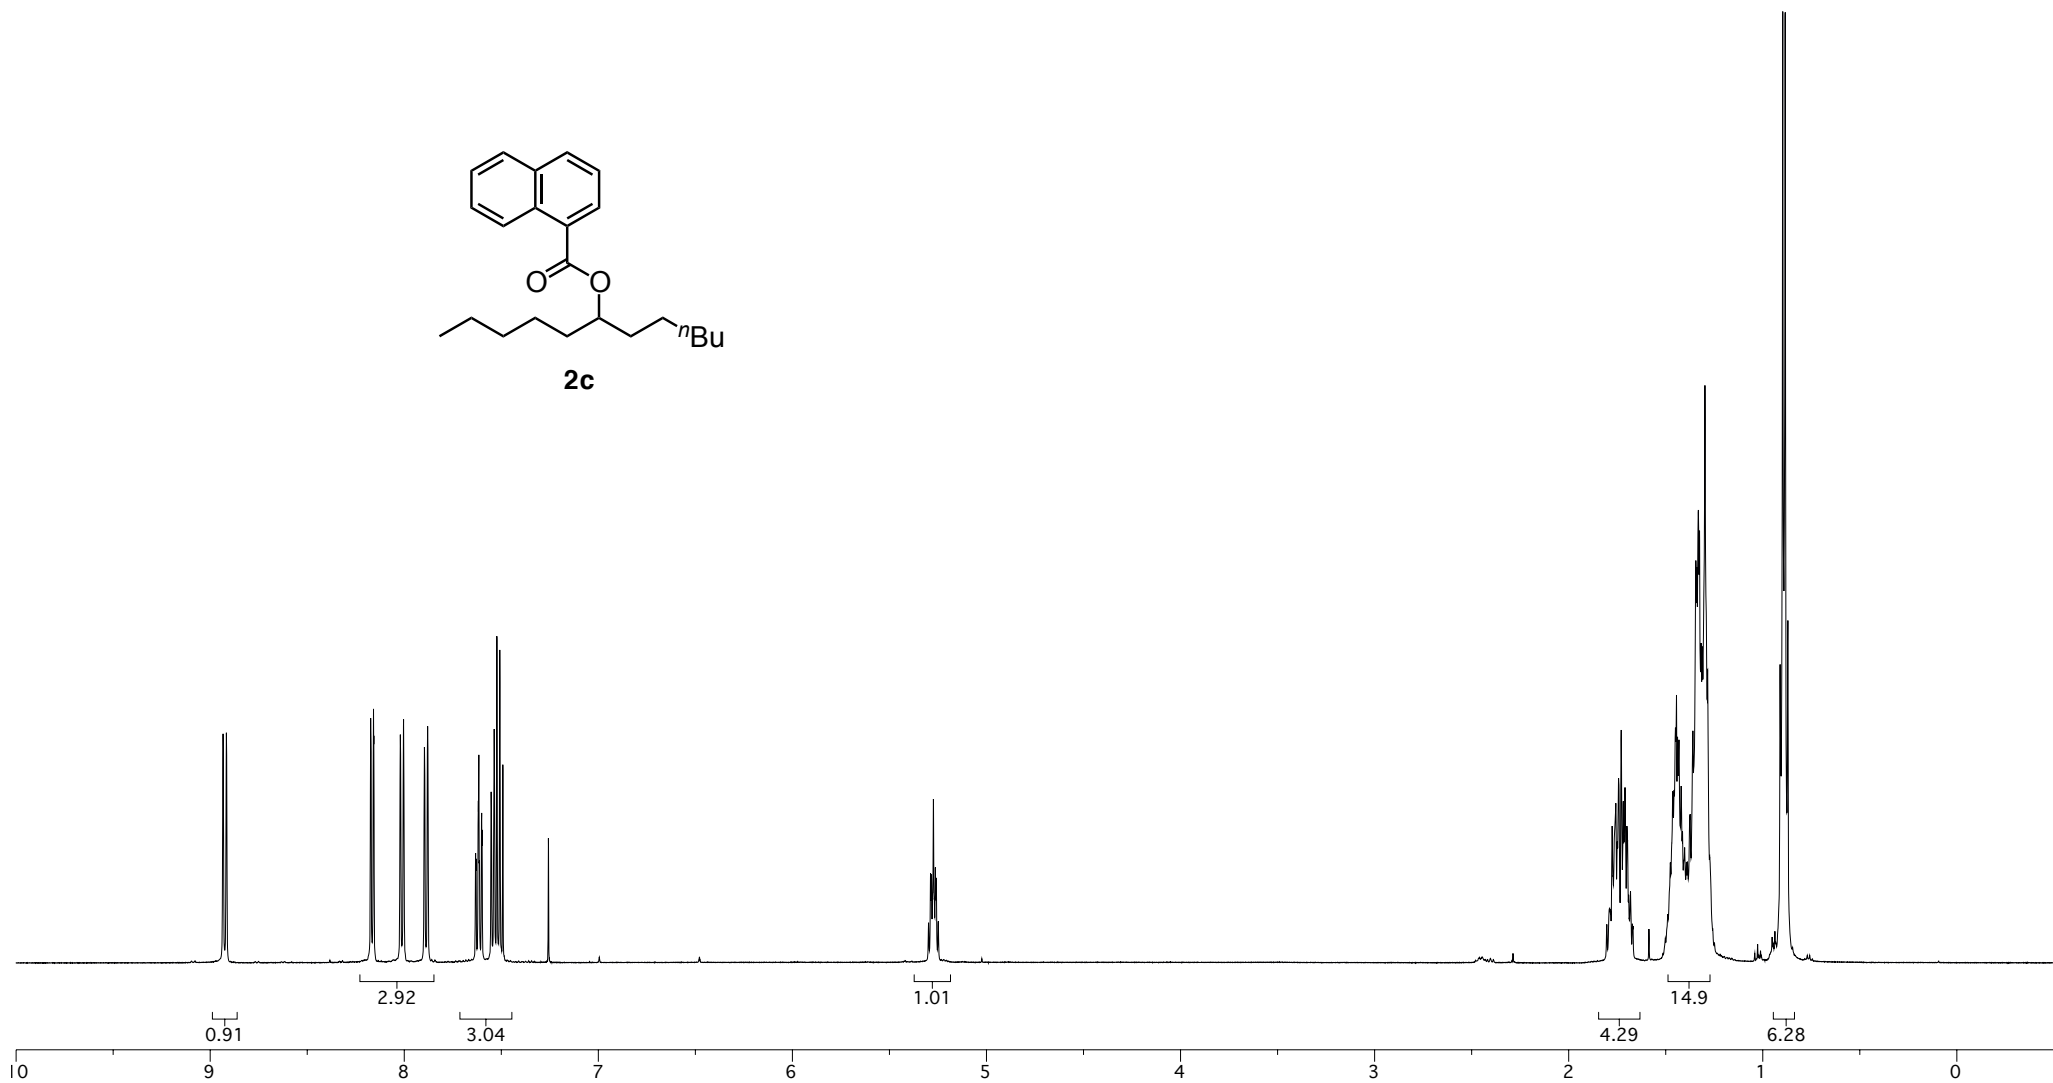



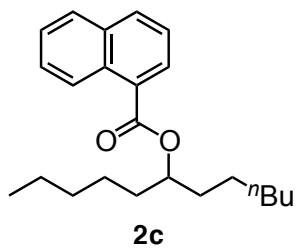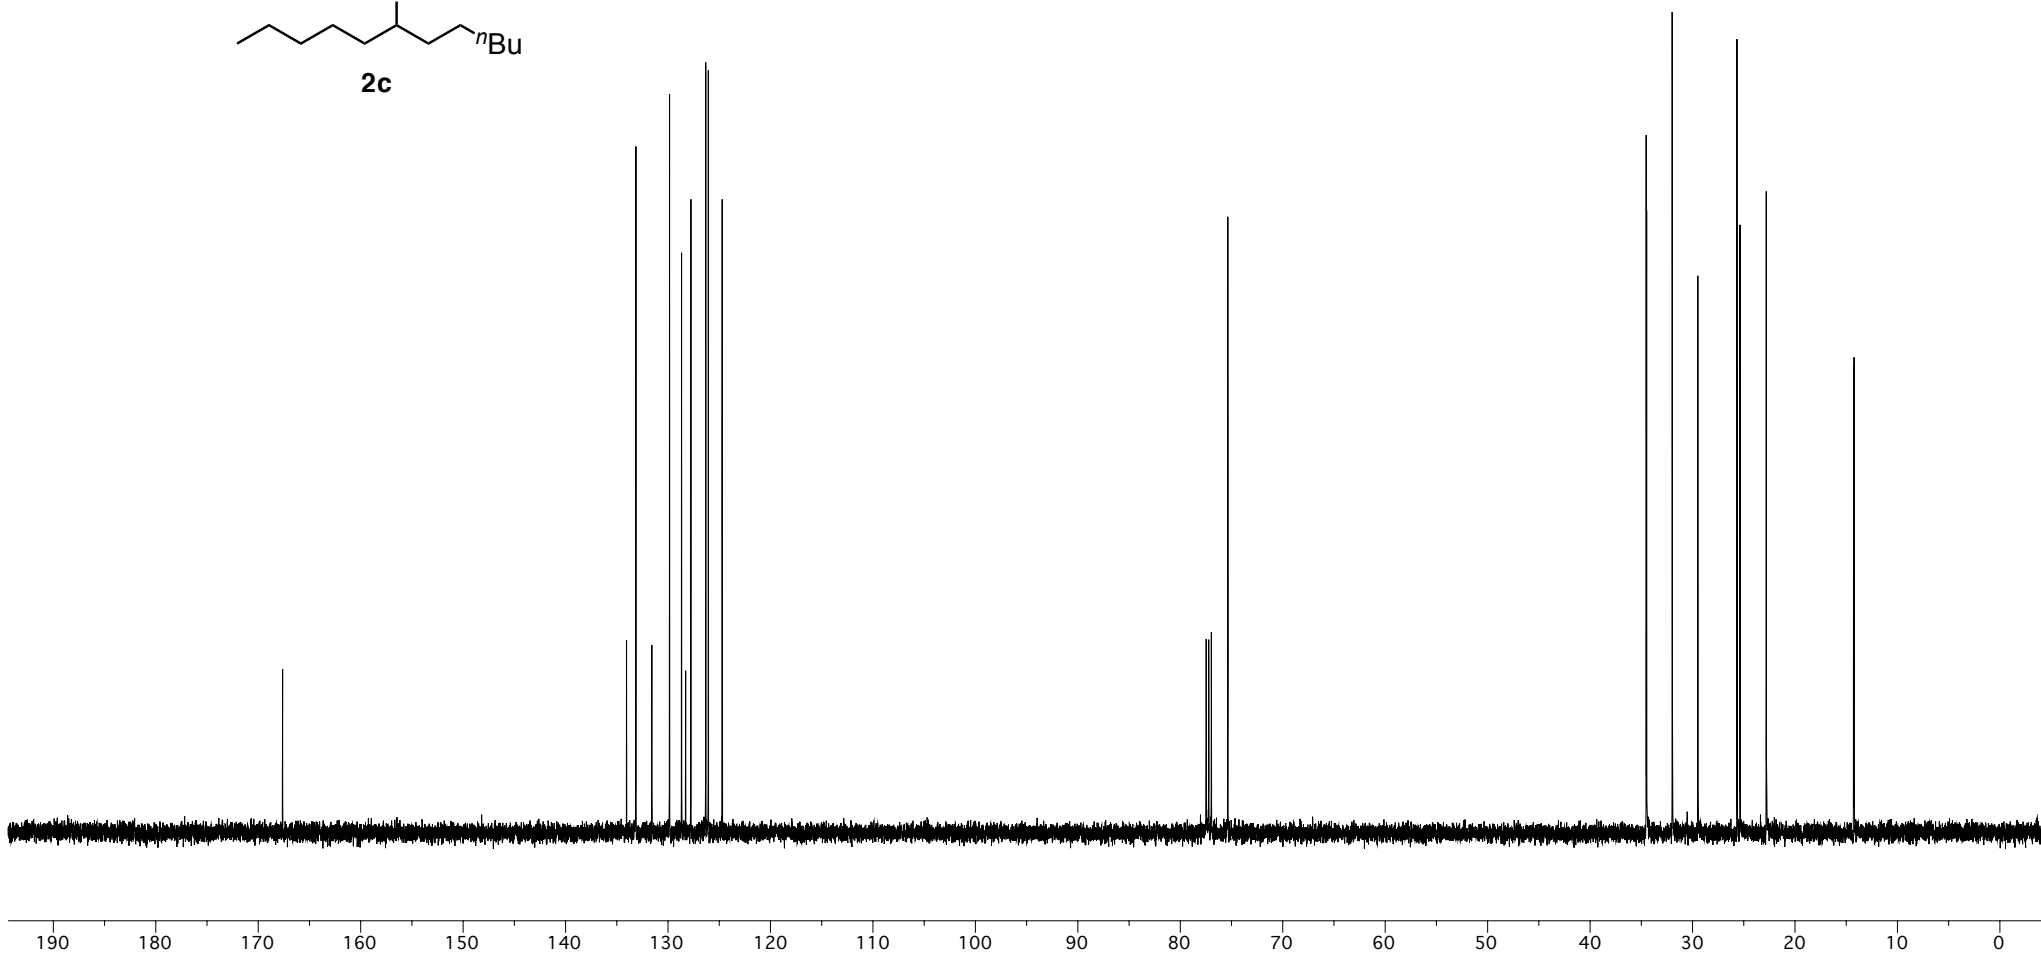

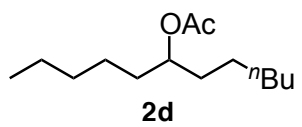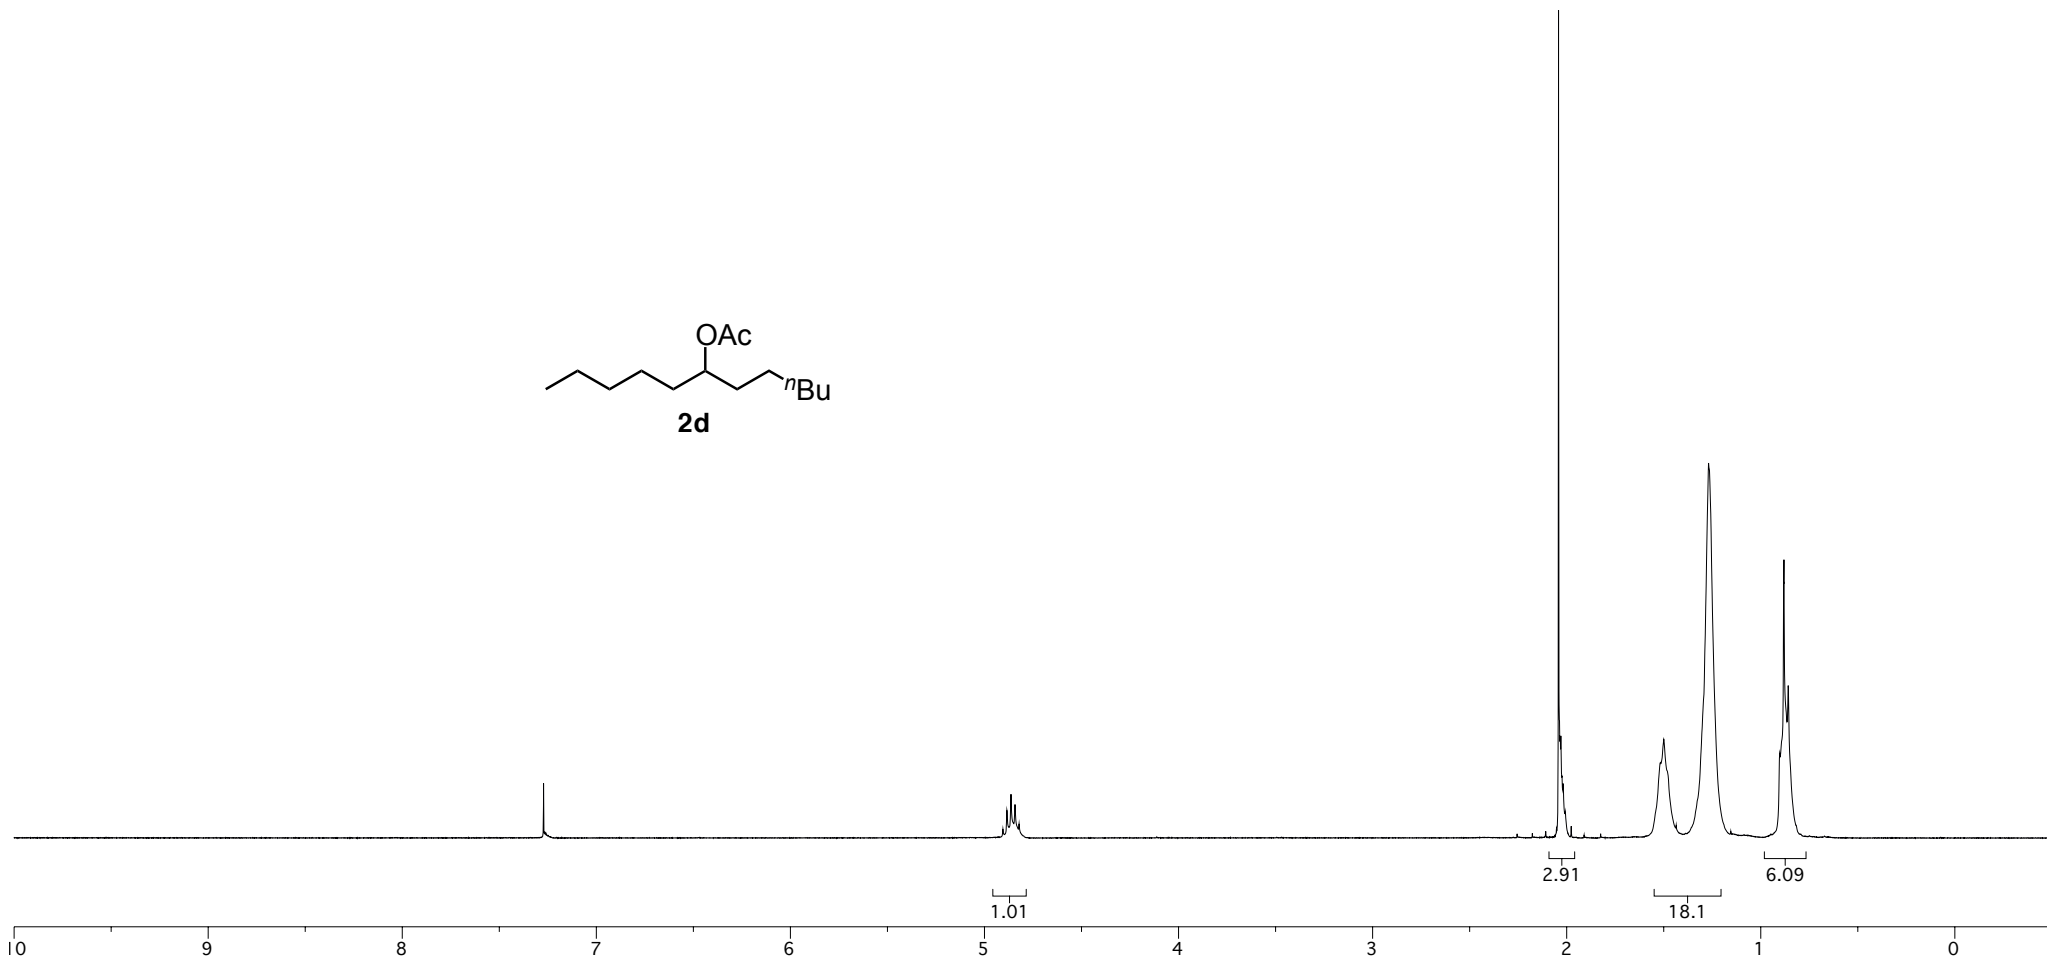

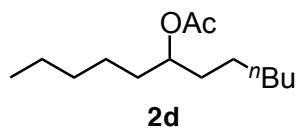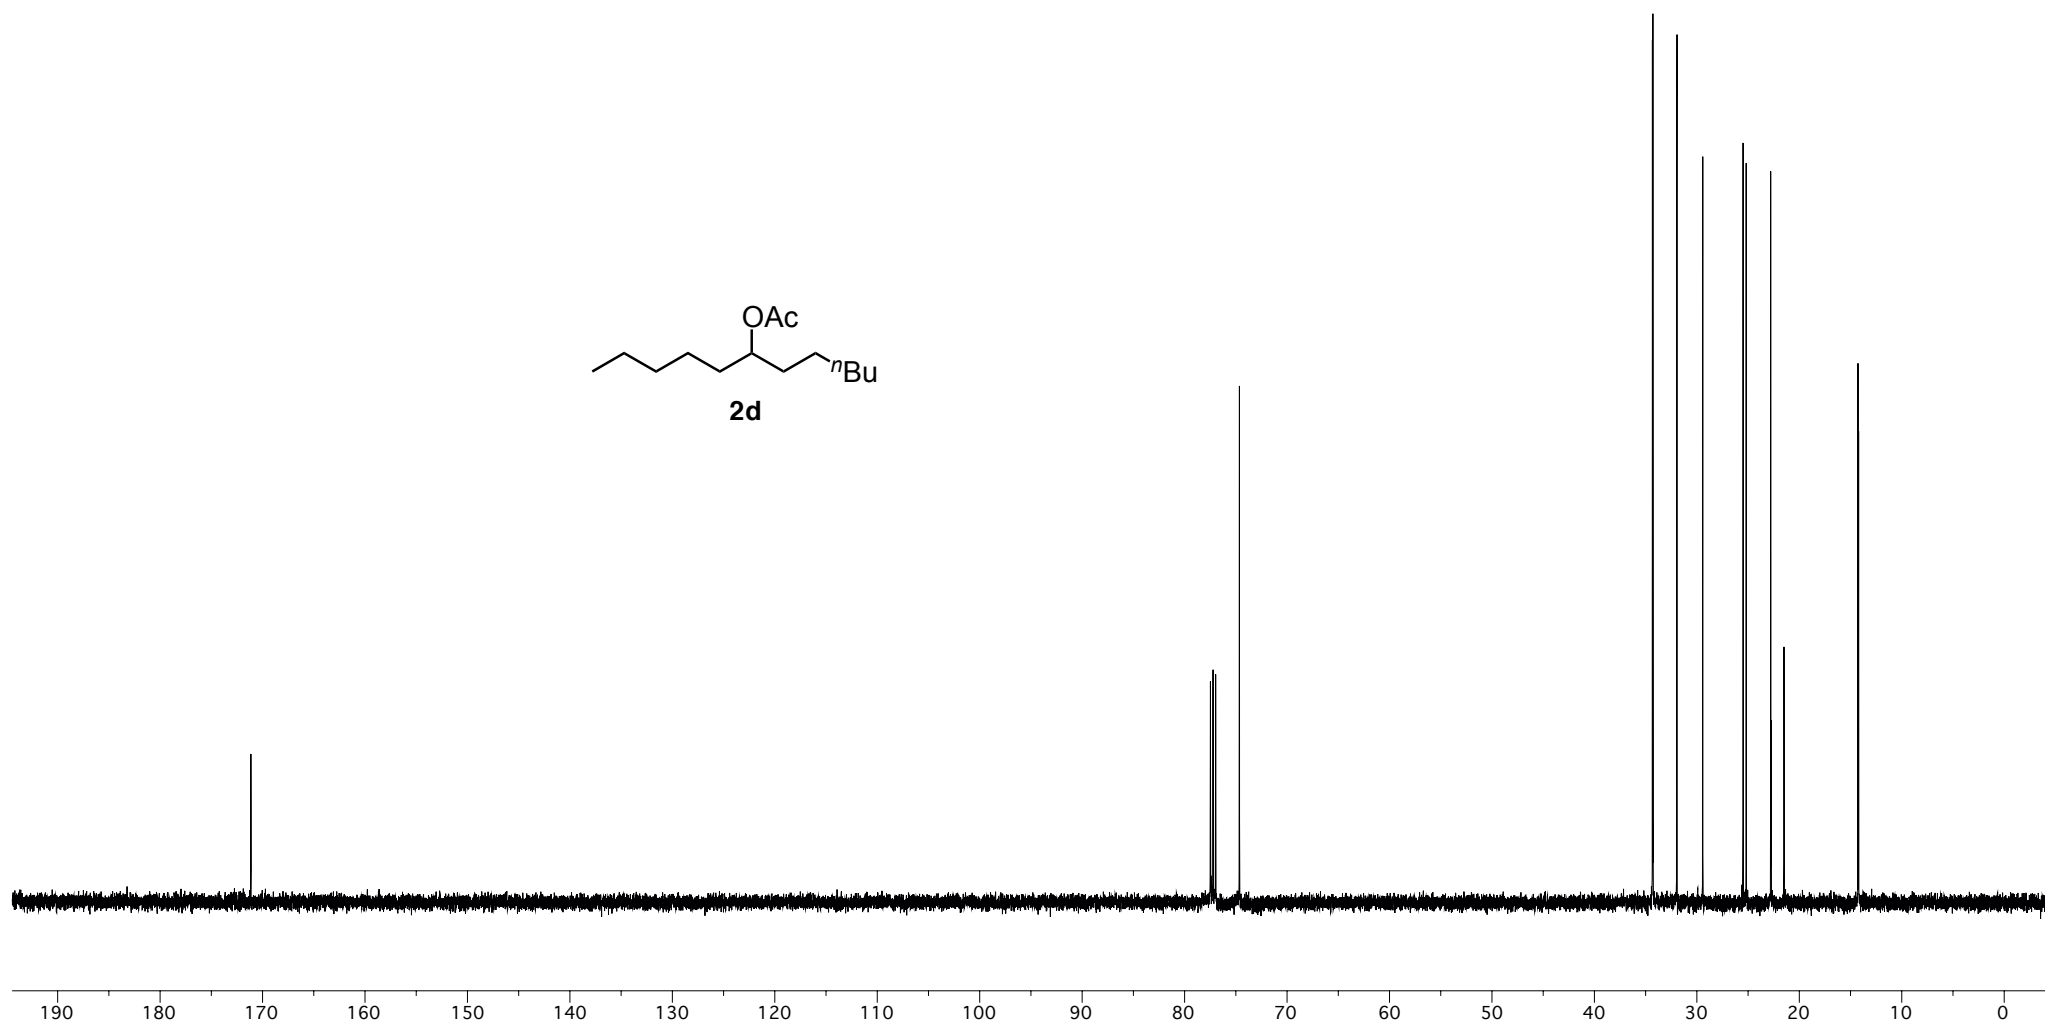

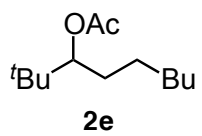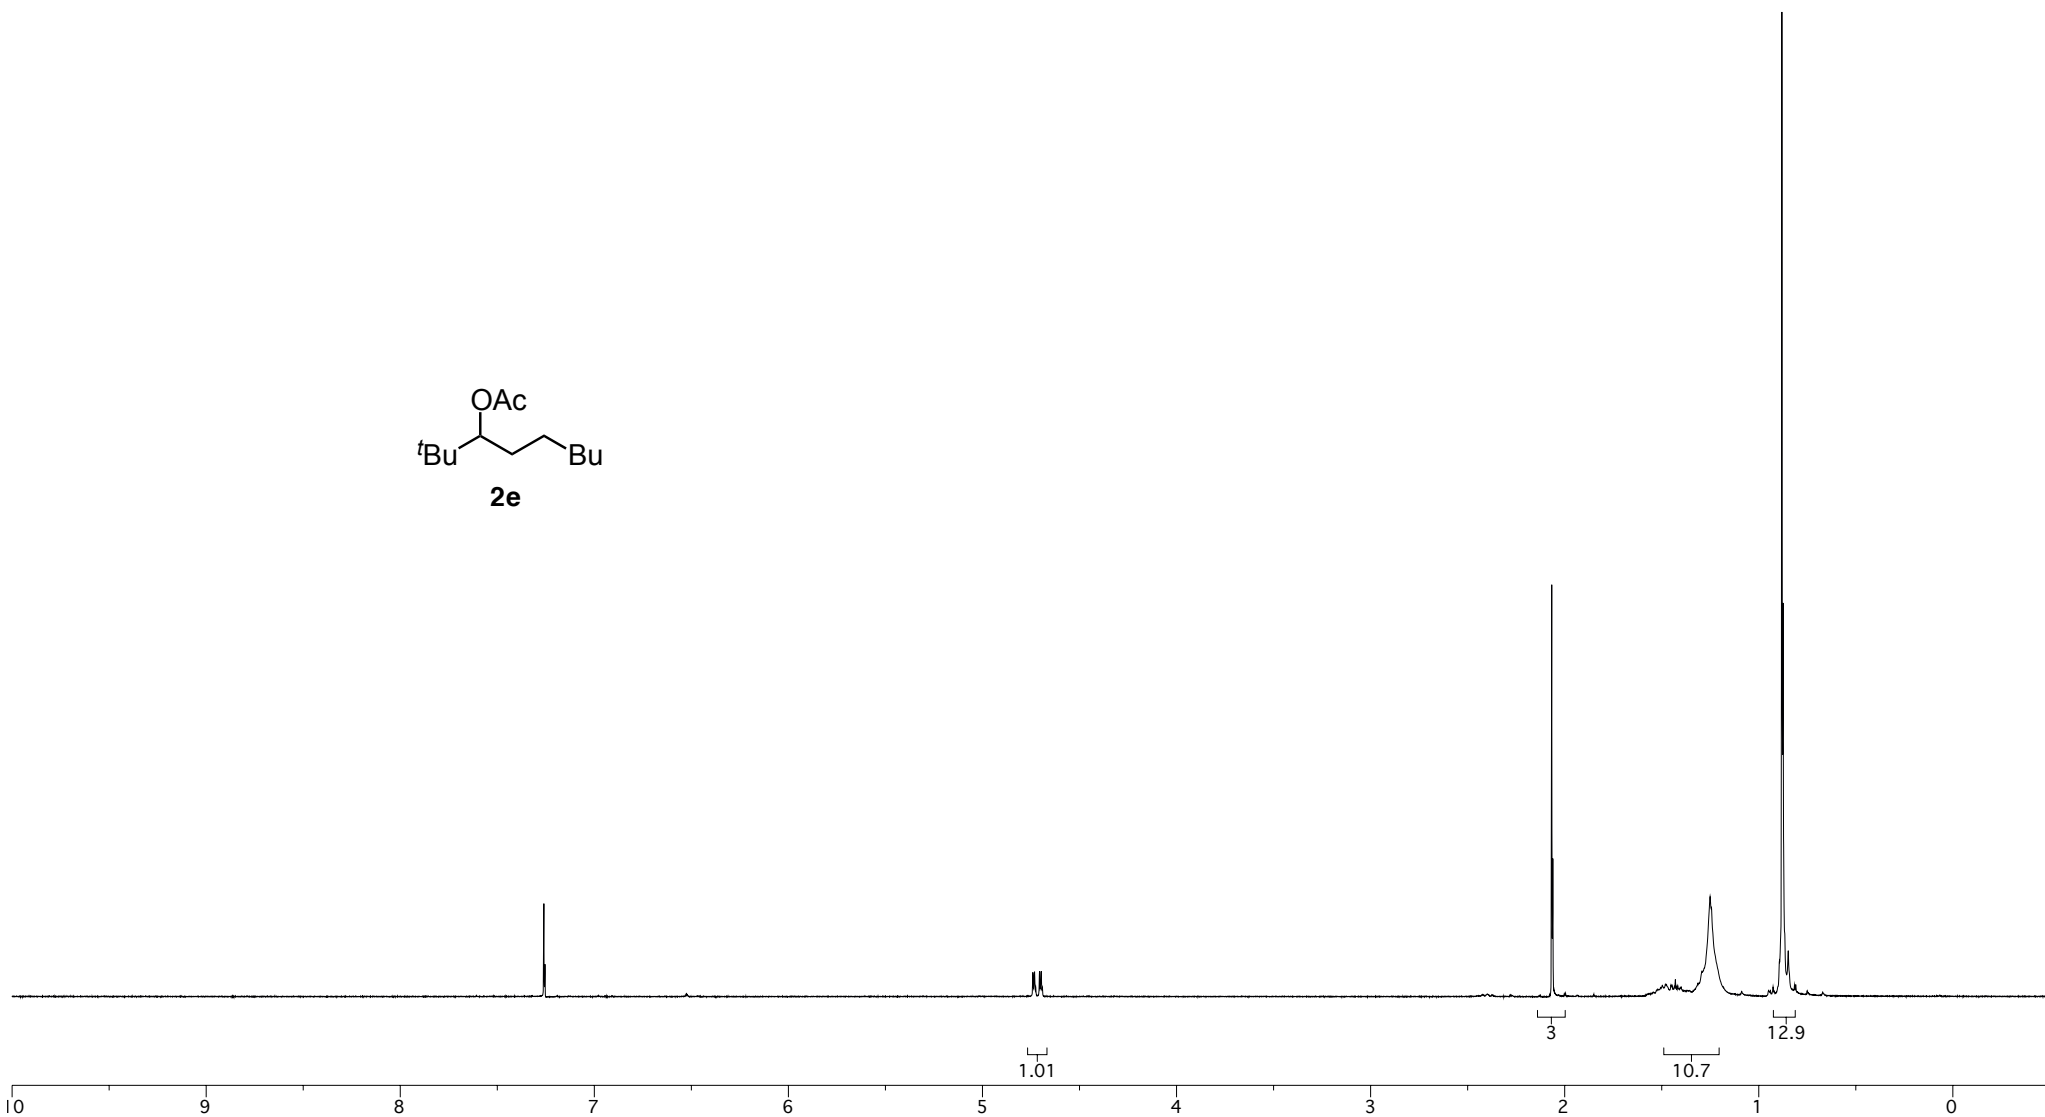

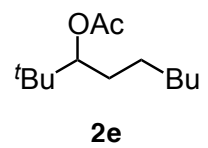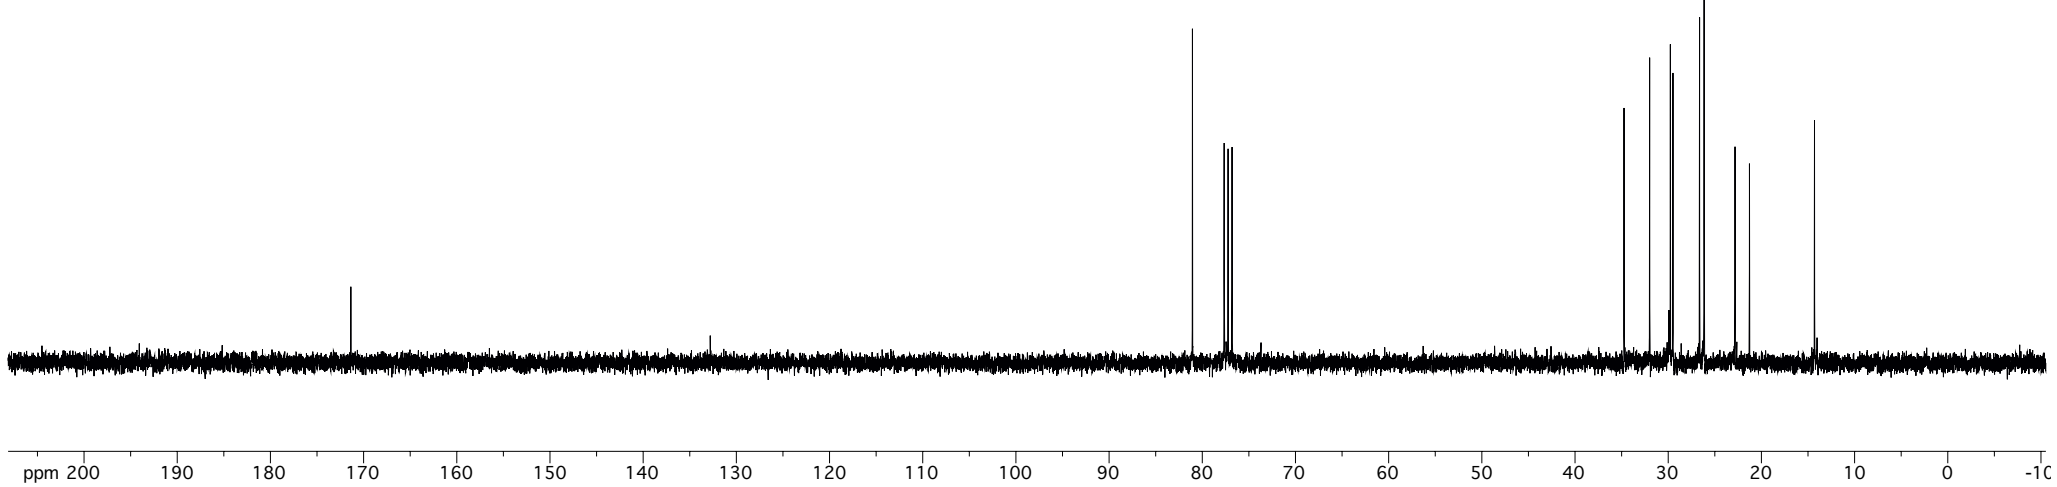

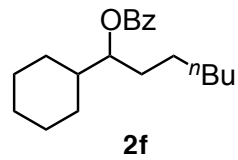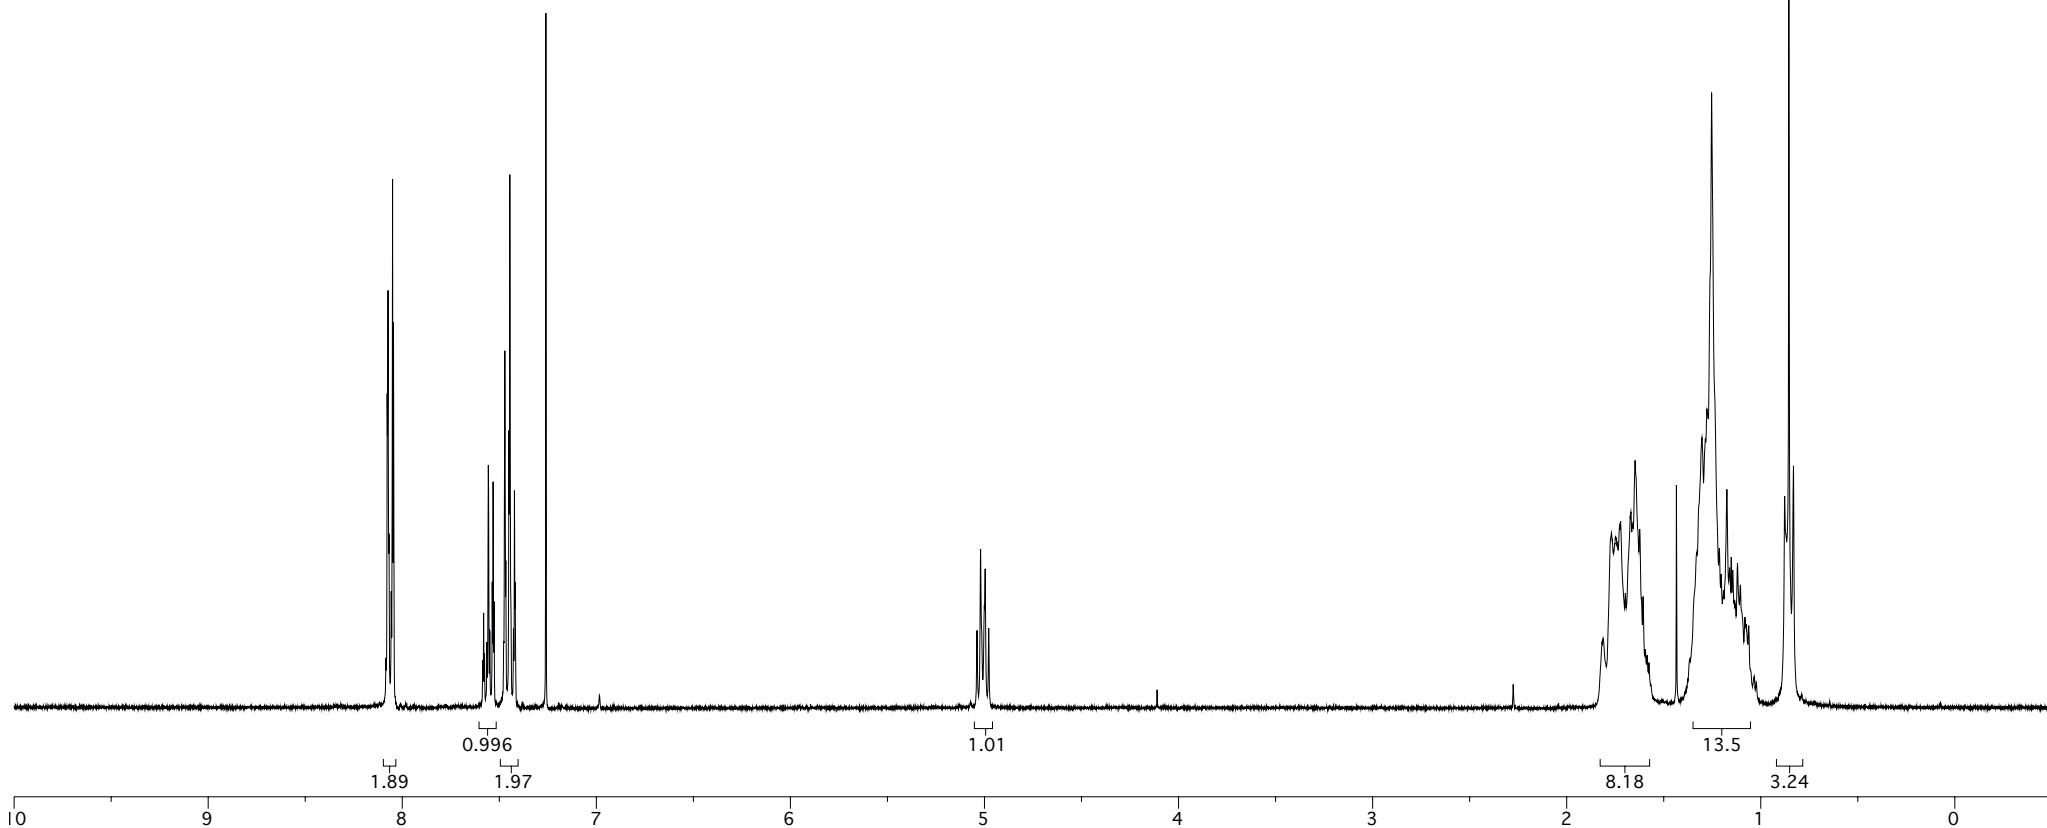

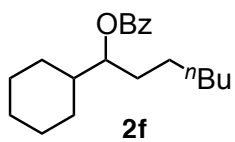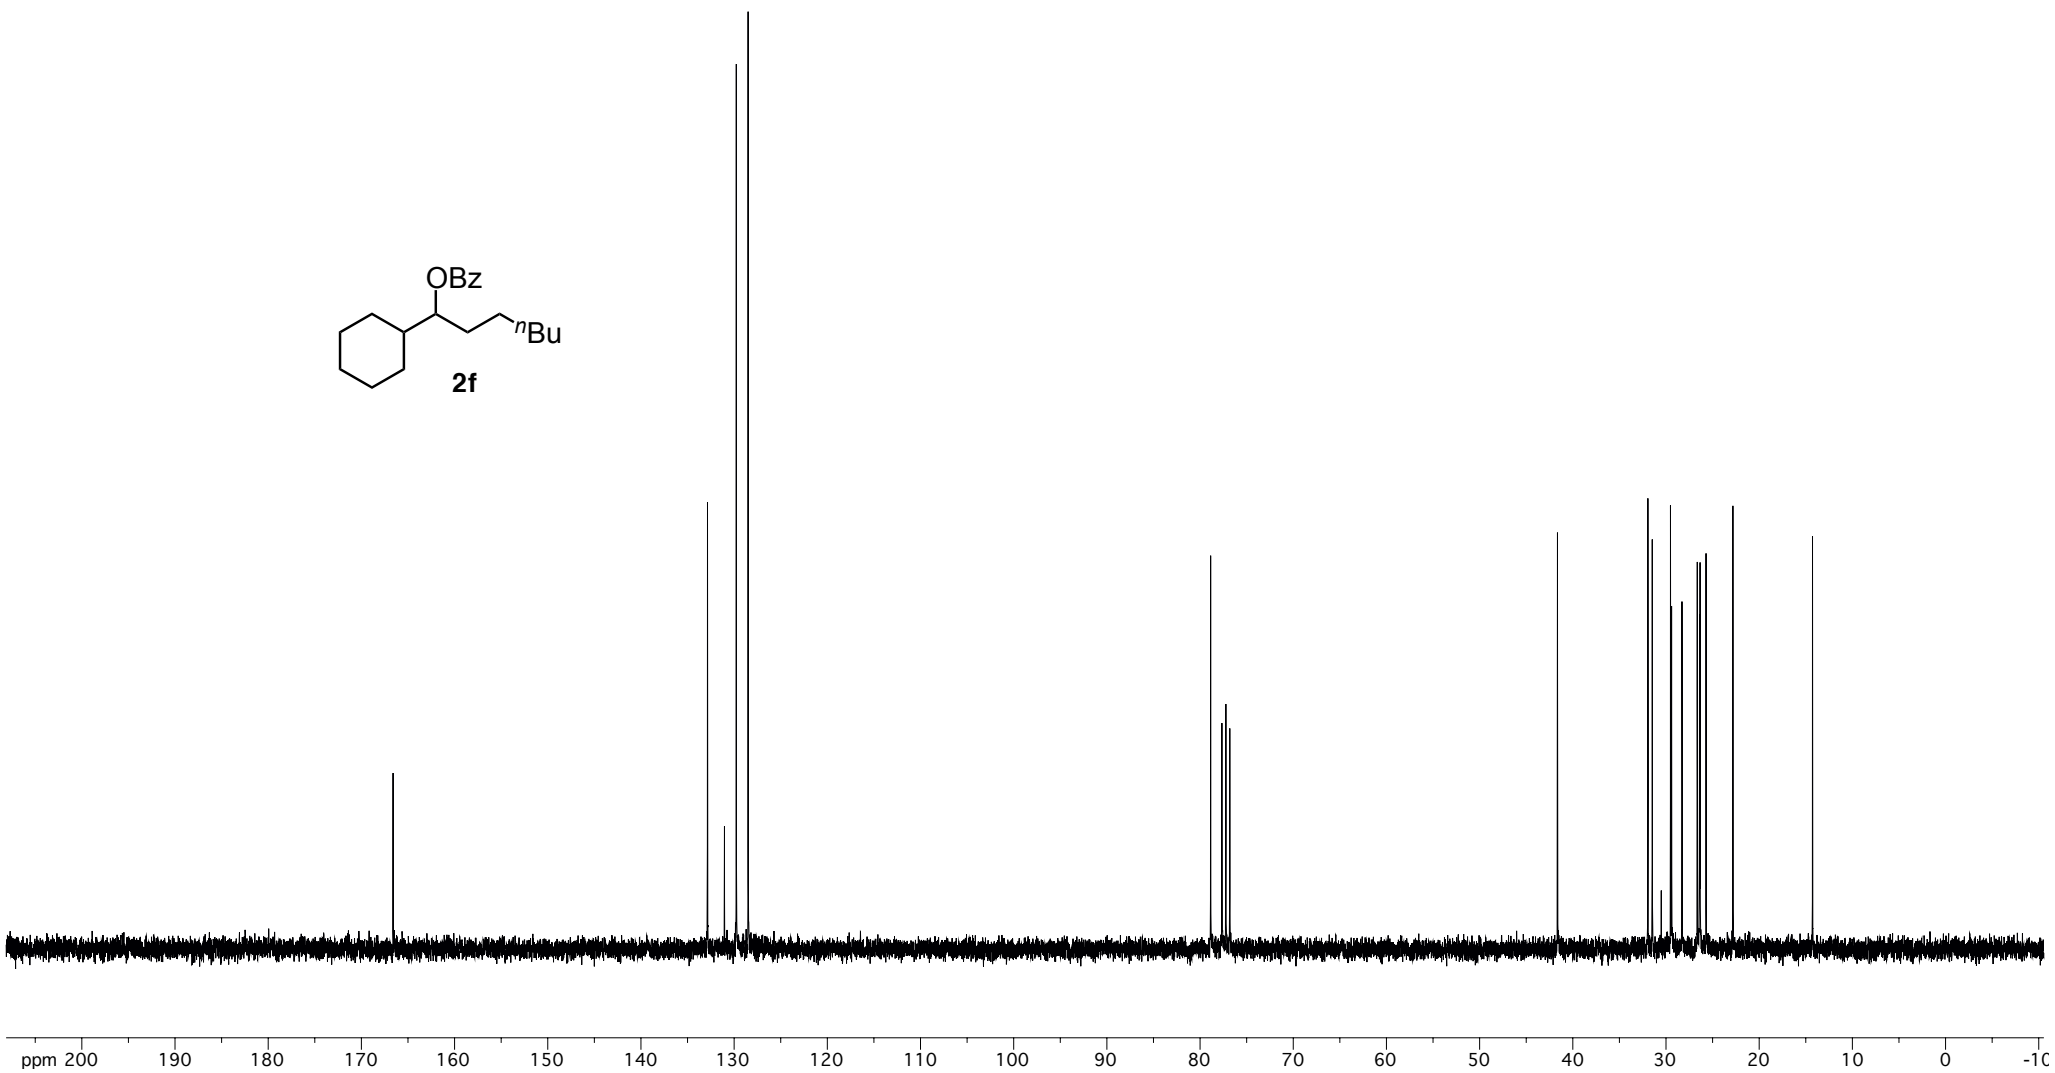

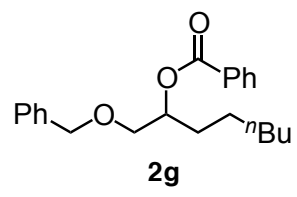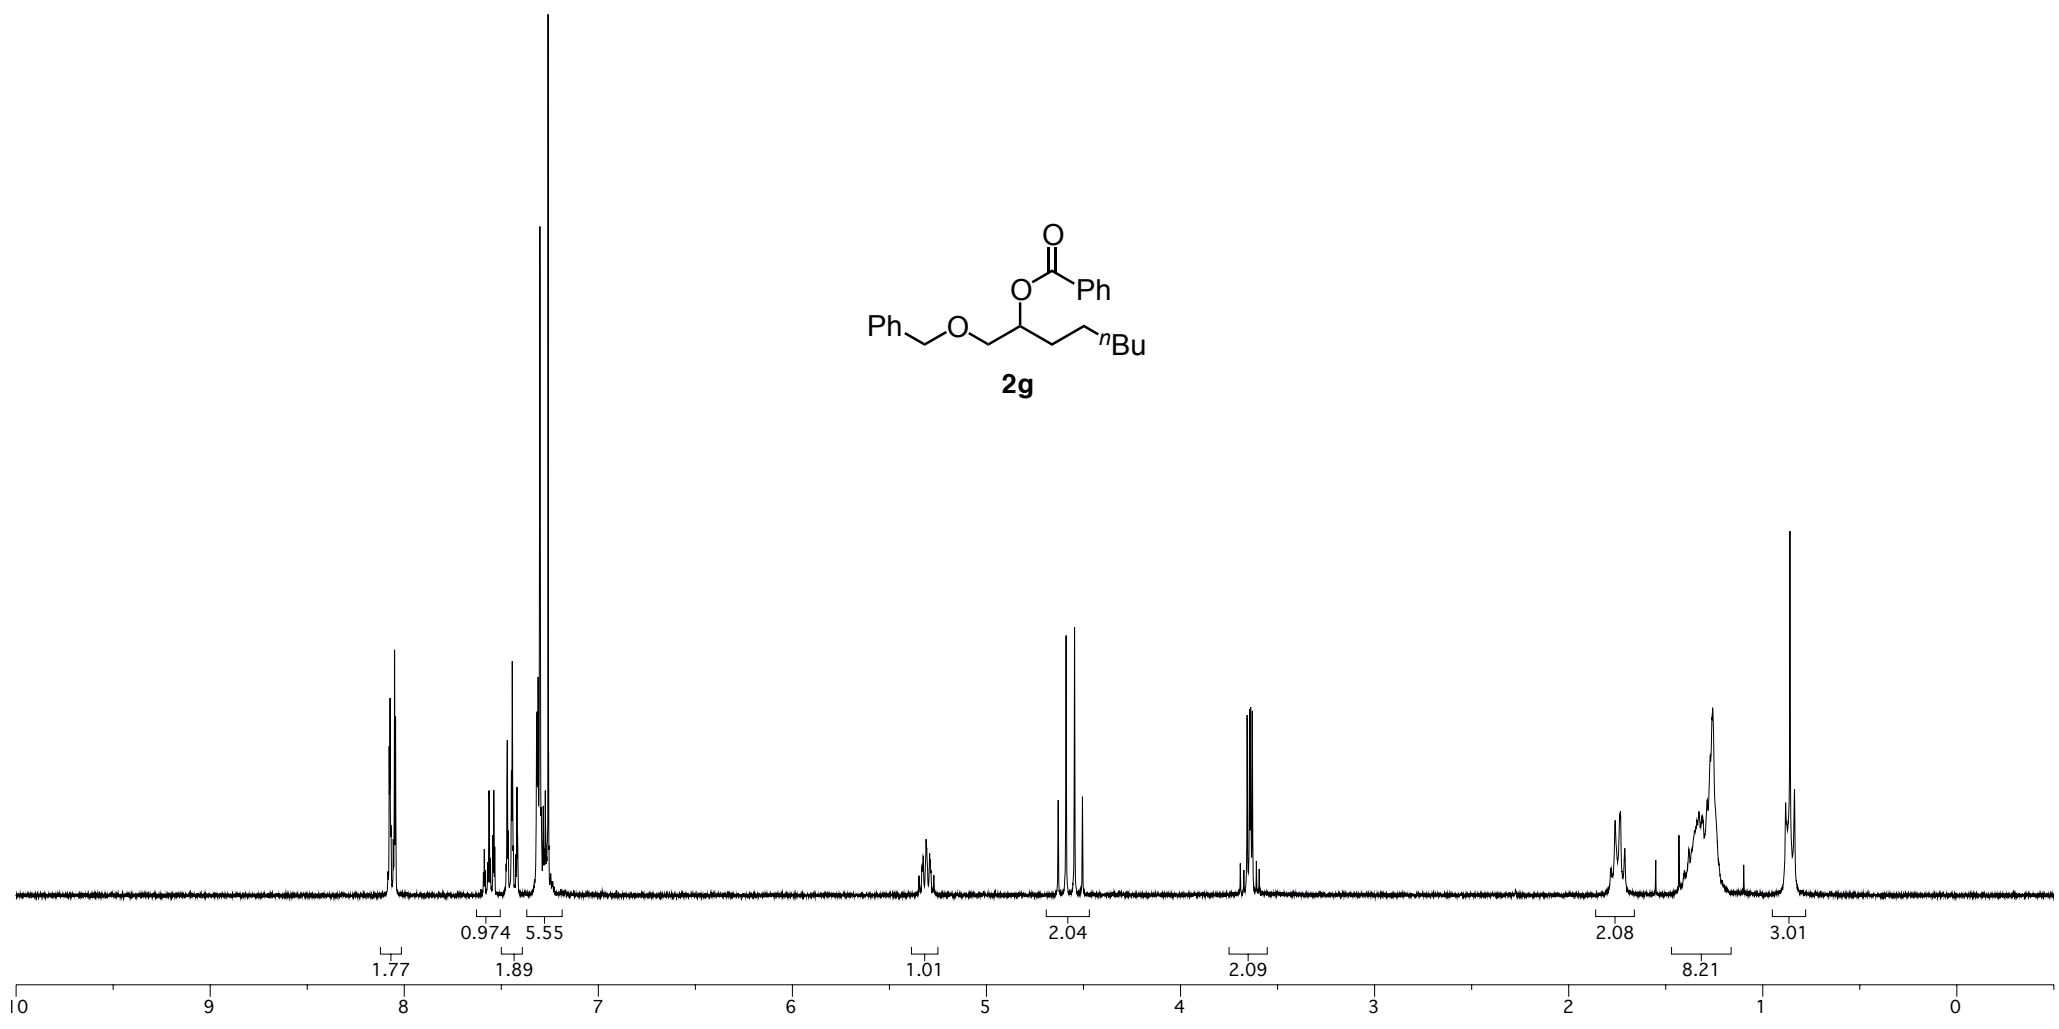



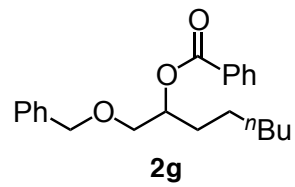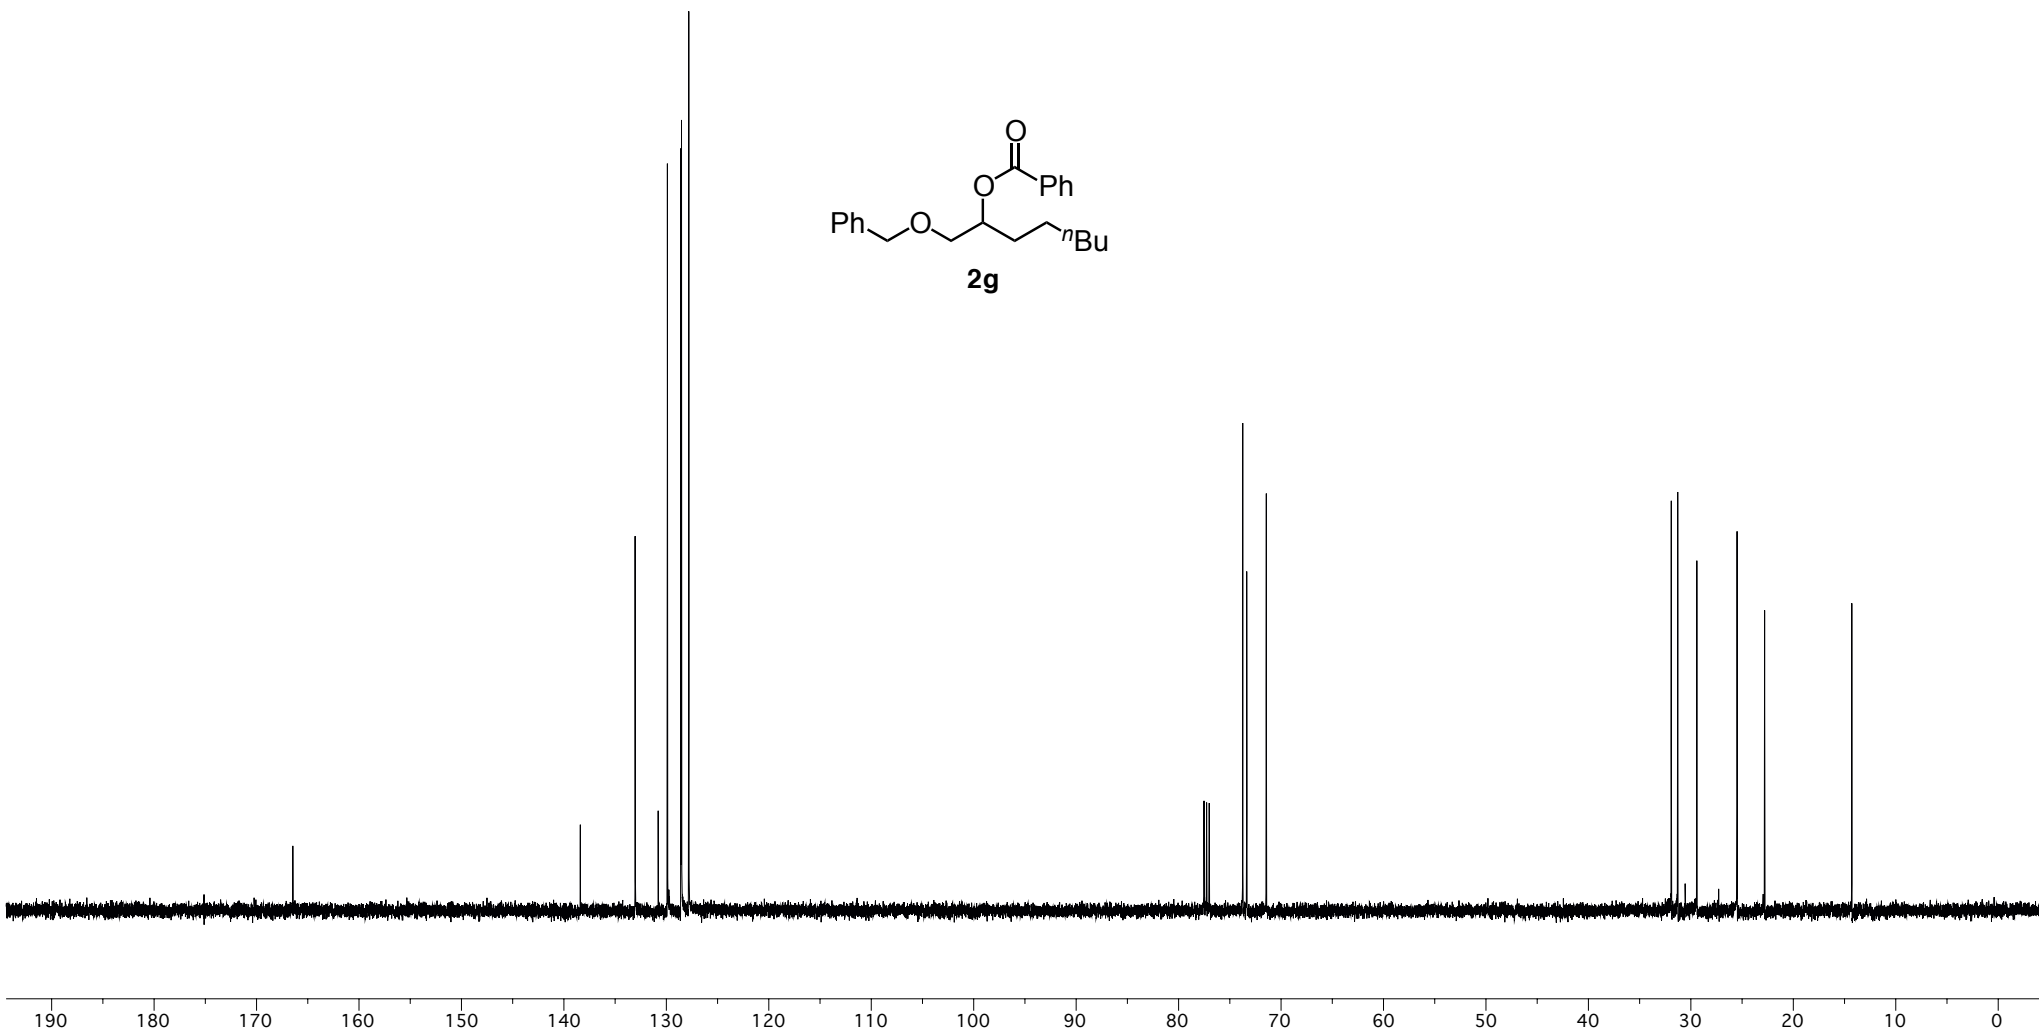

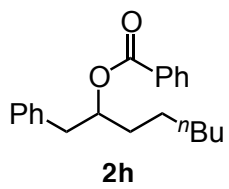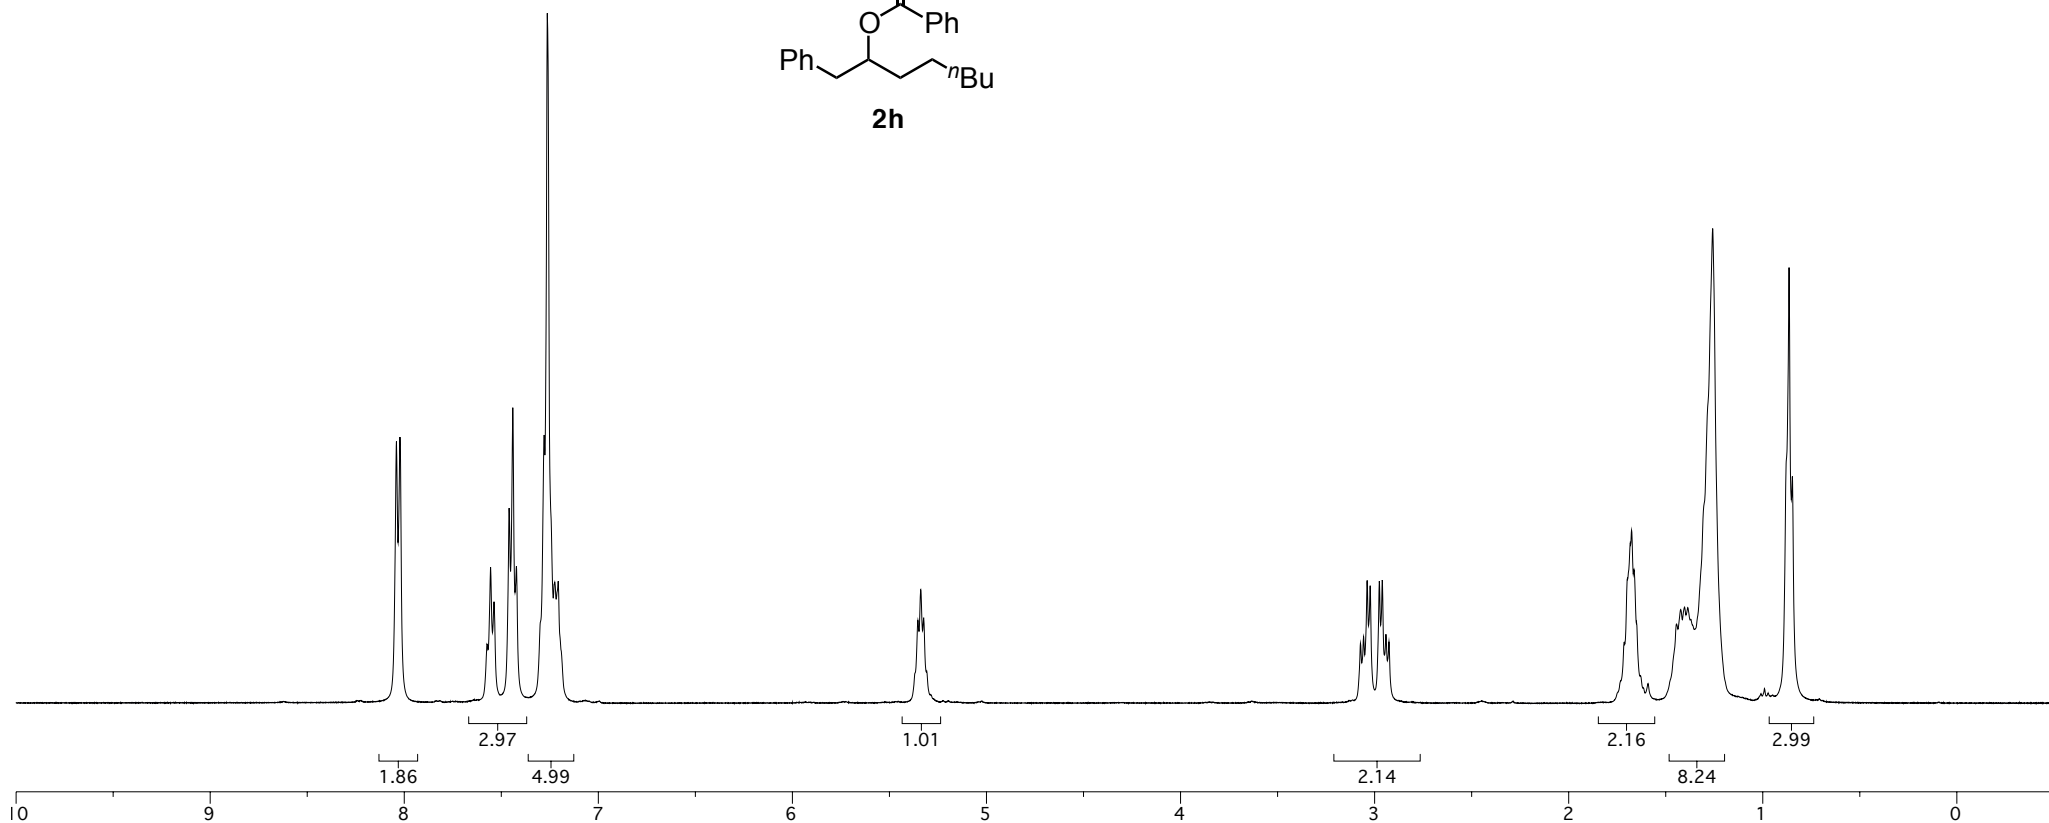

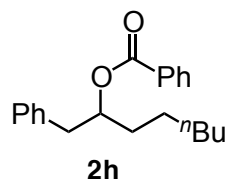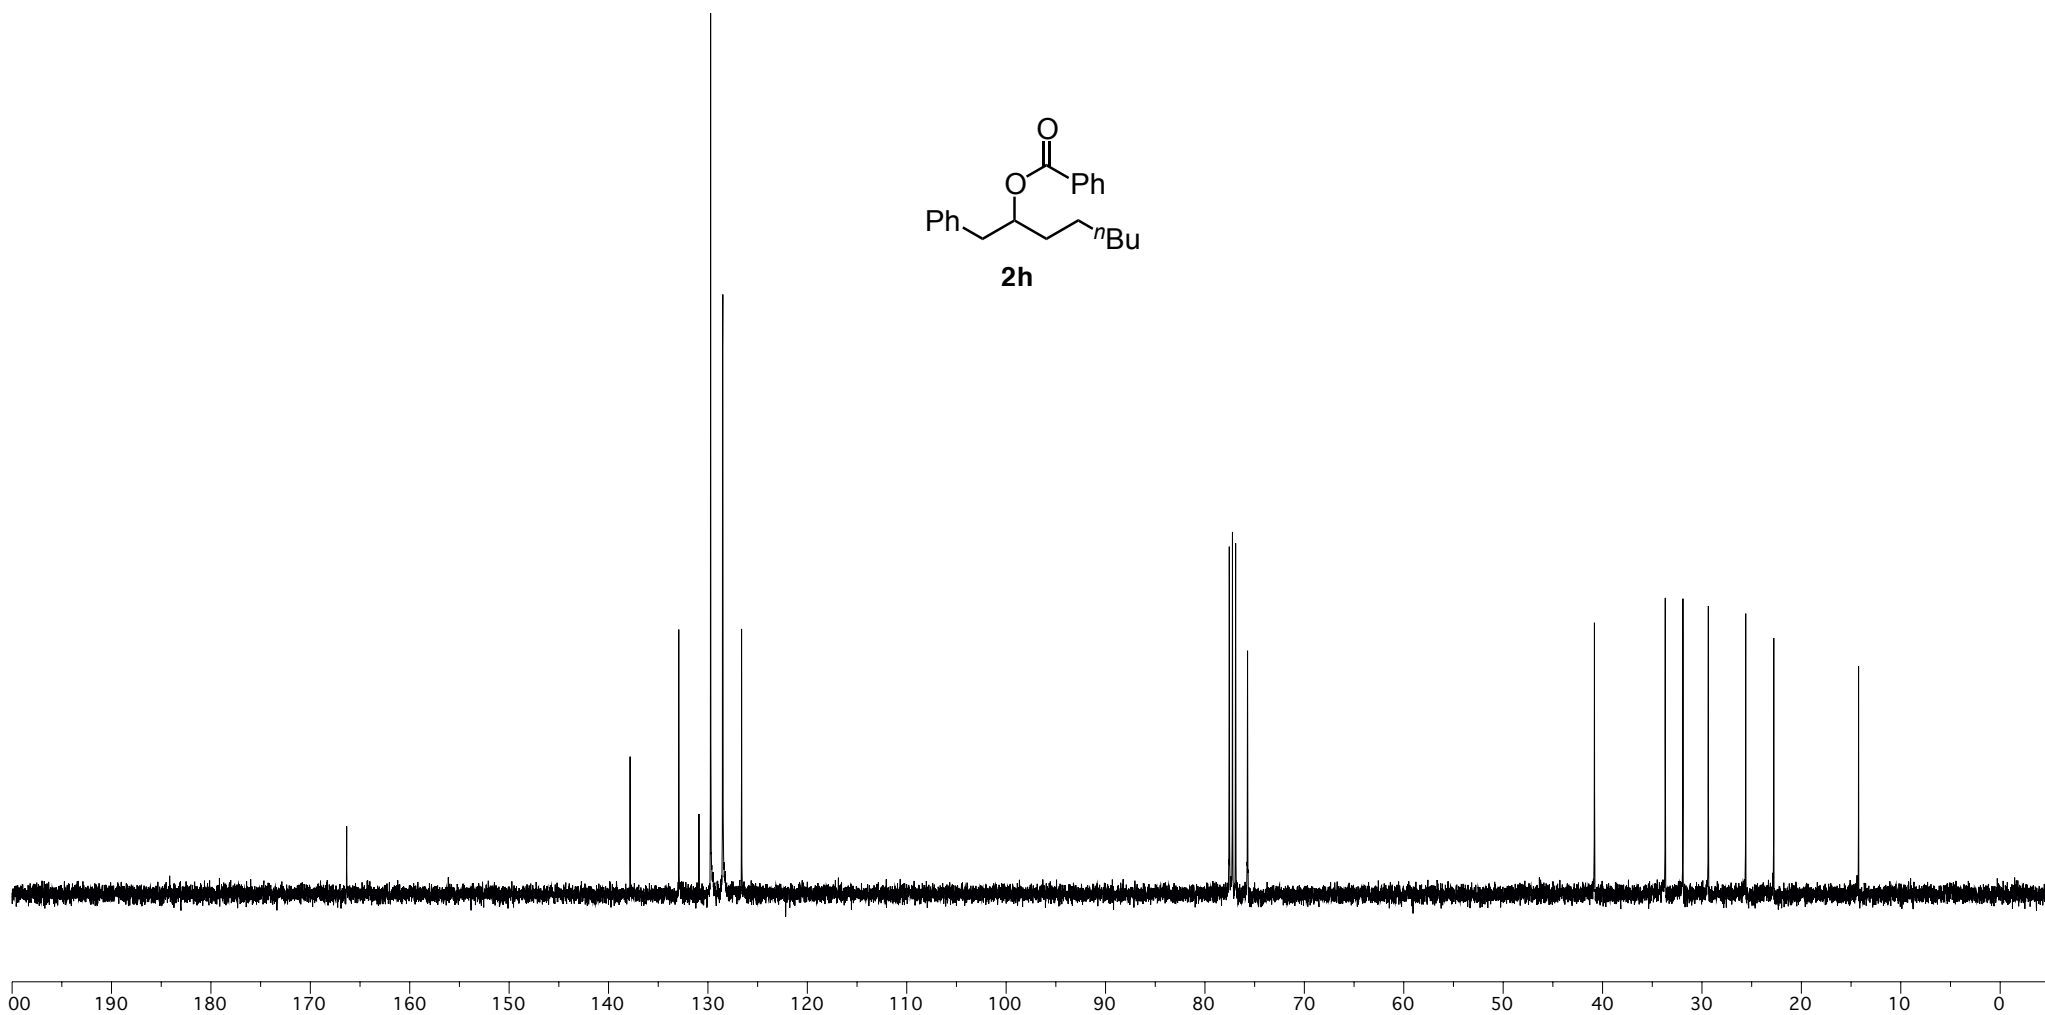

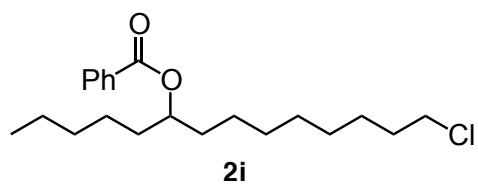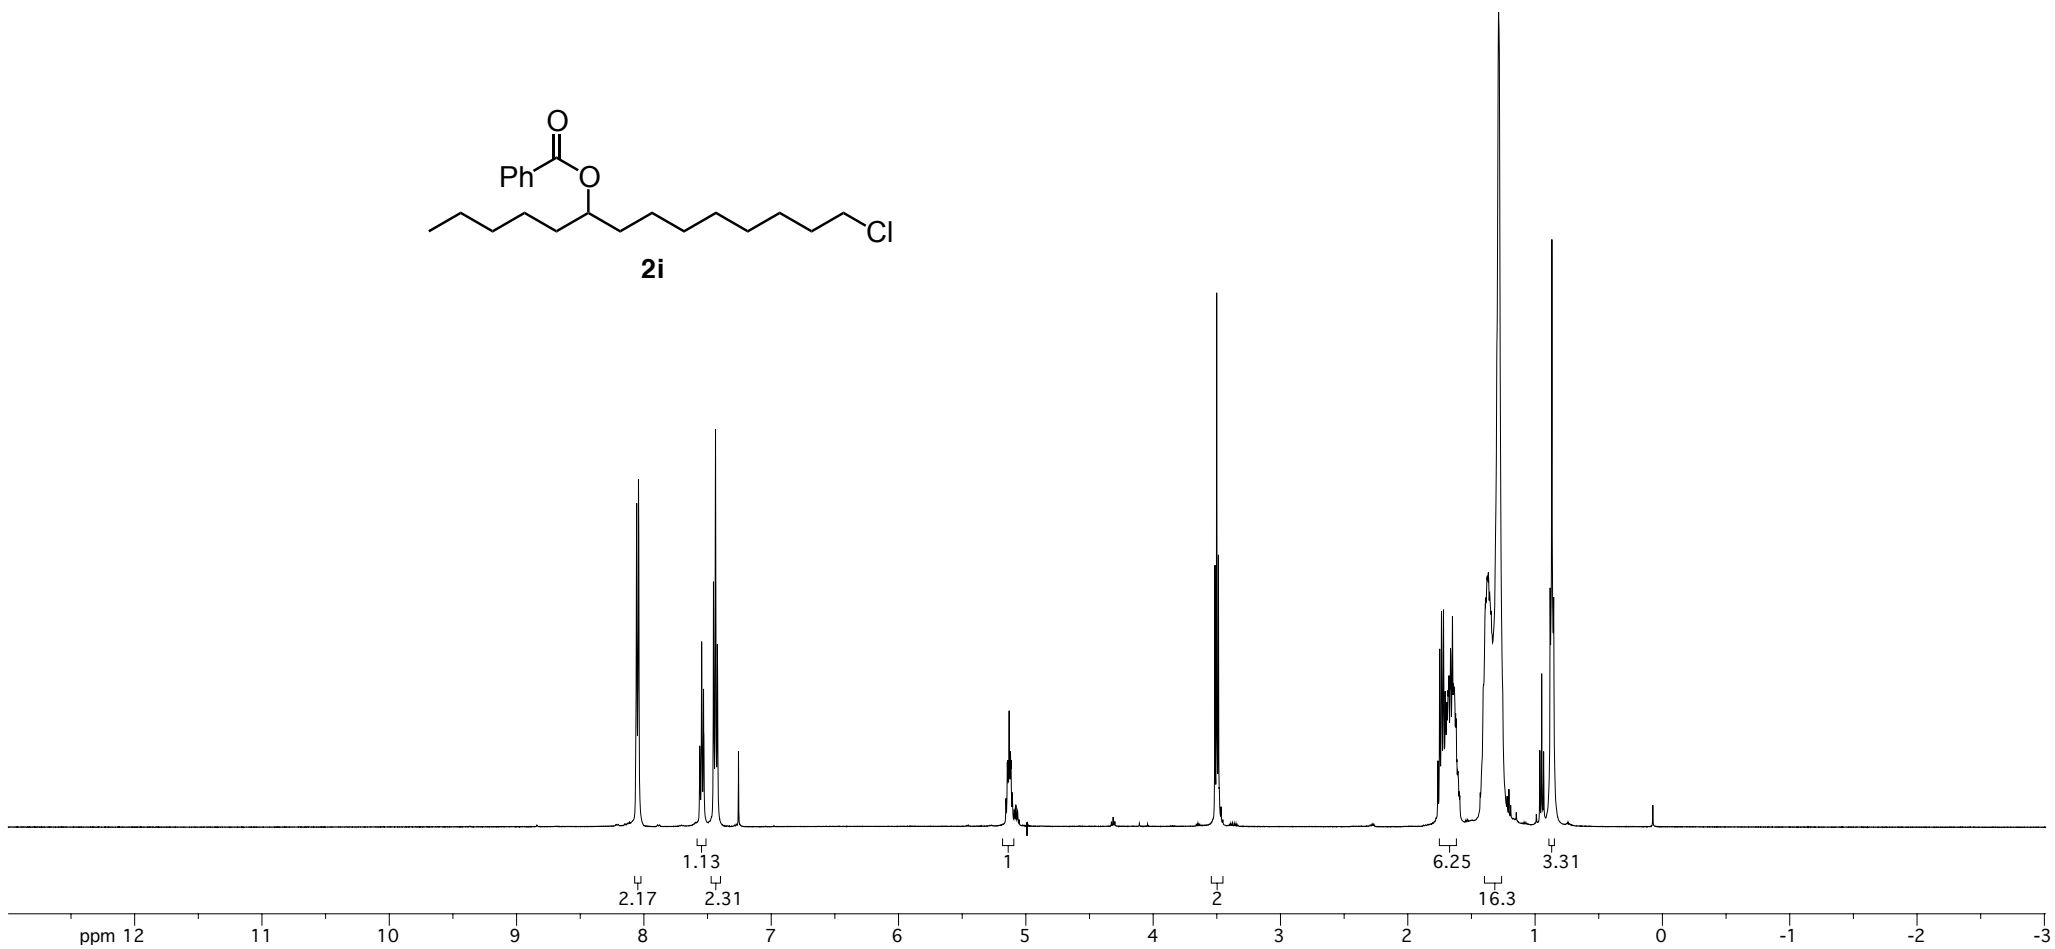

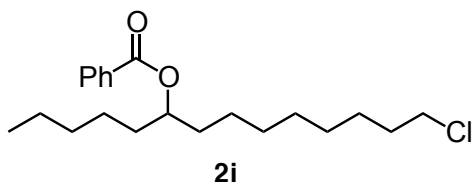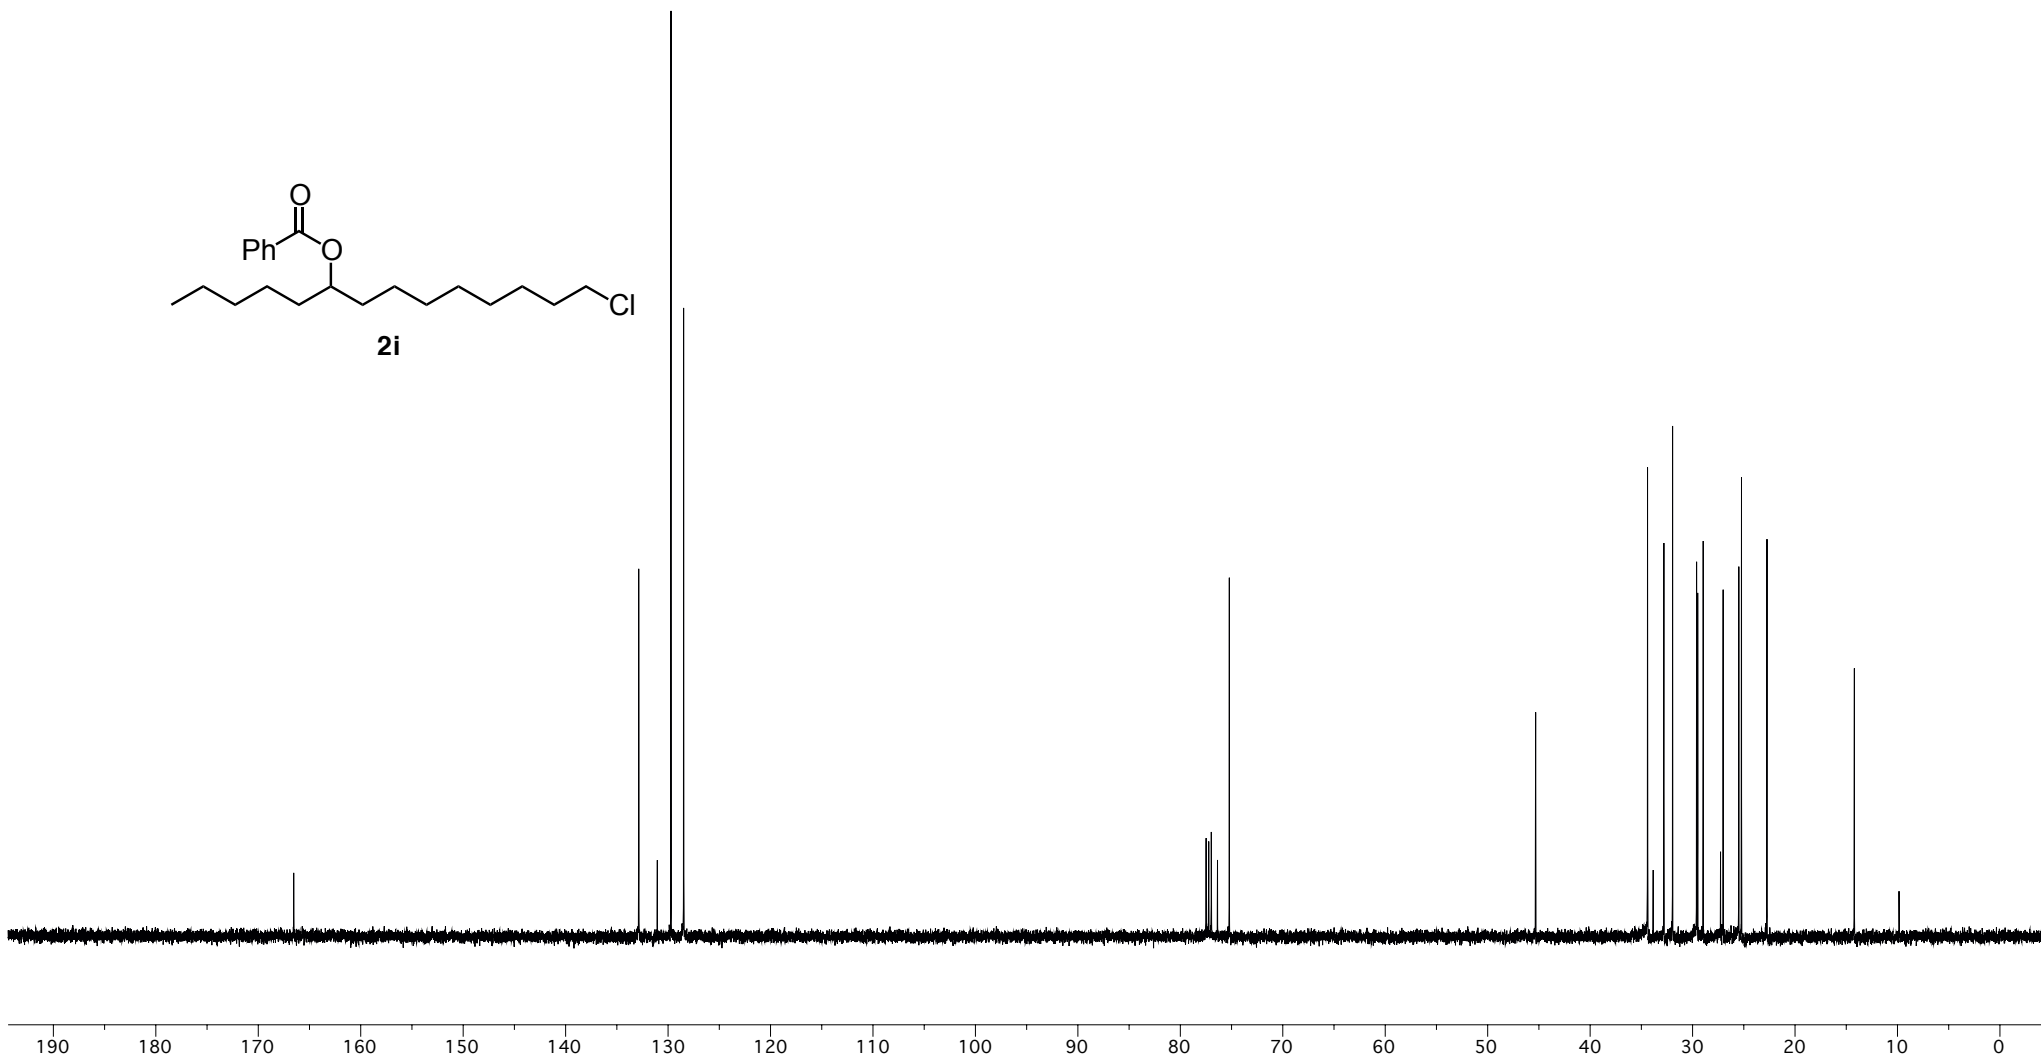

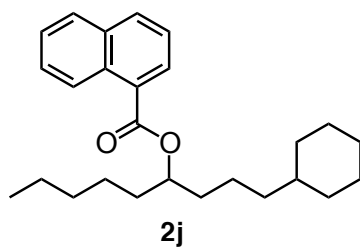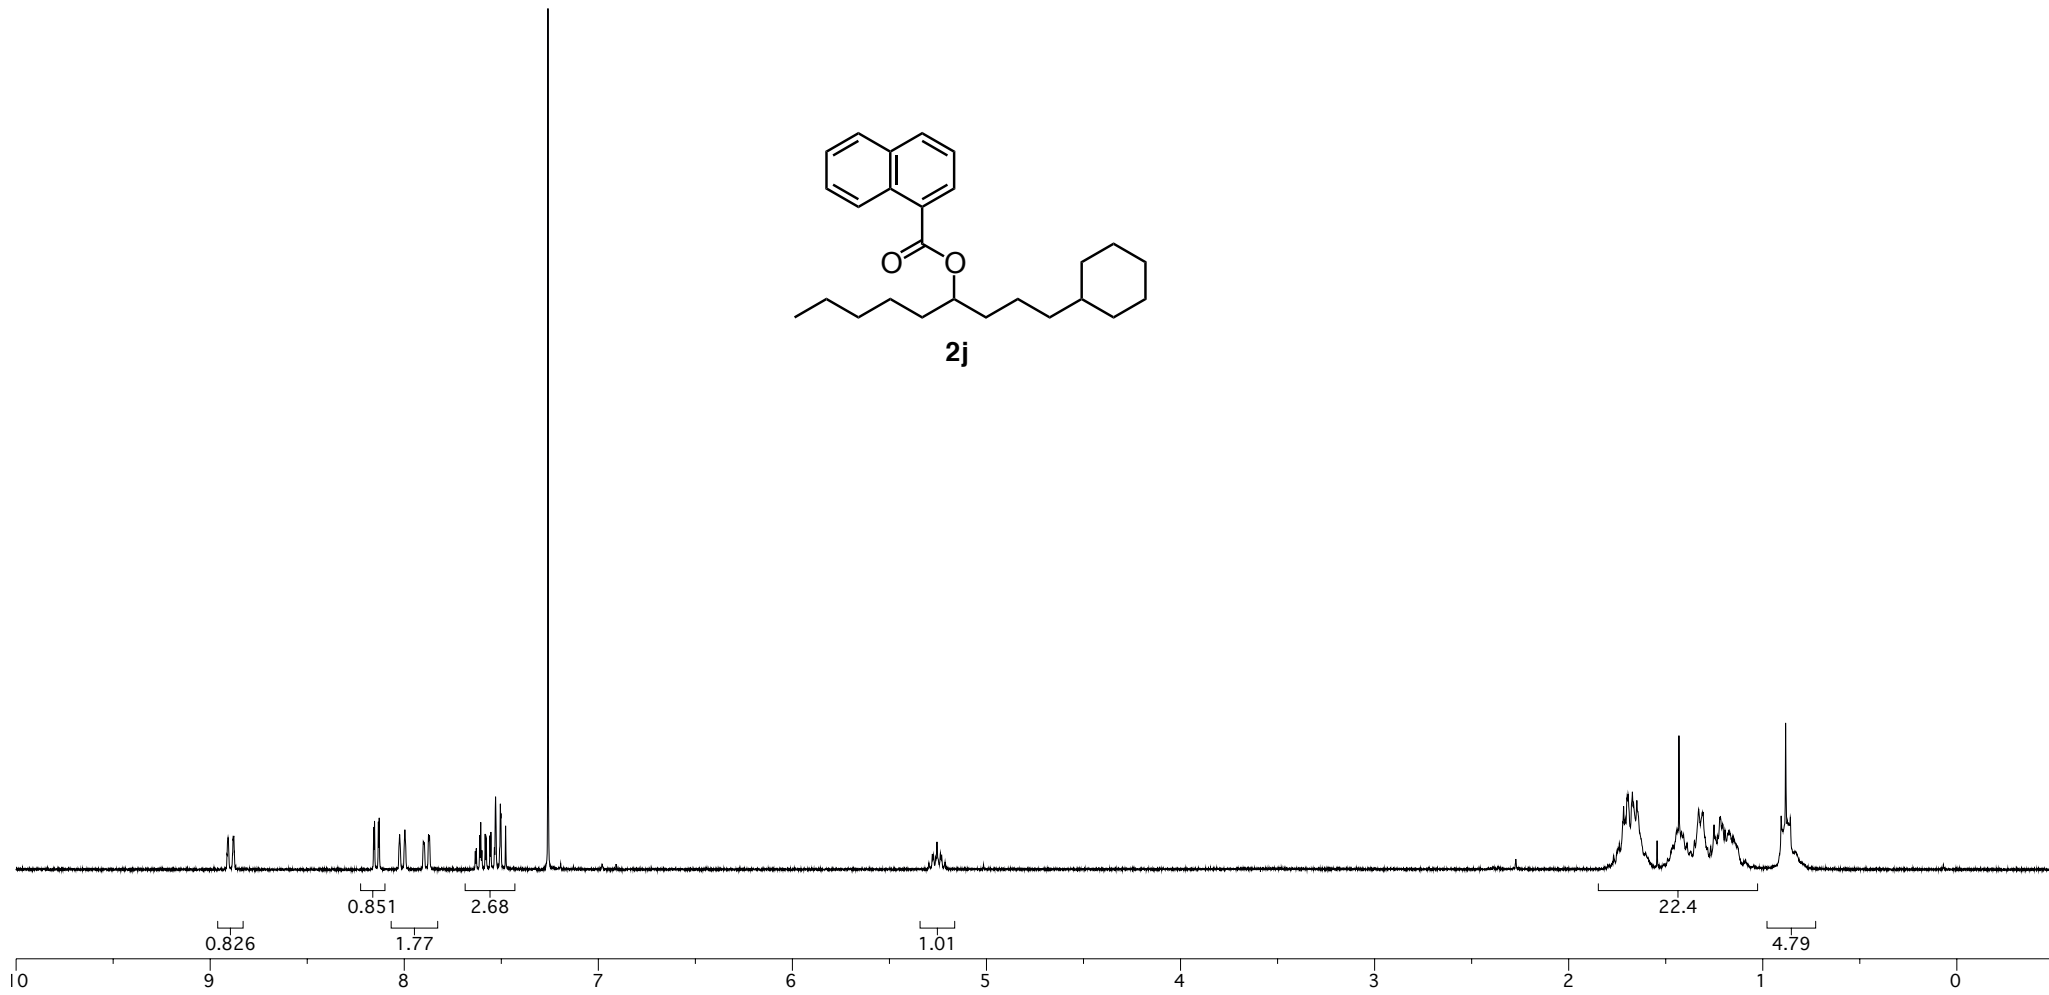

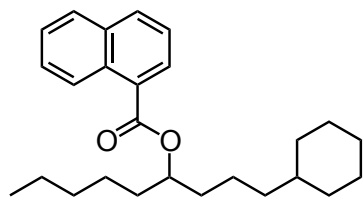

2j

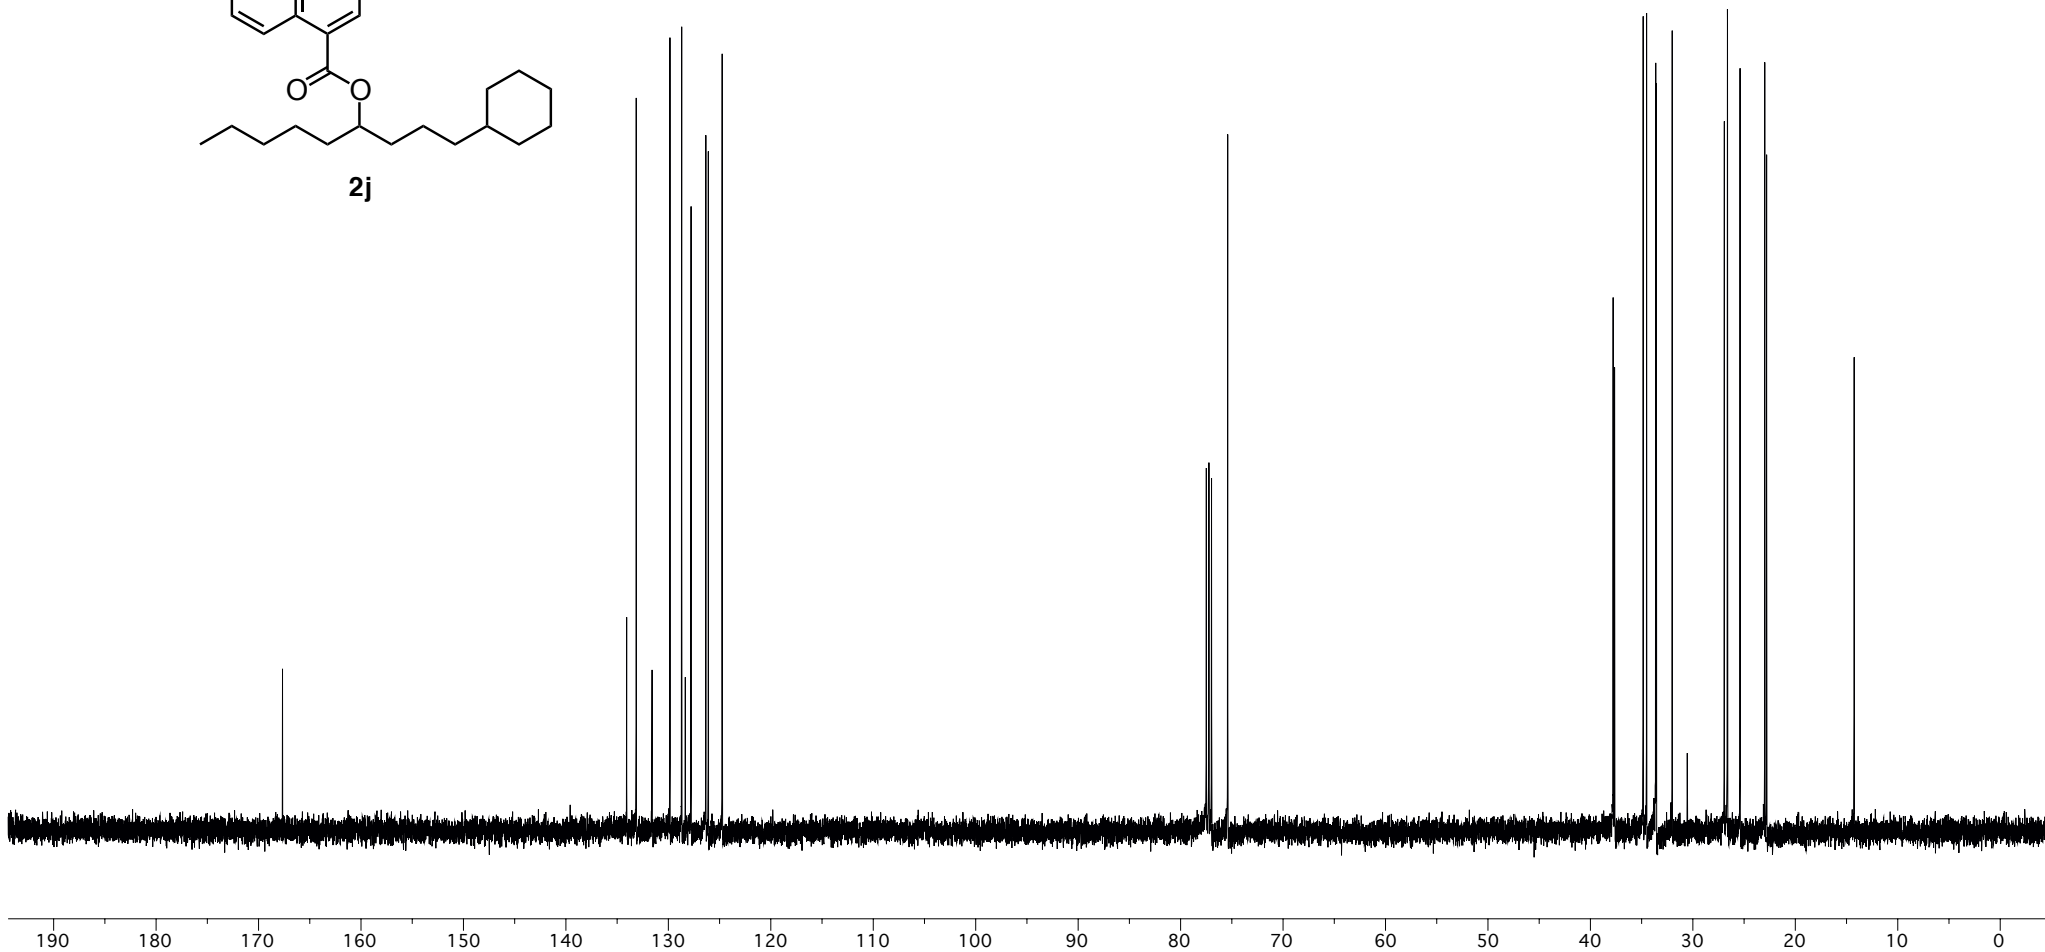

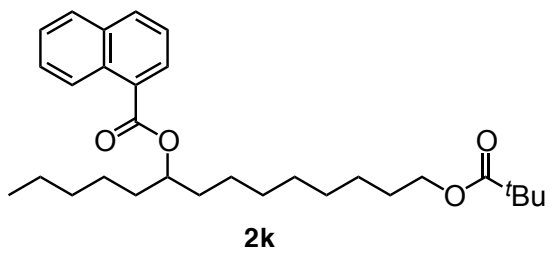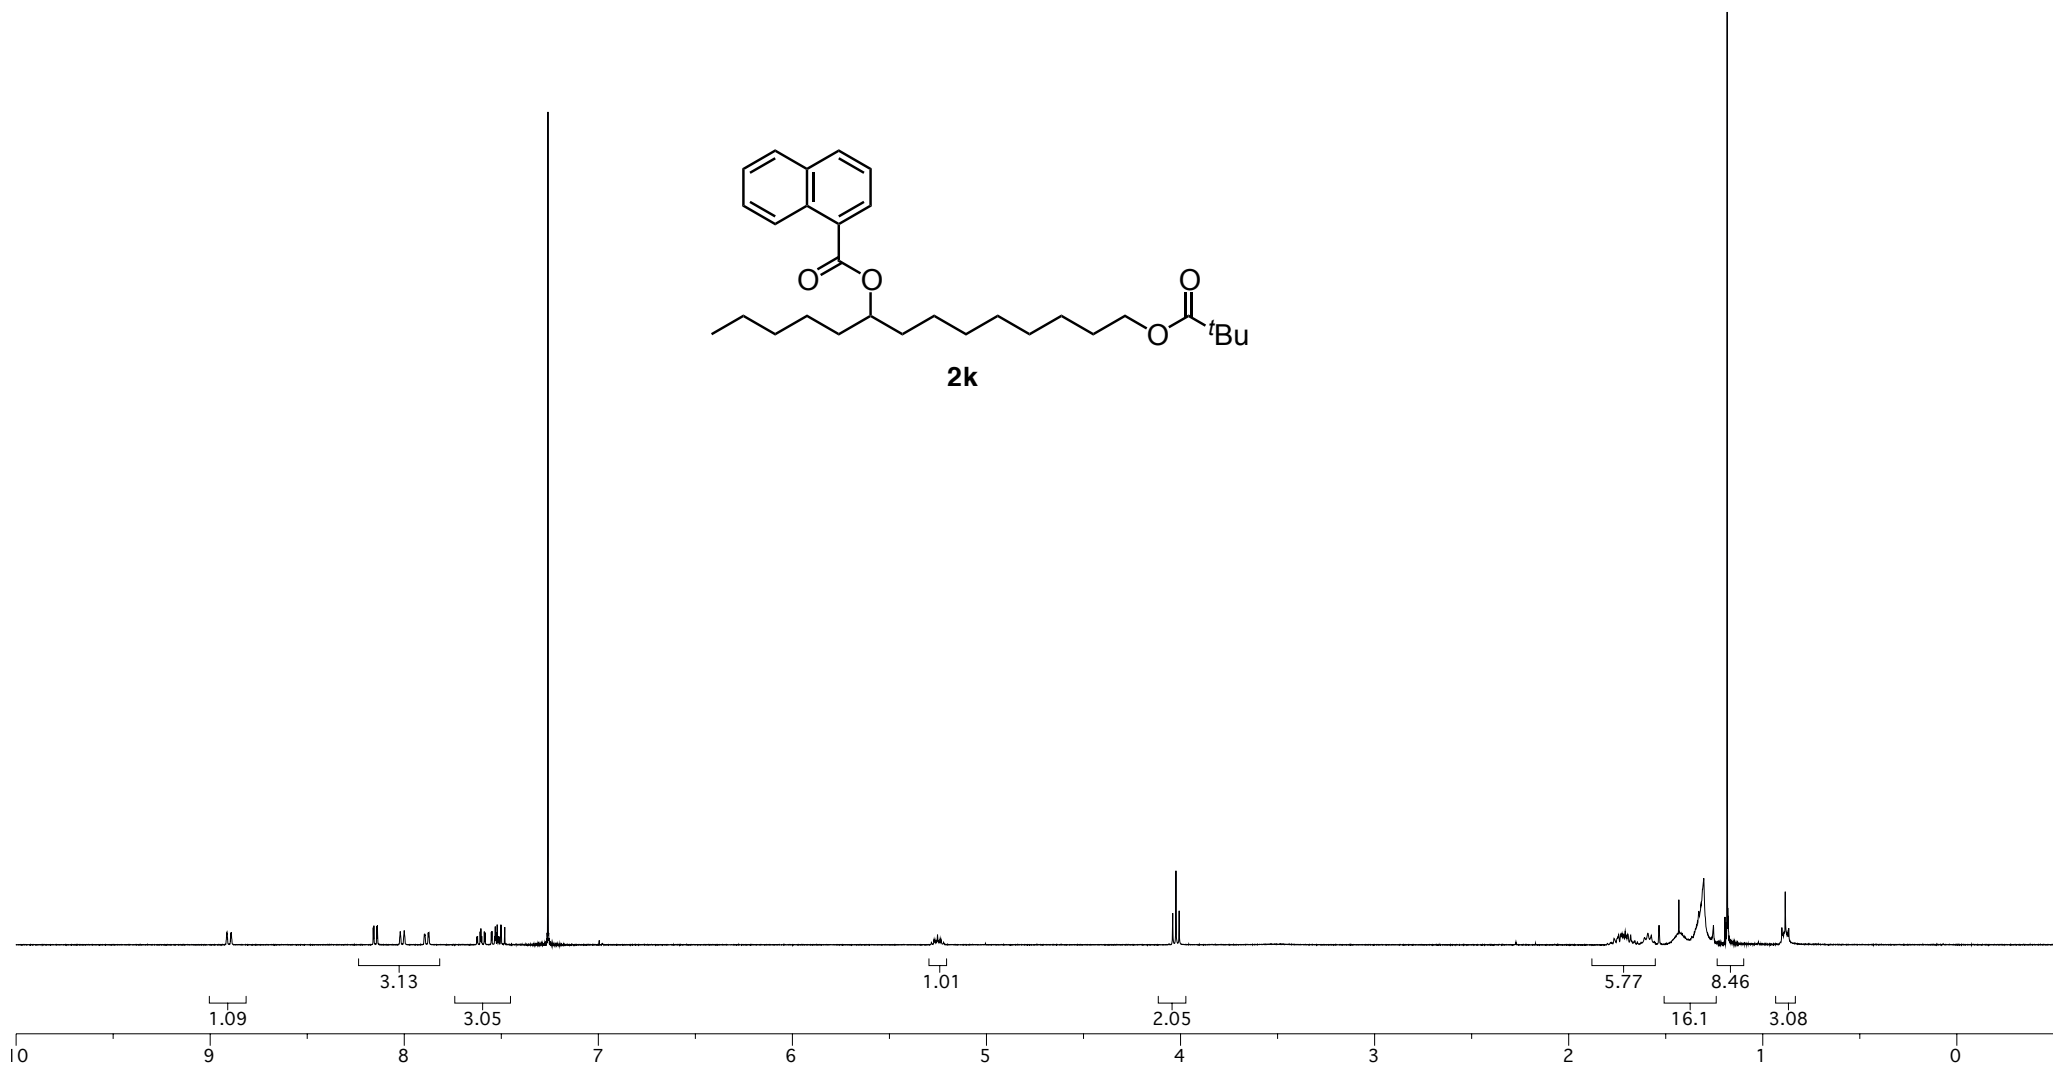



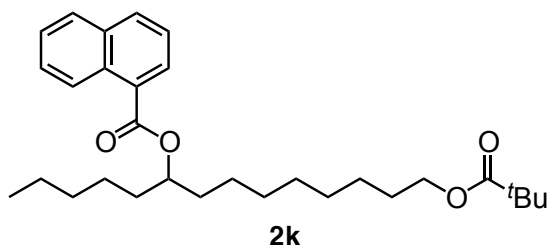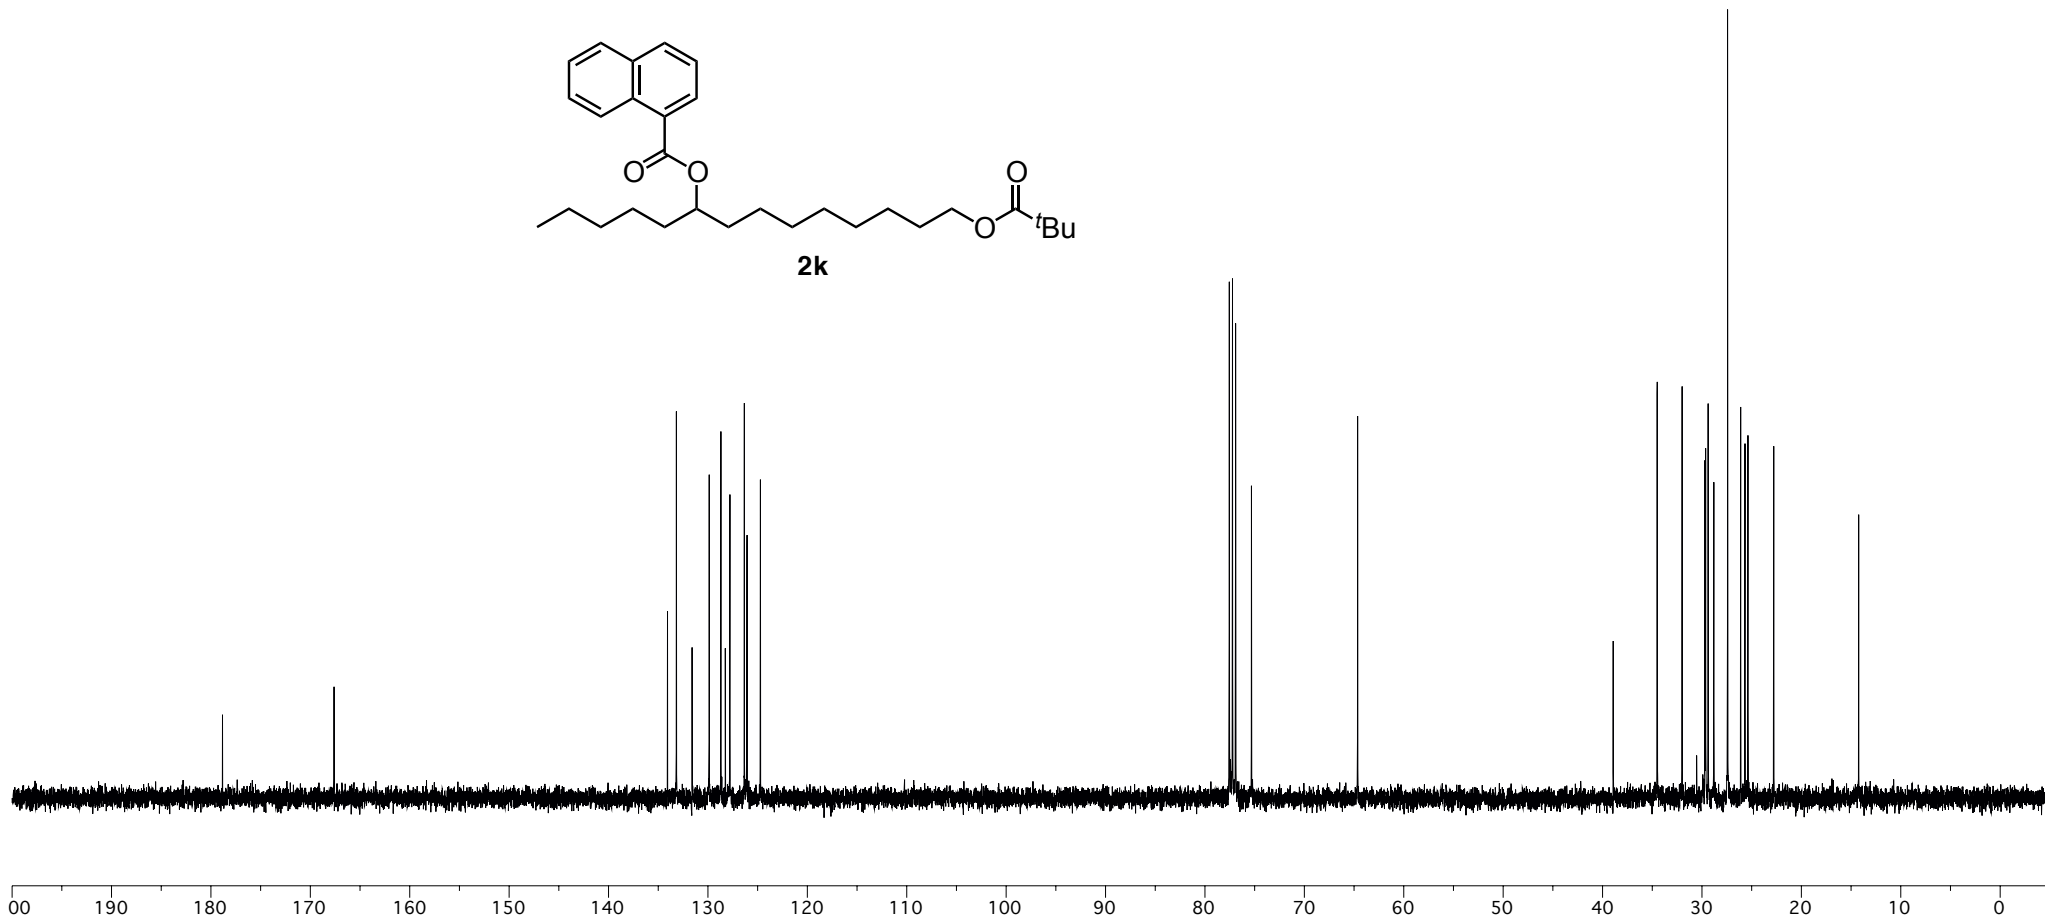

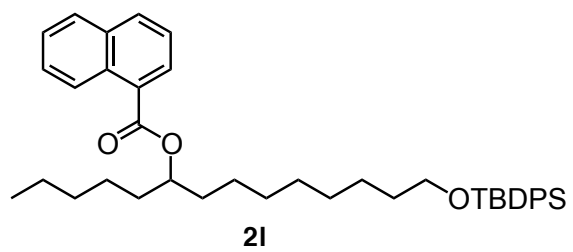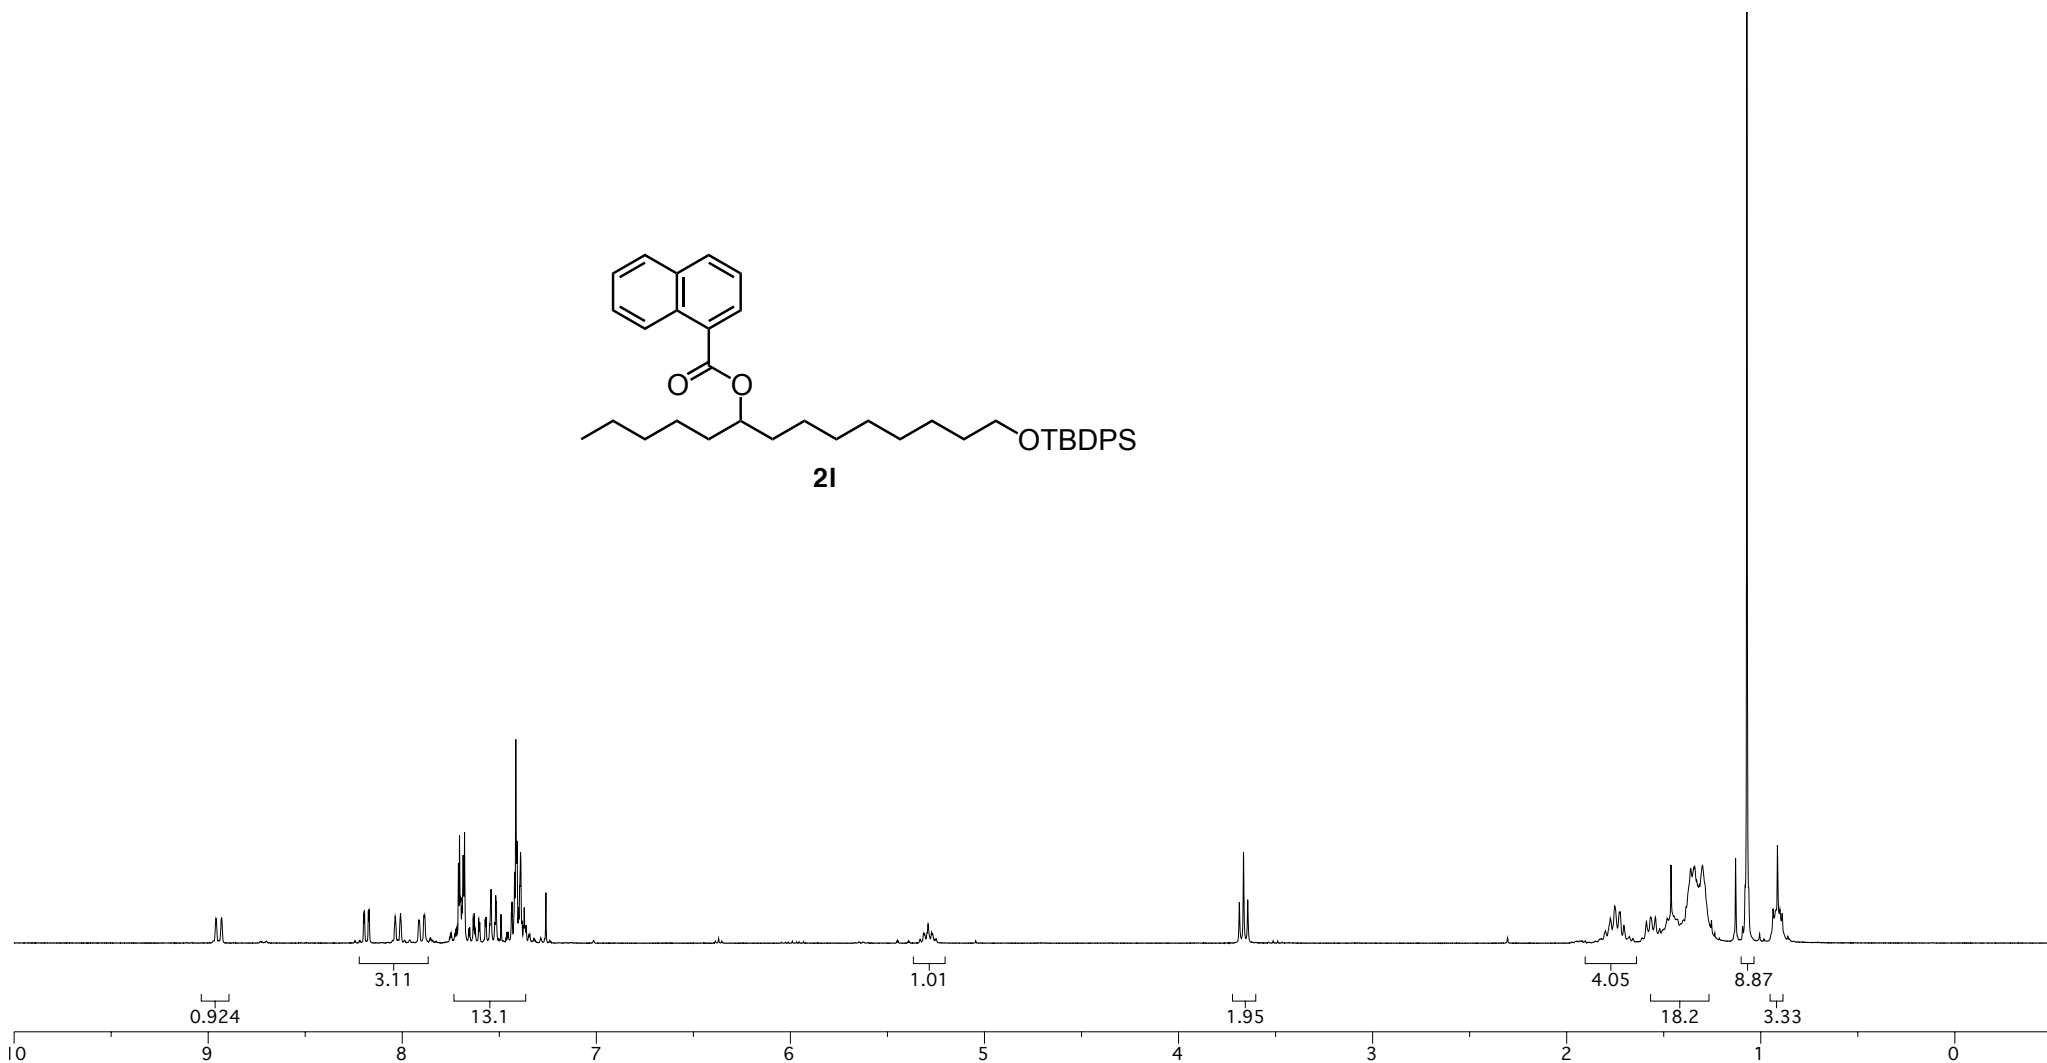

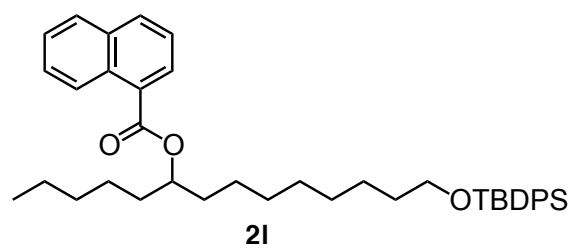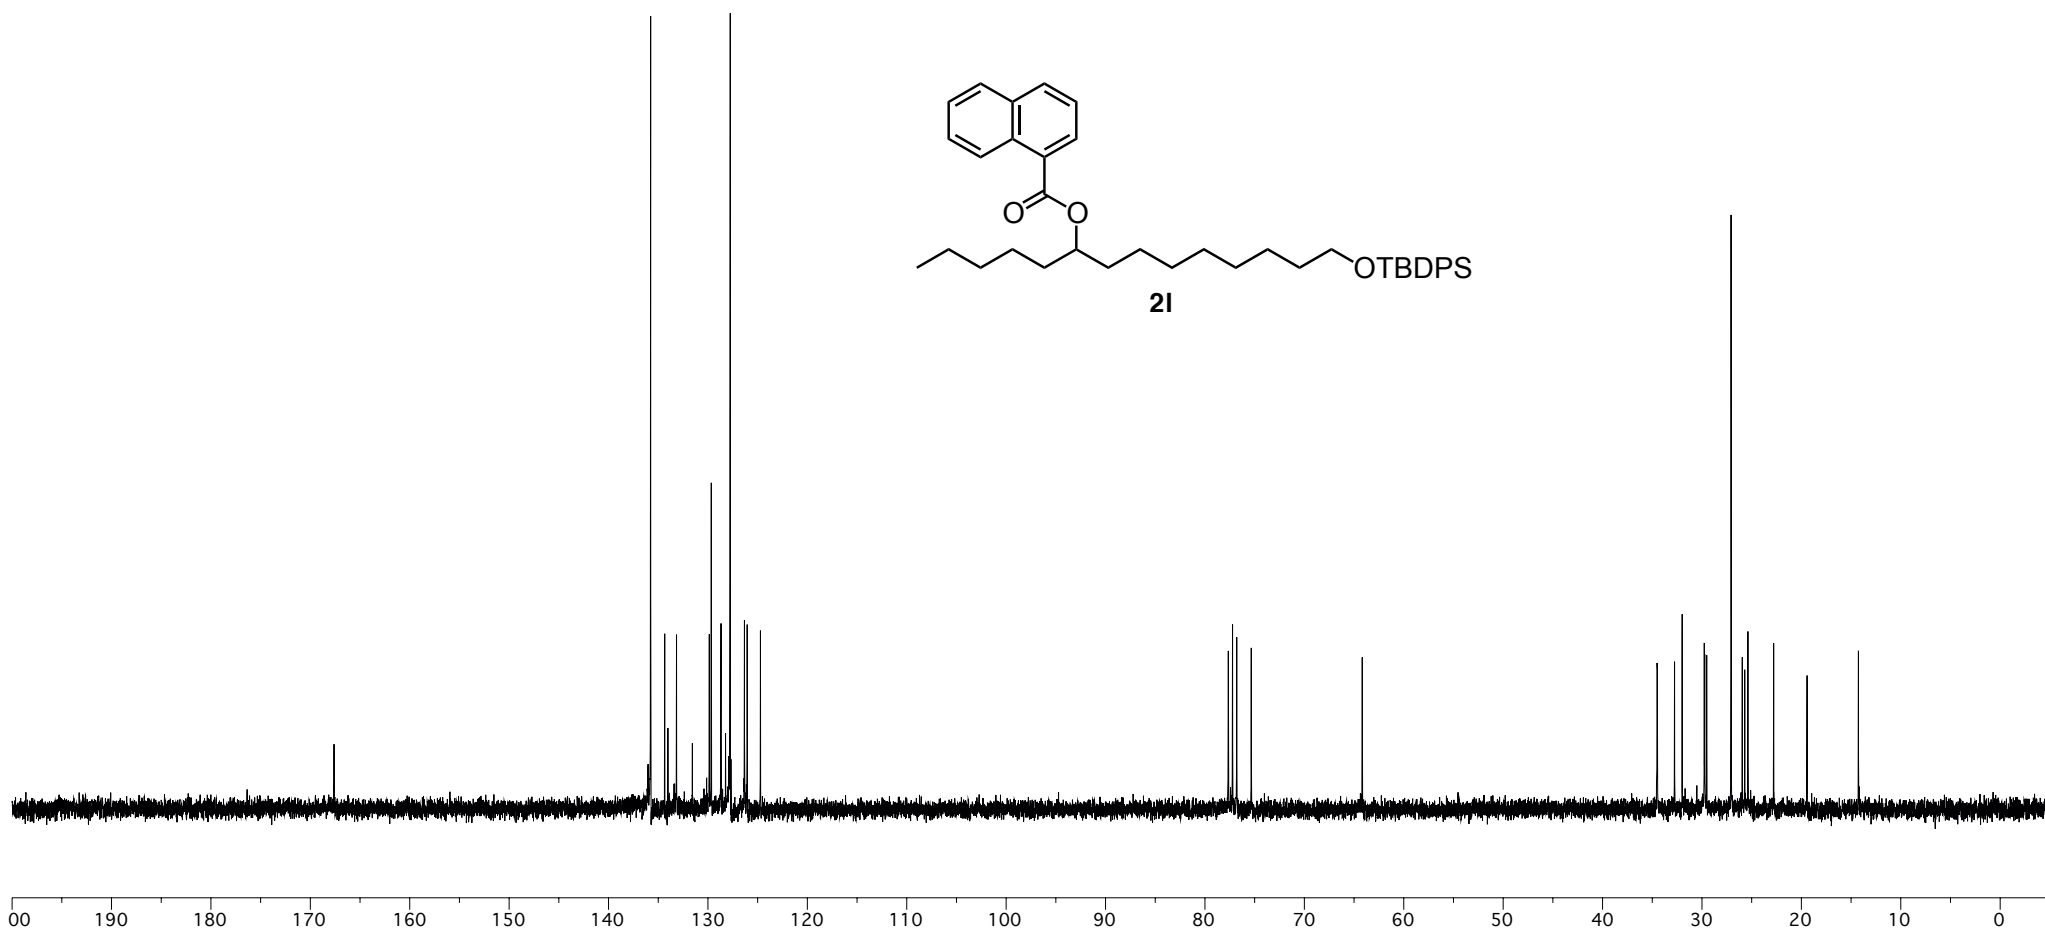

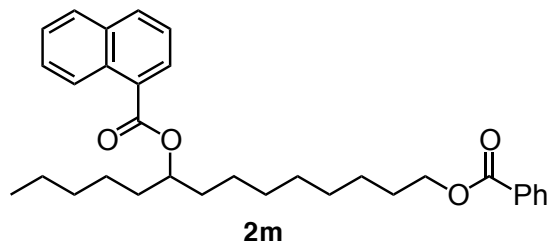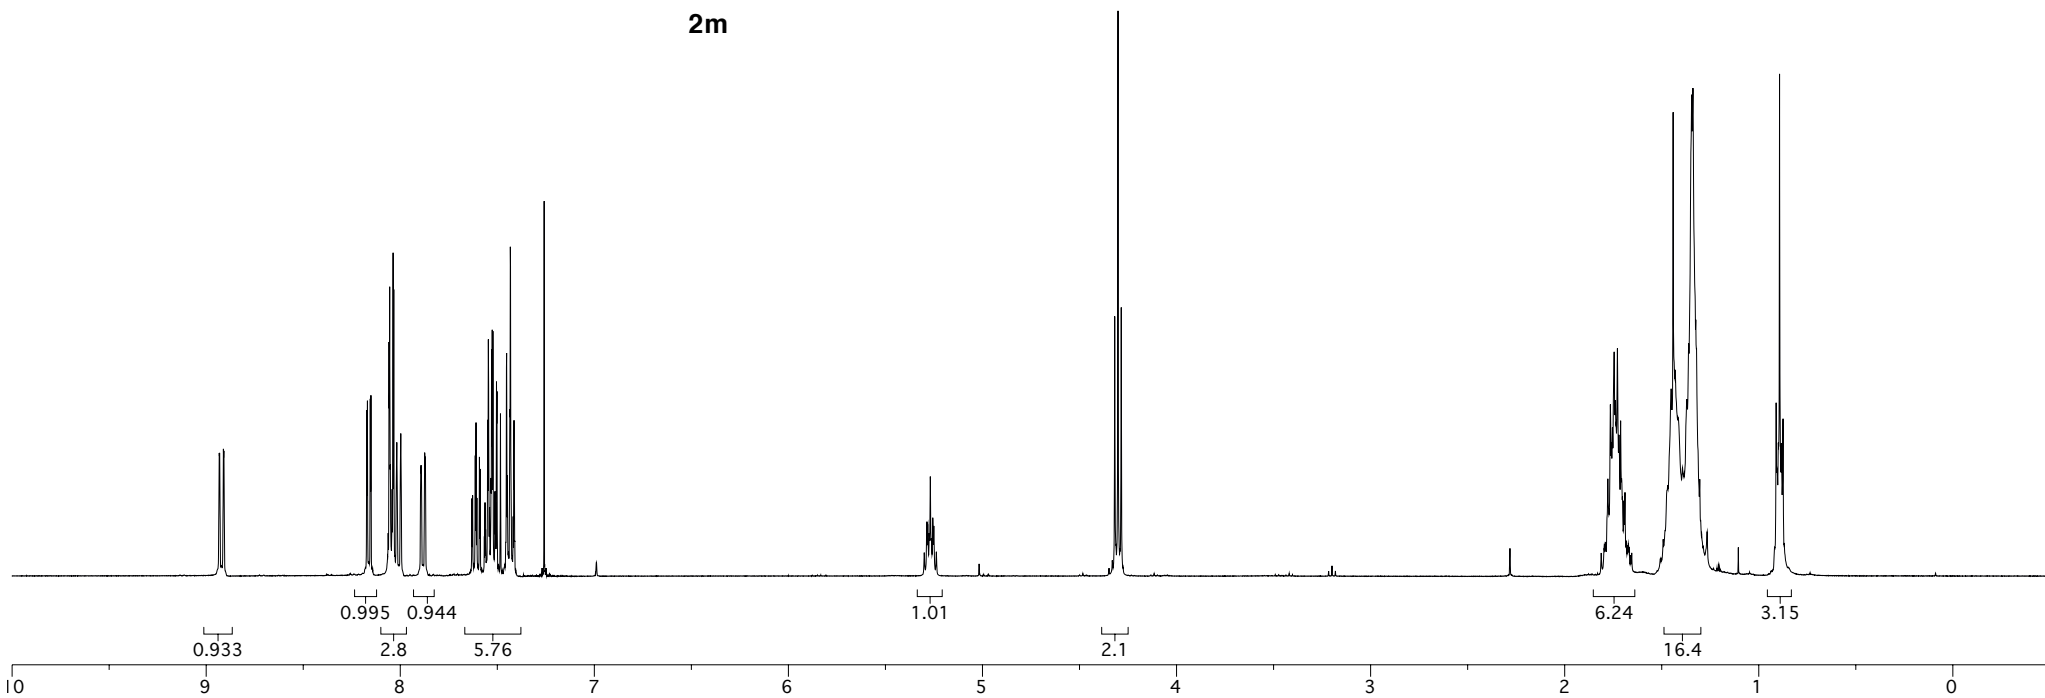

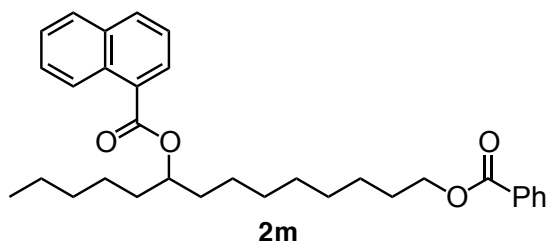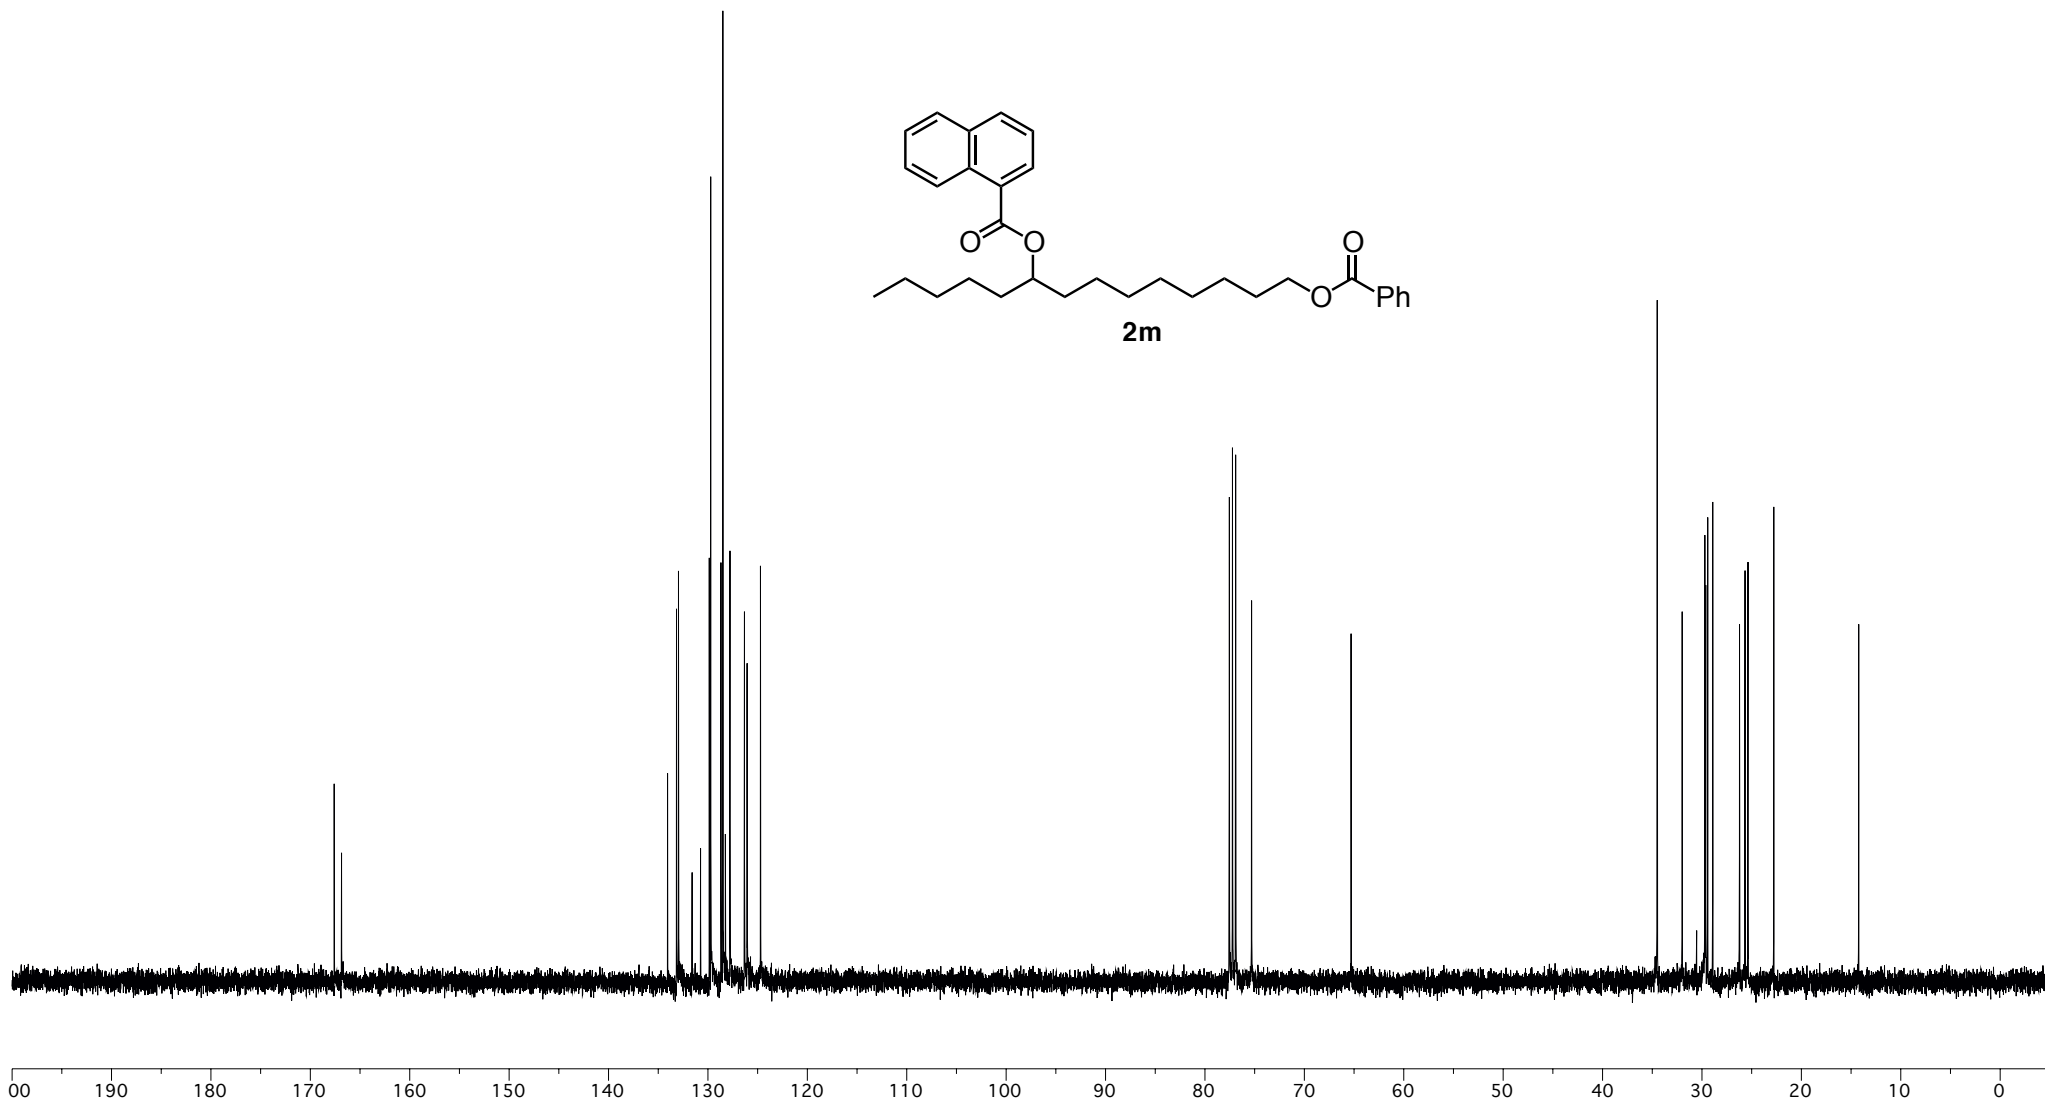

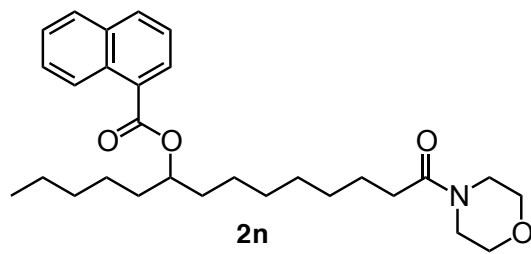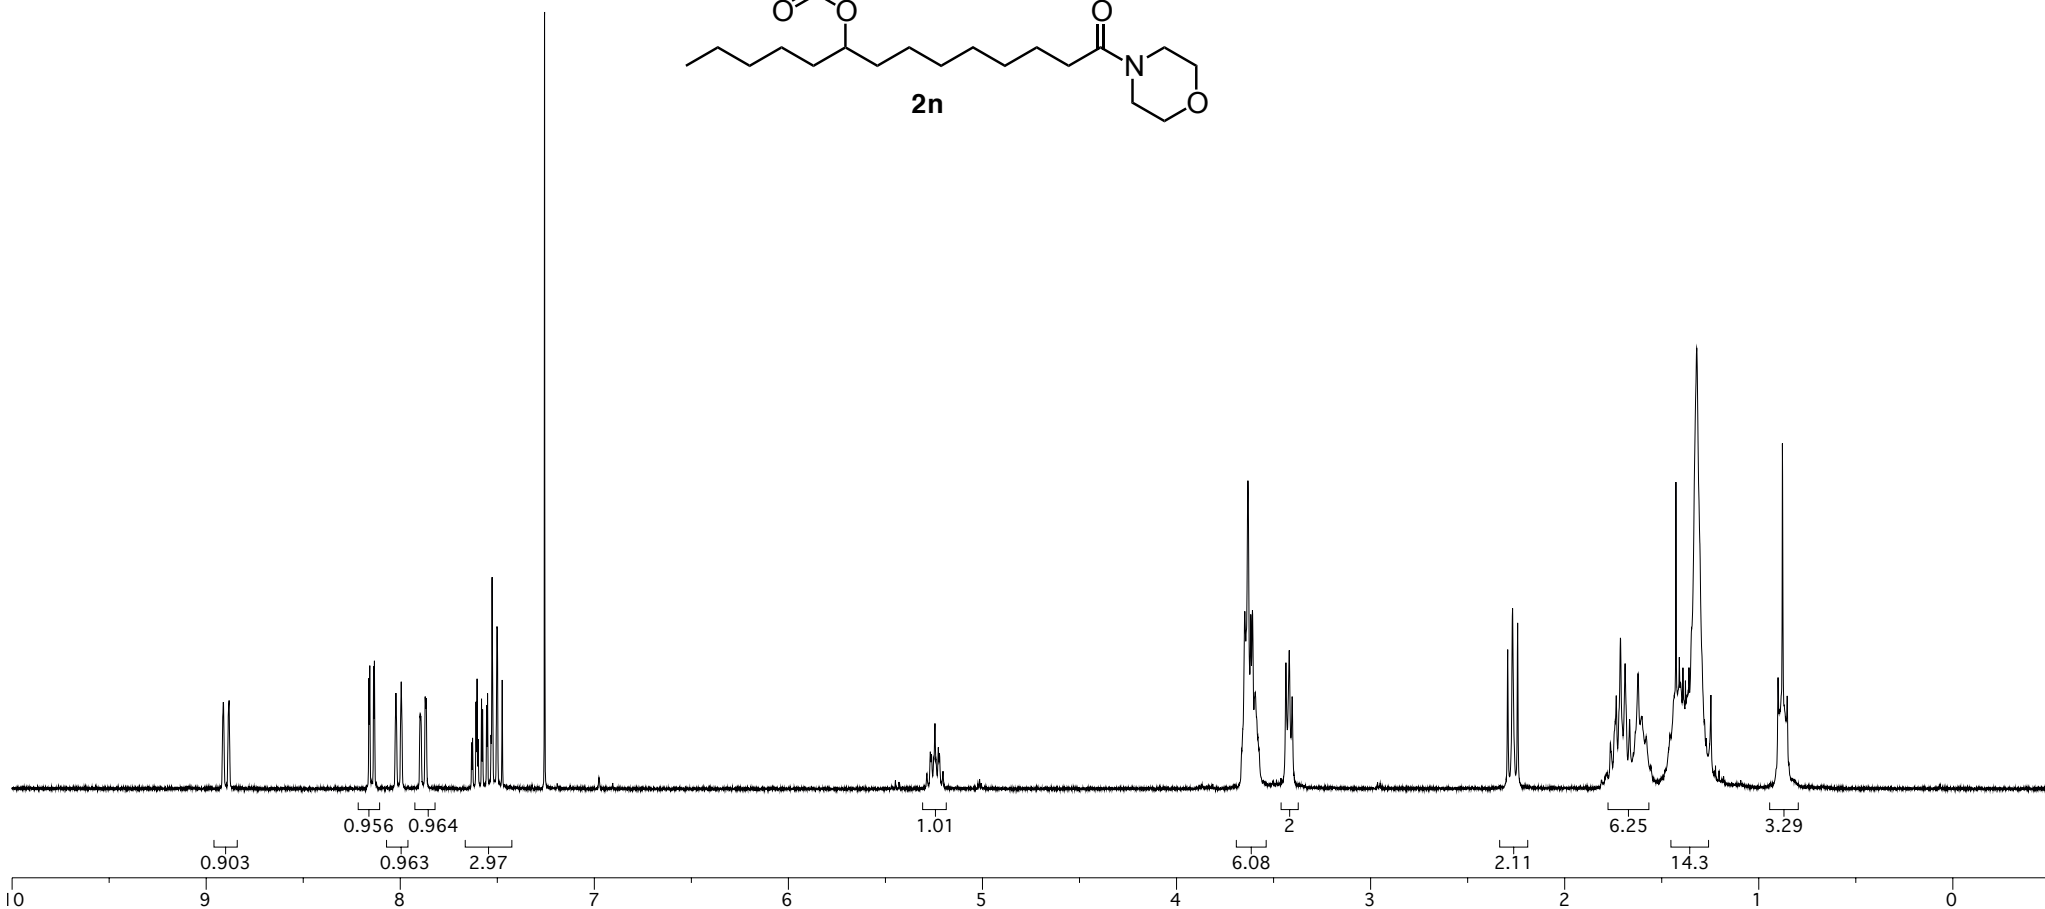

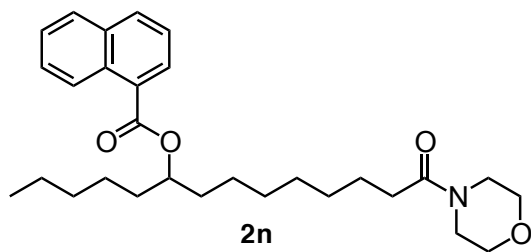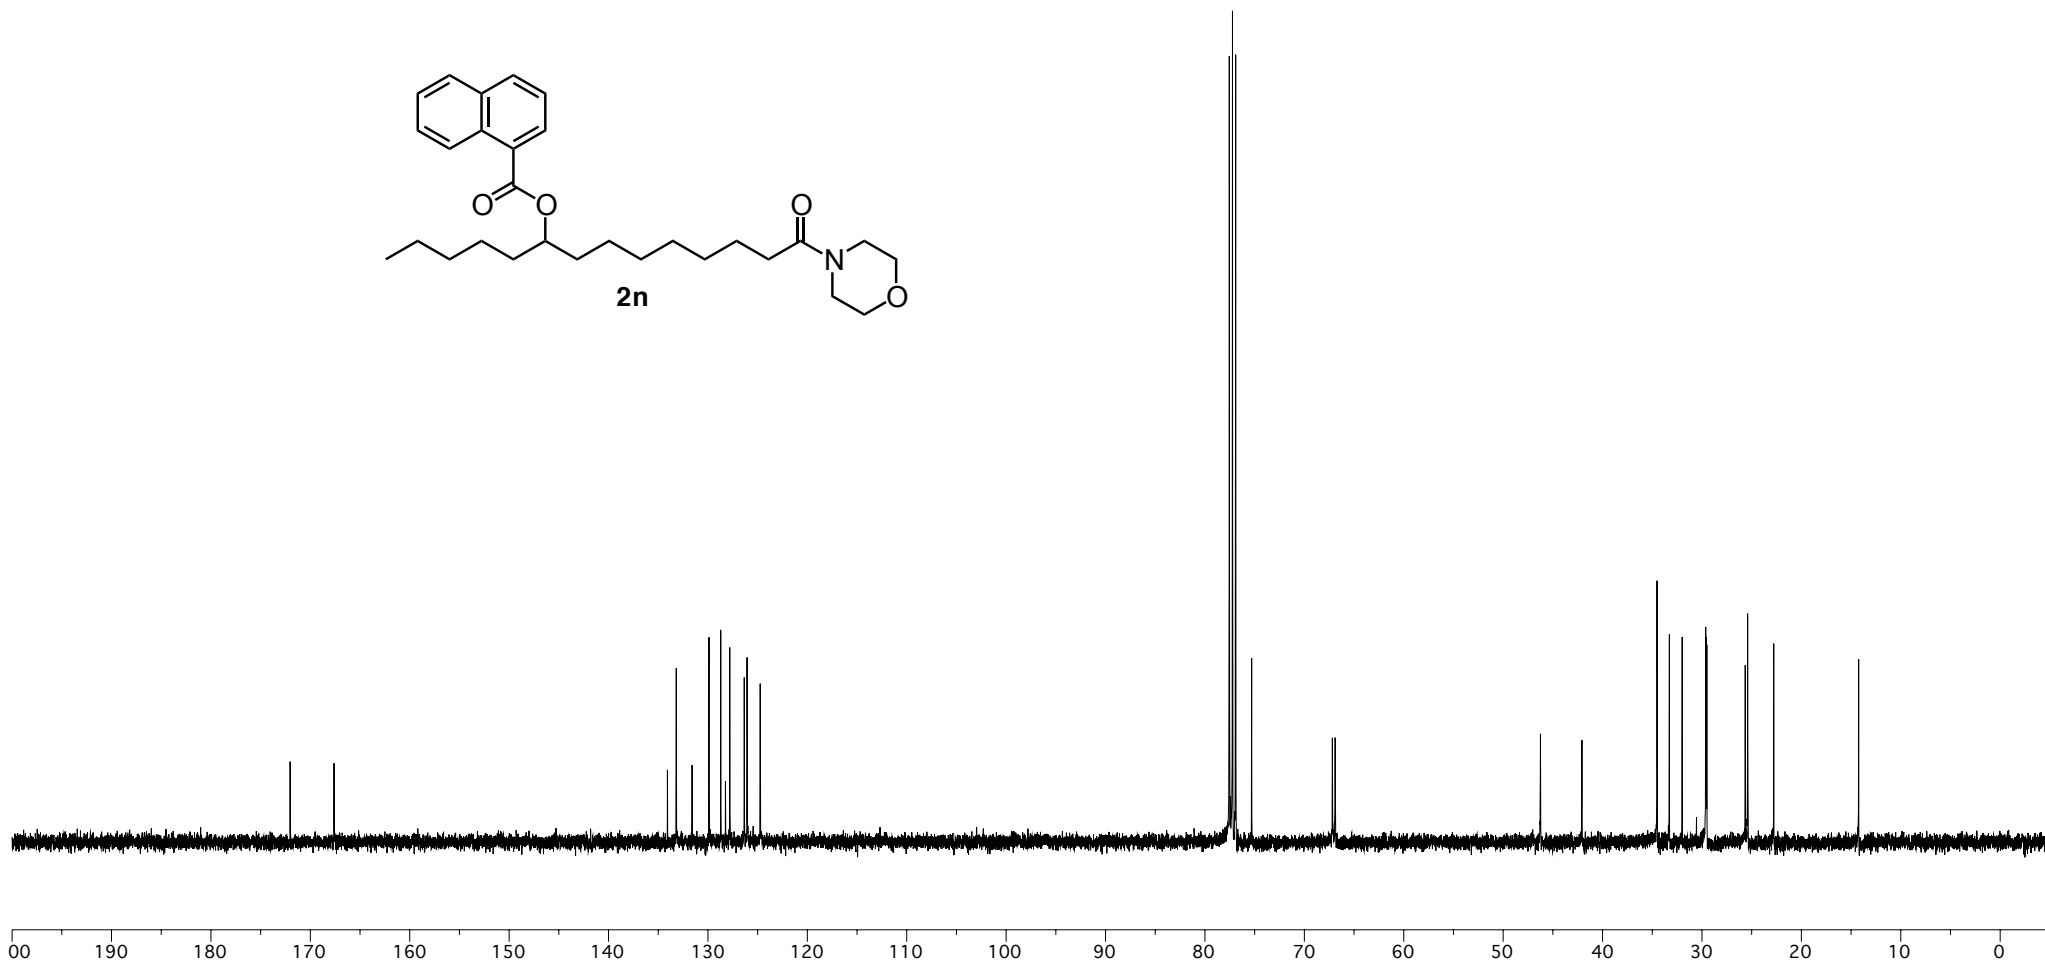

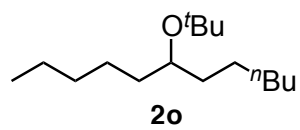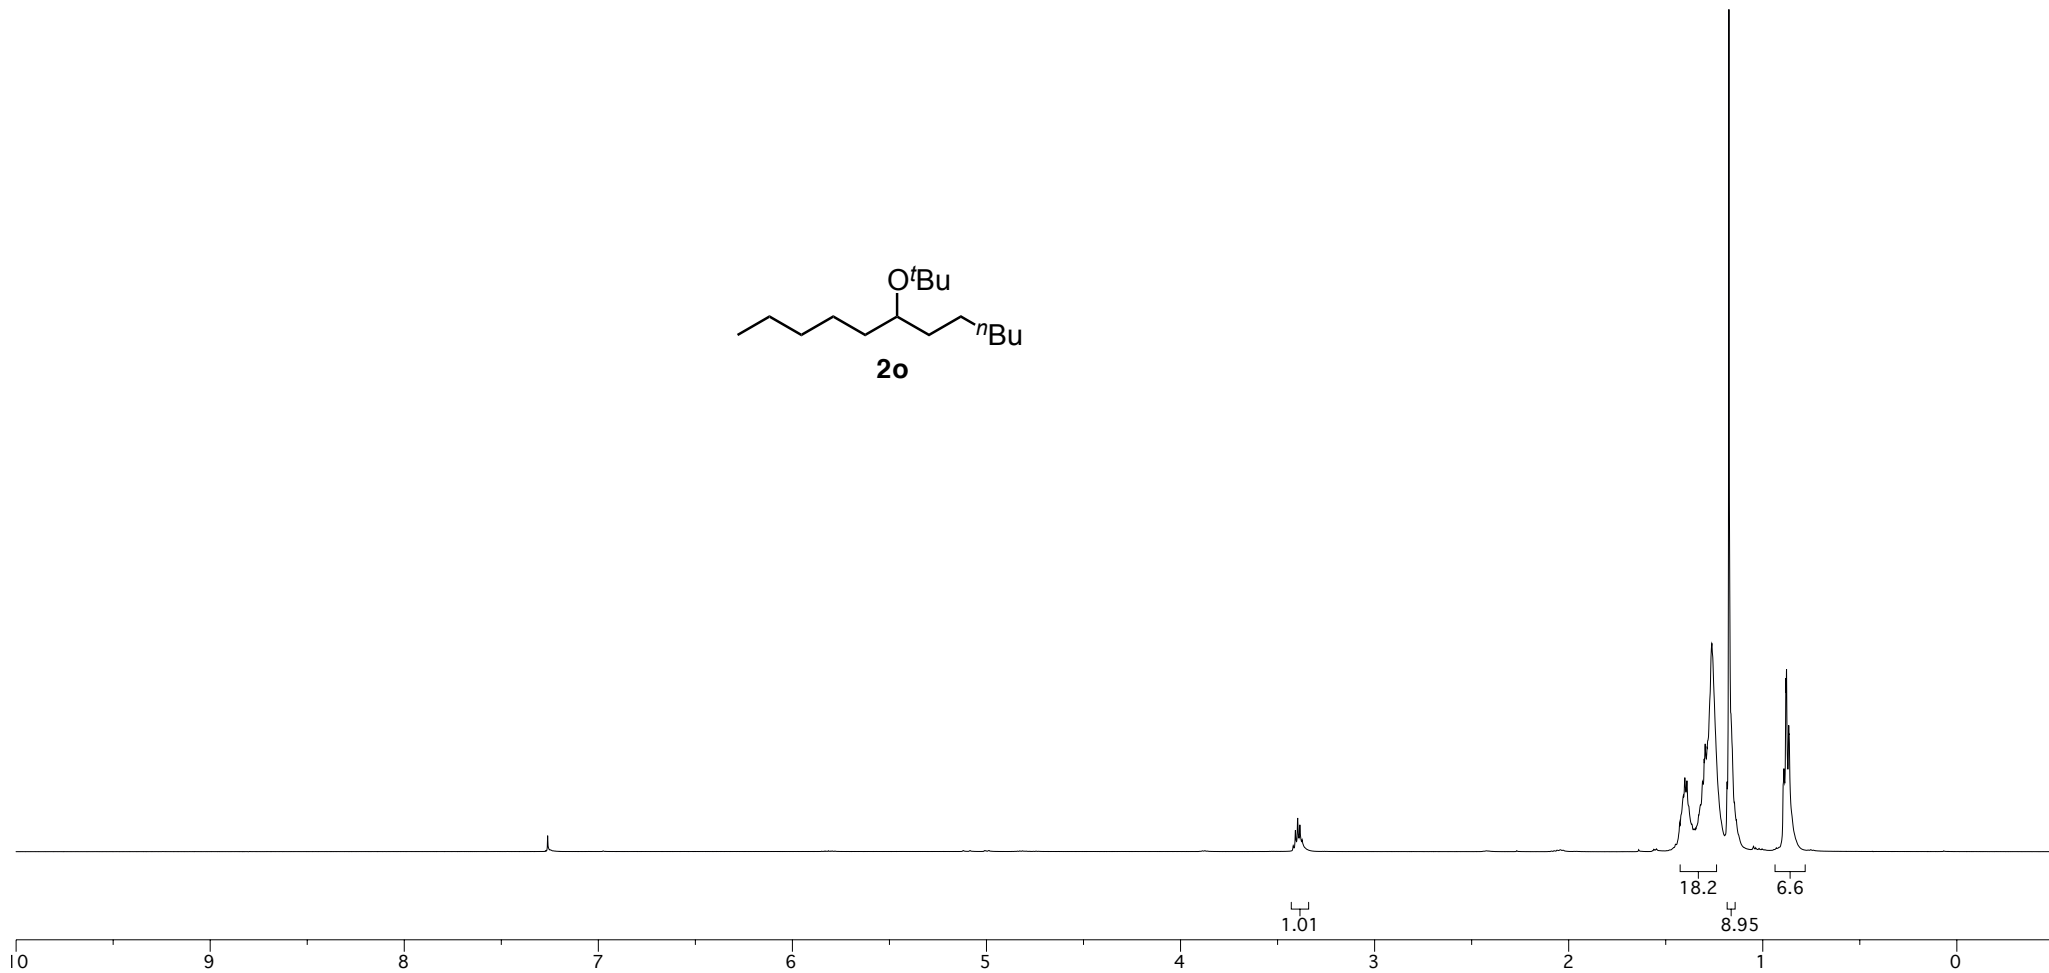



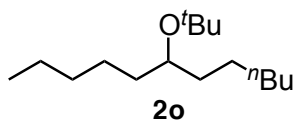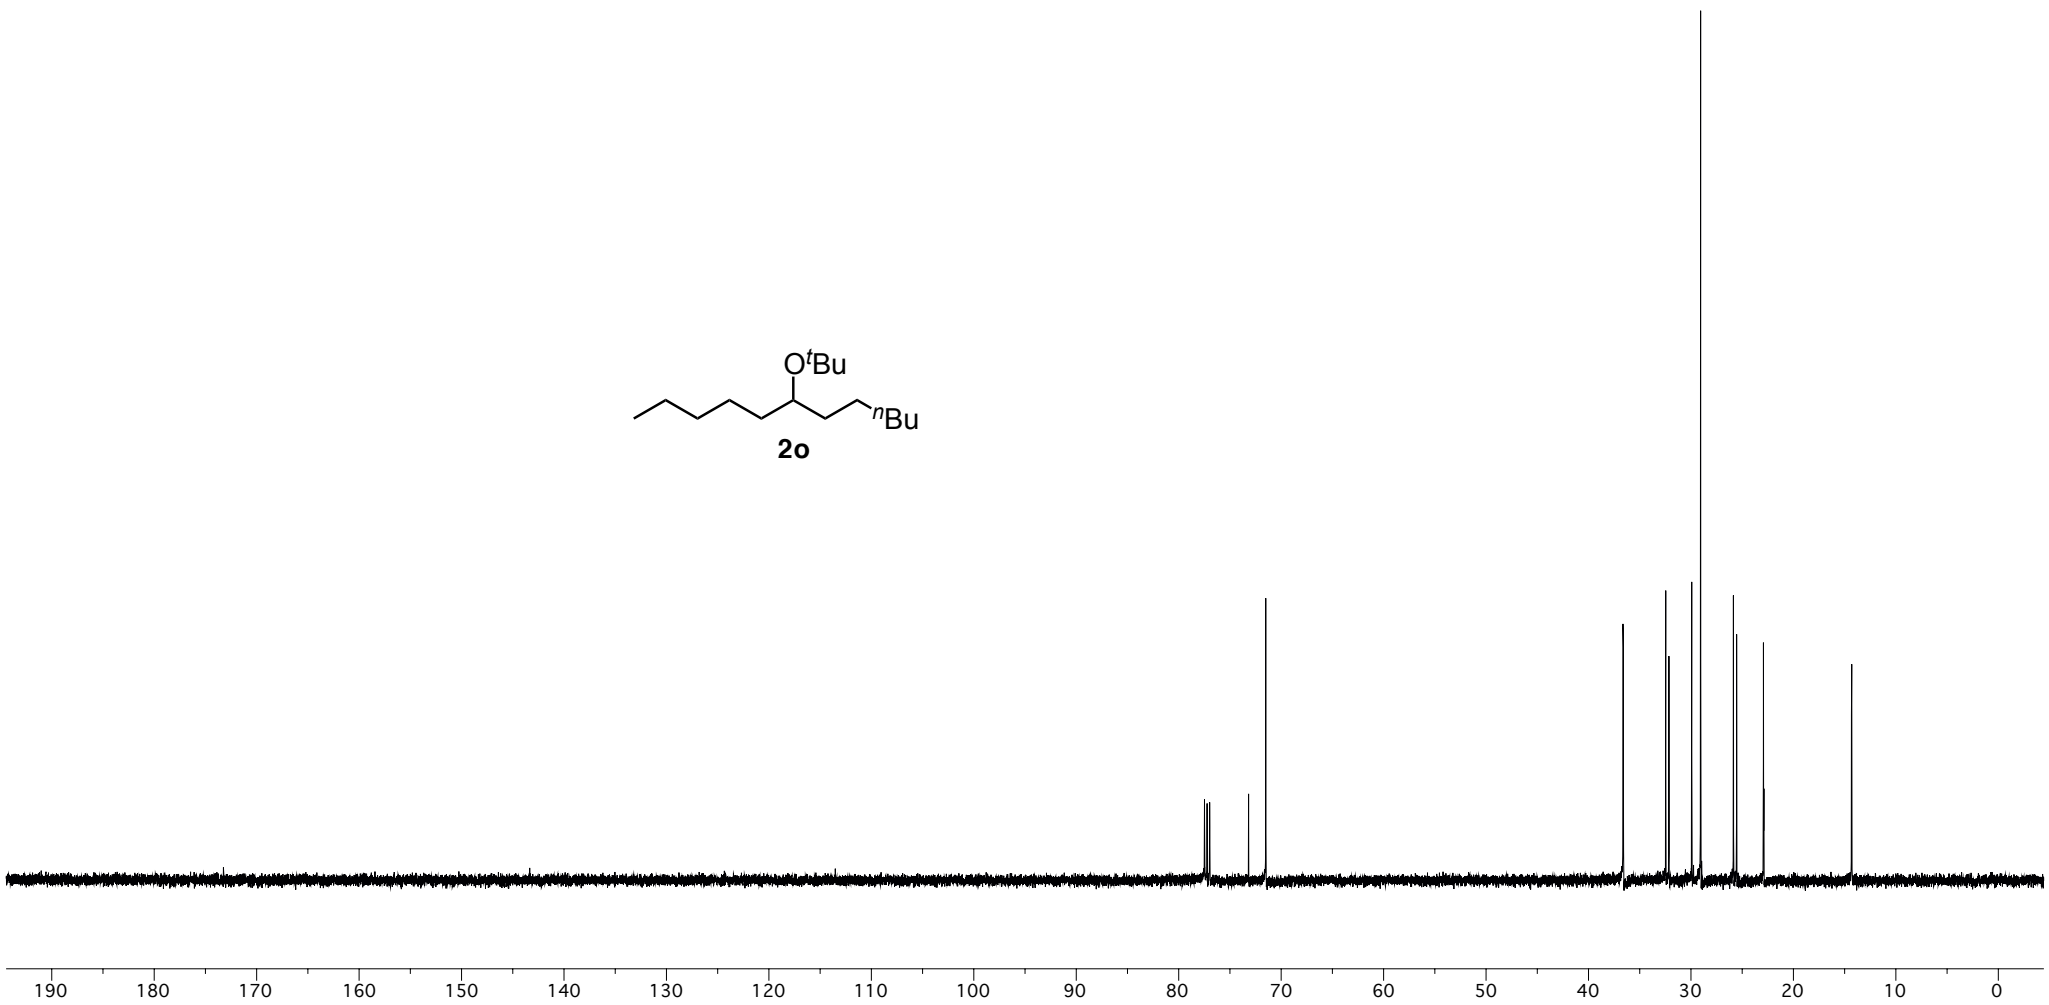

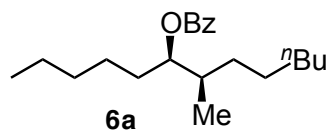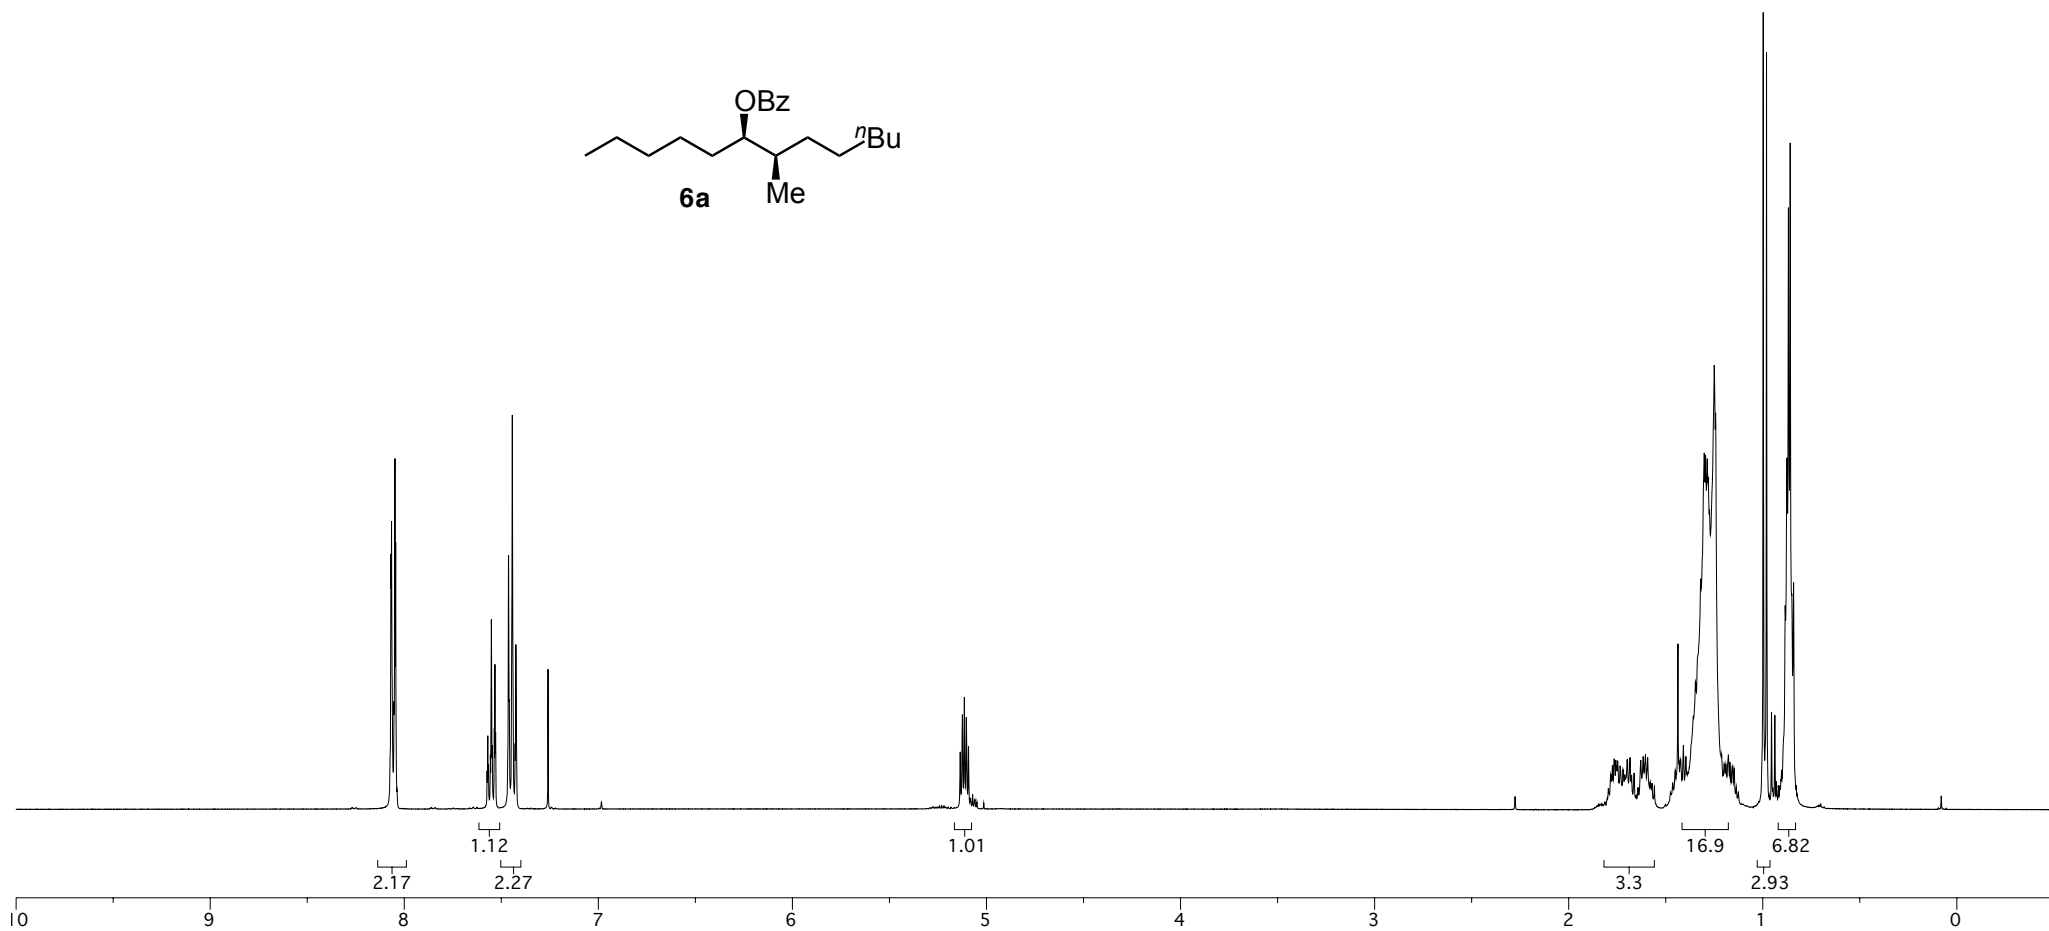

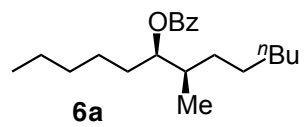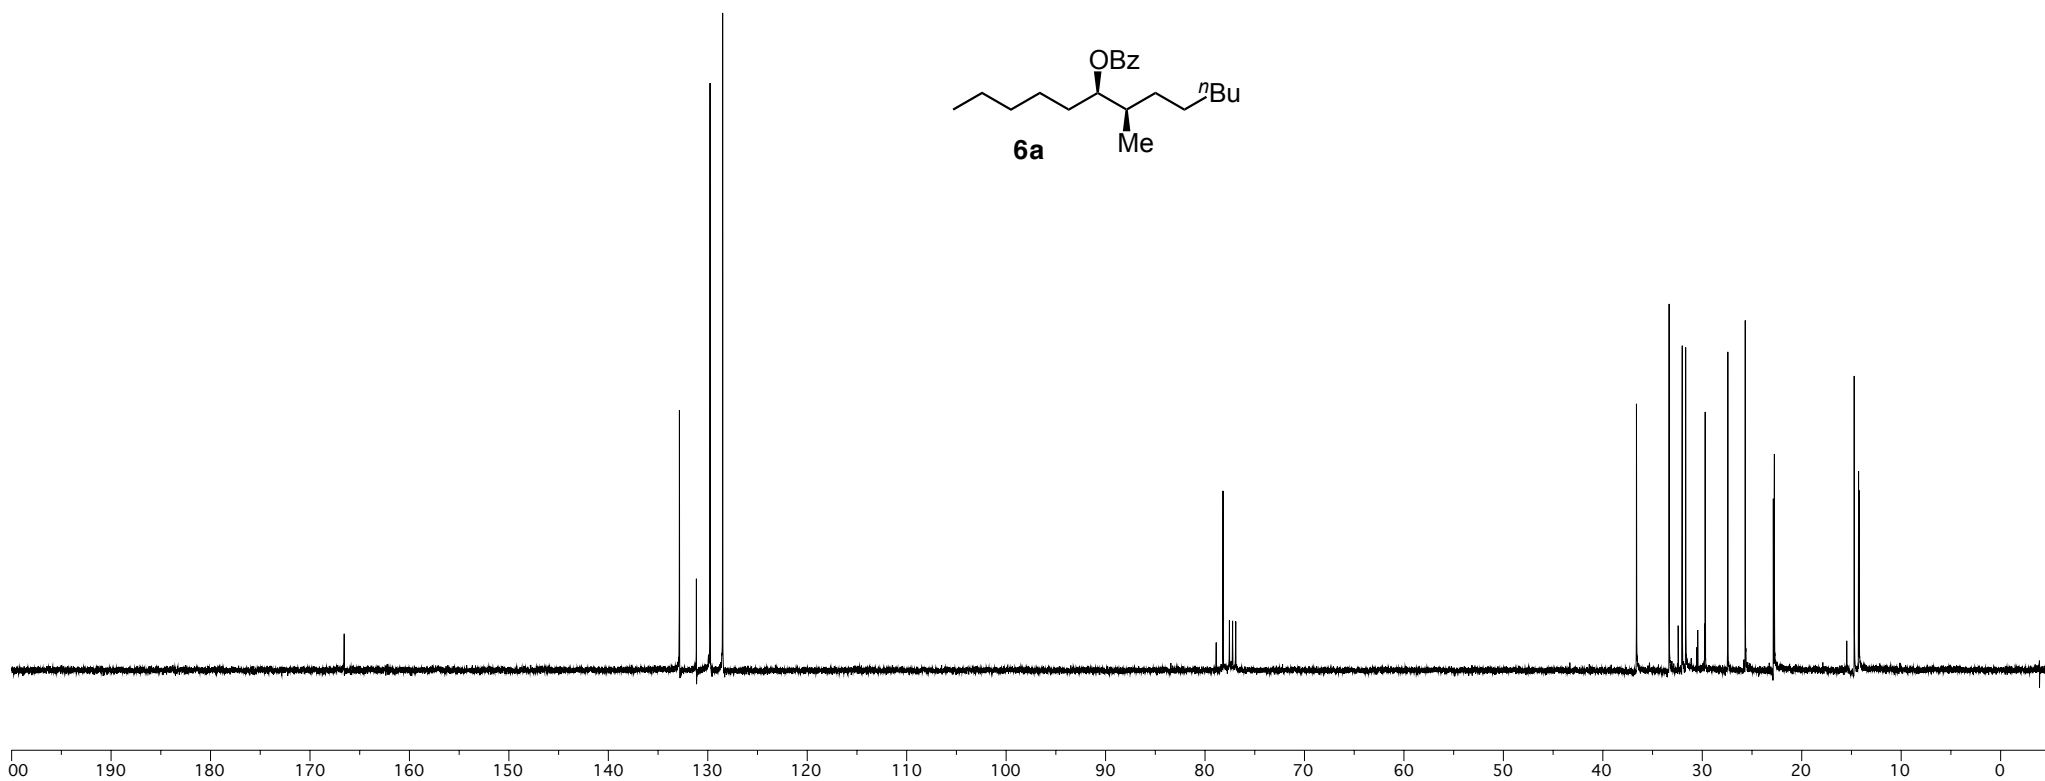

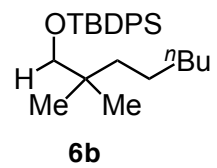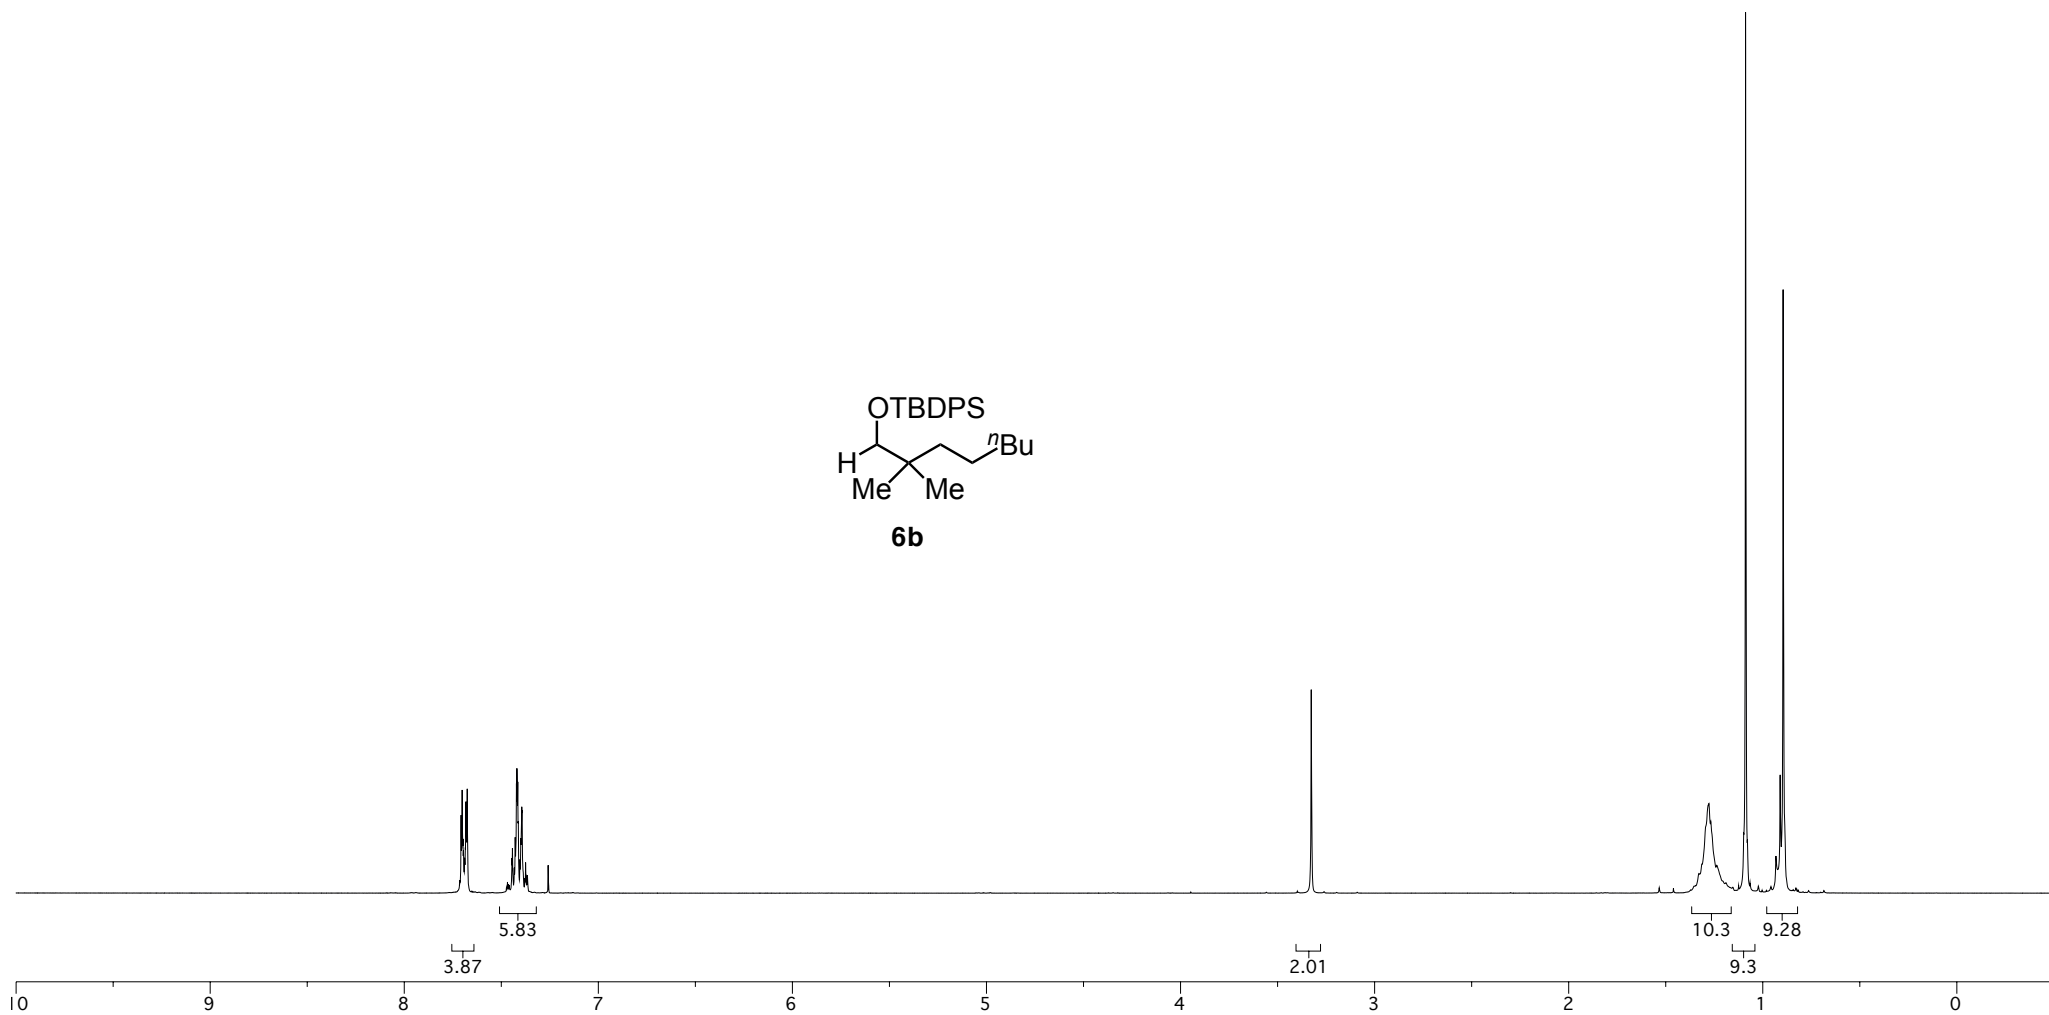

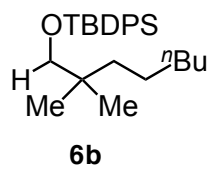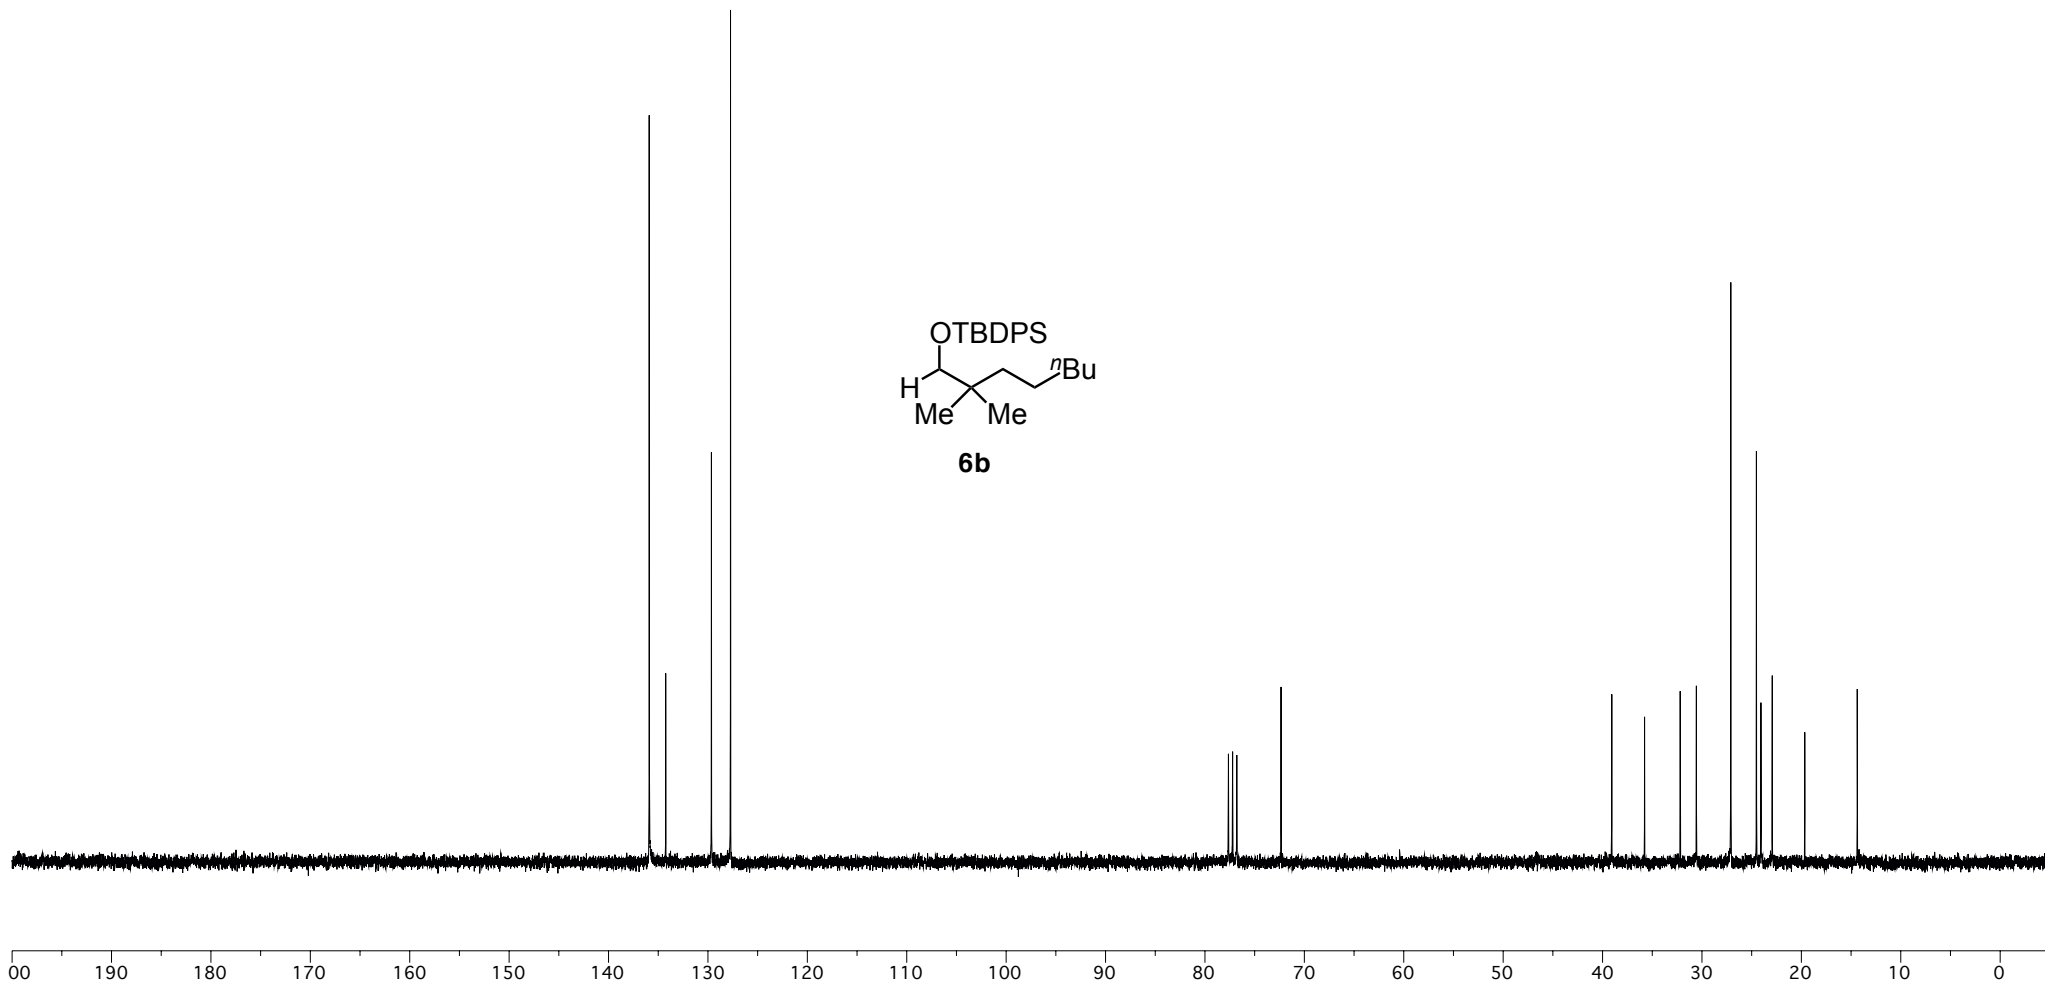

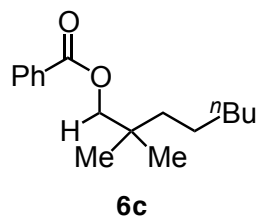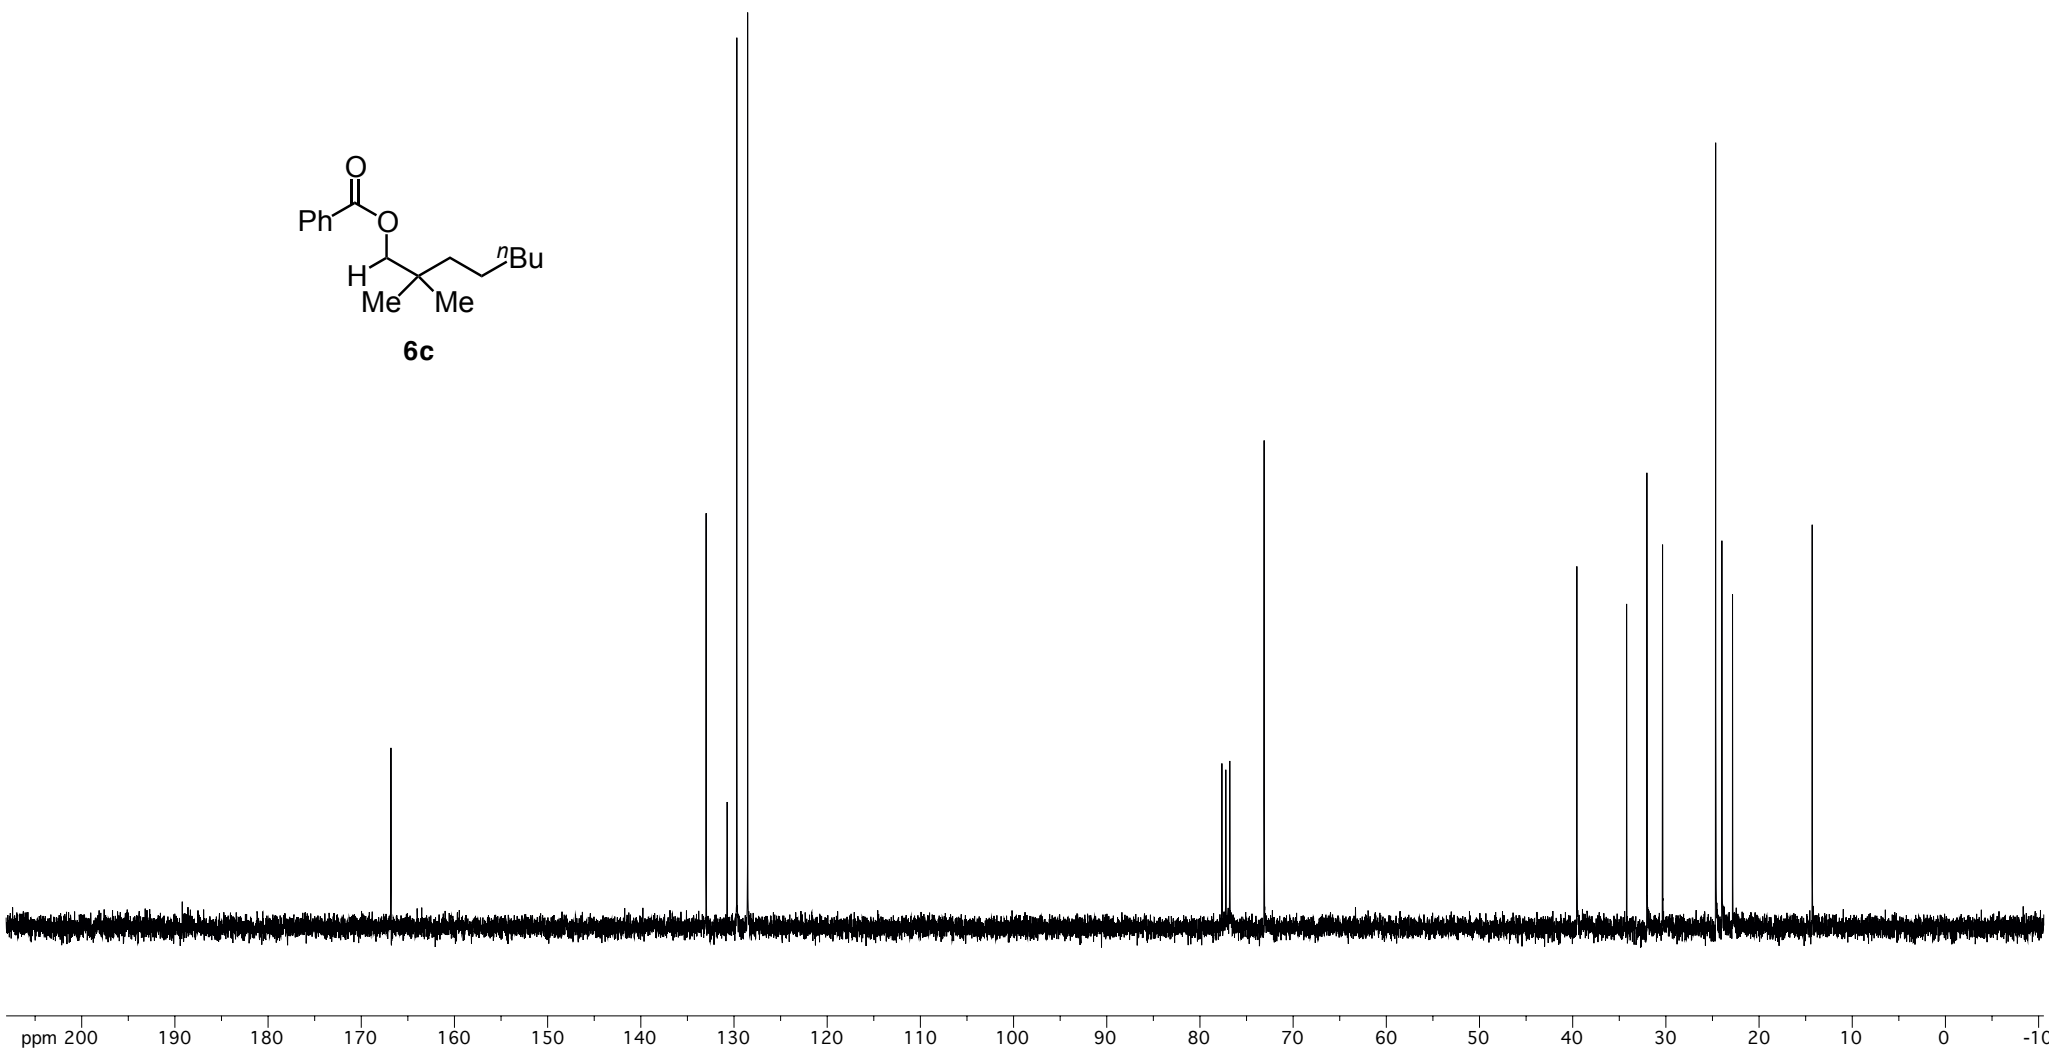

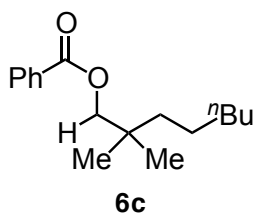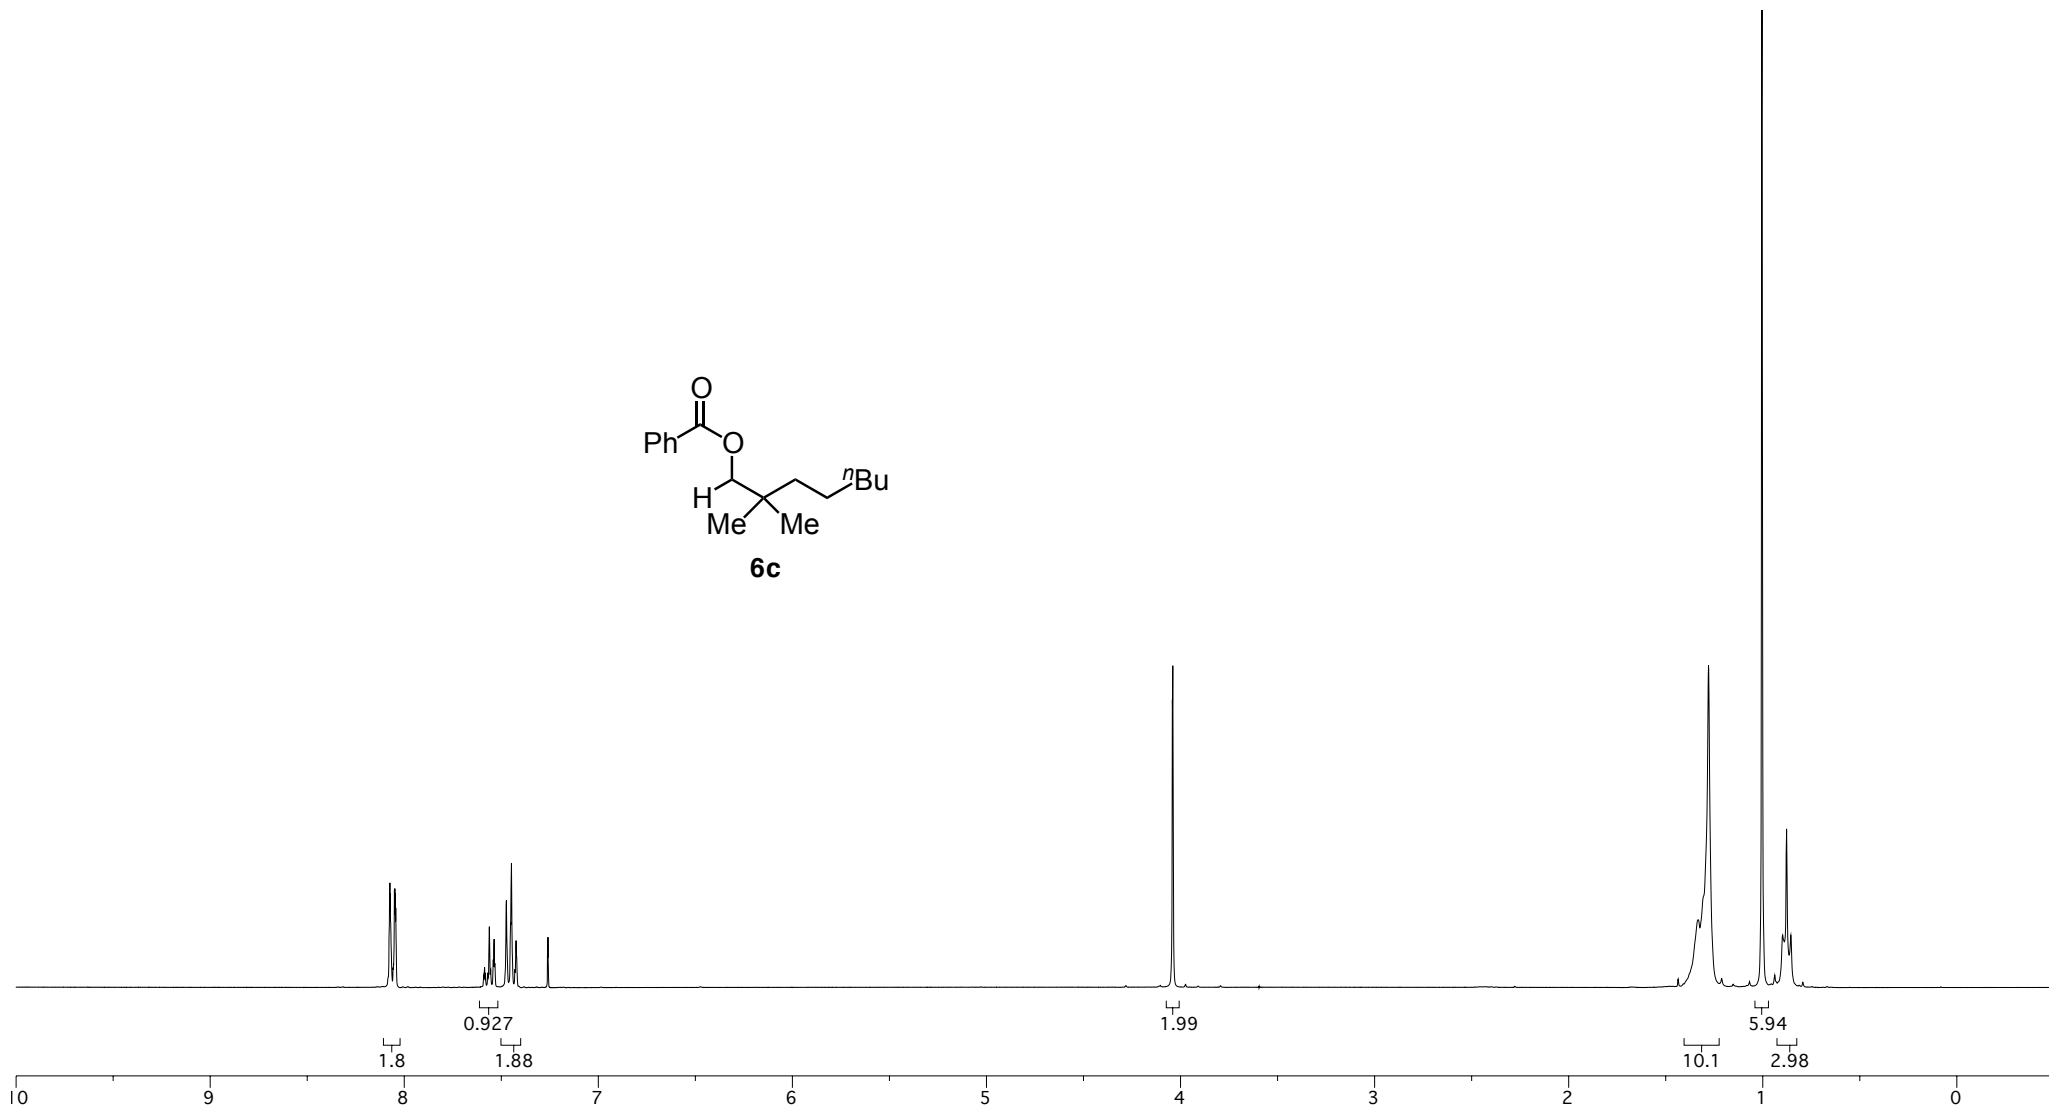

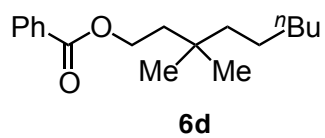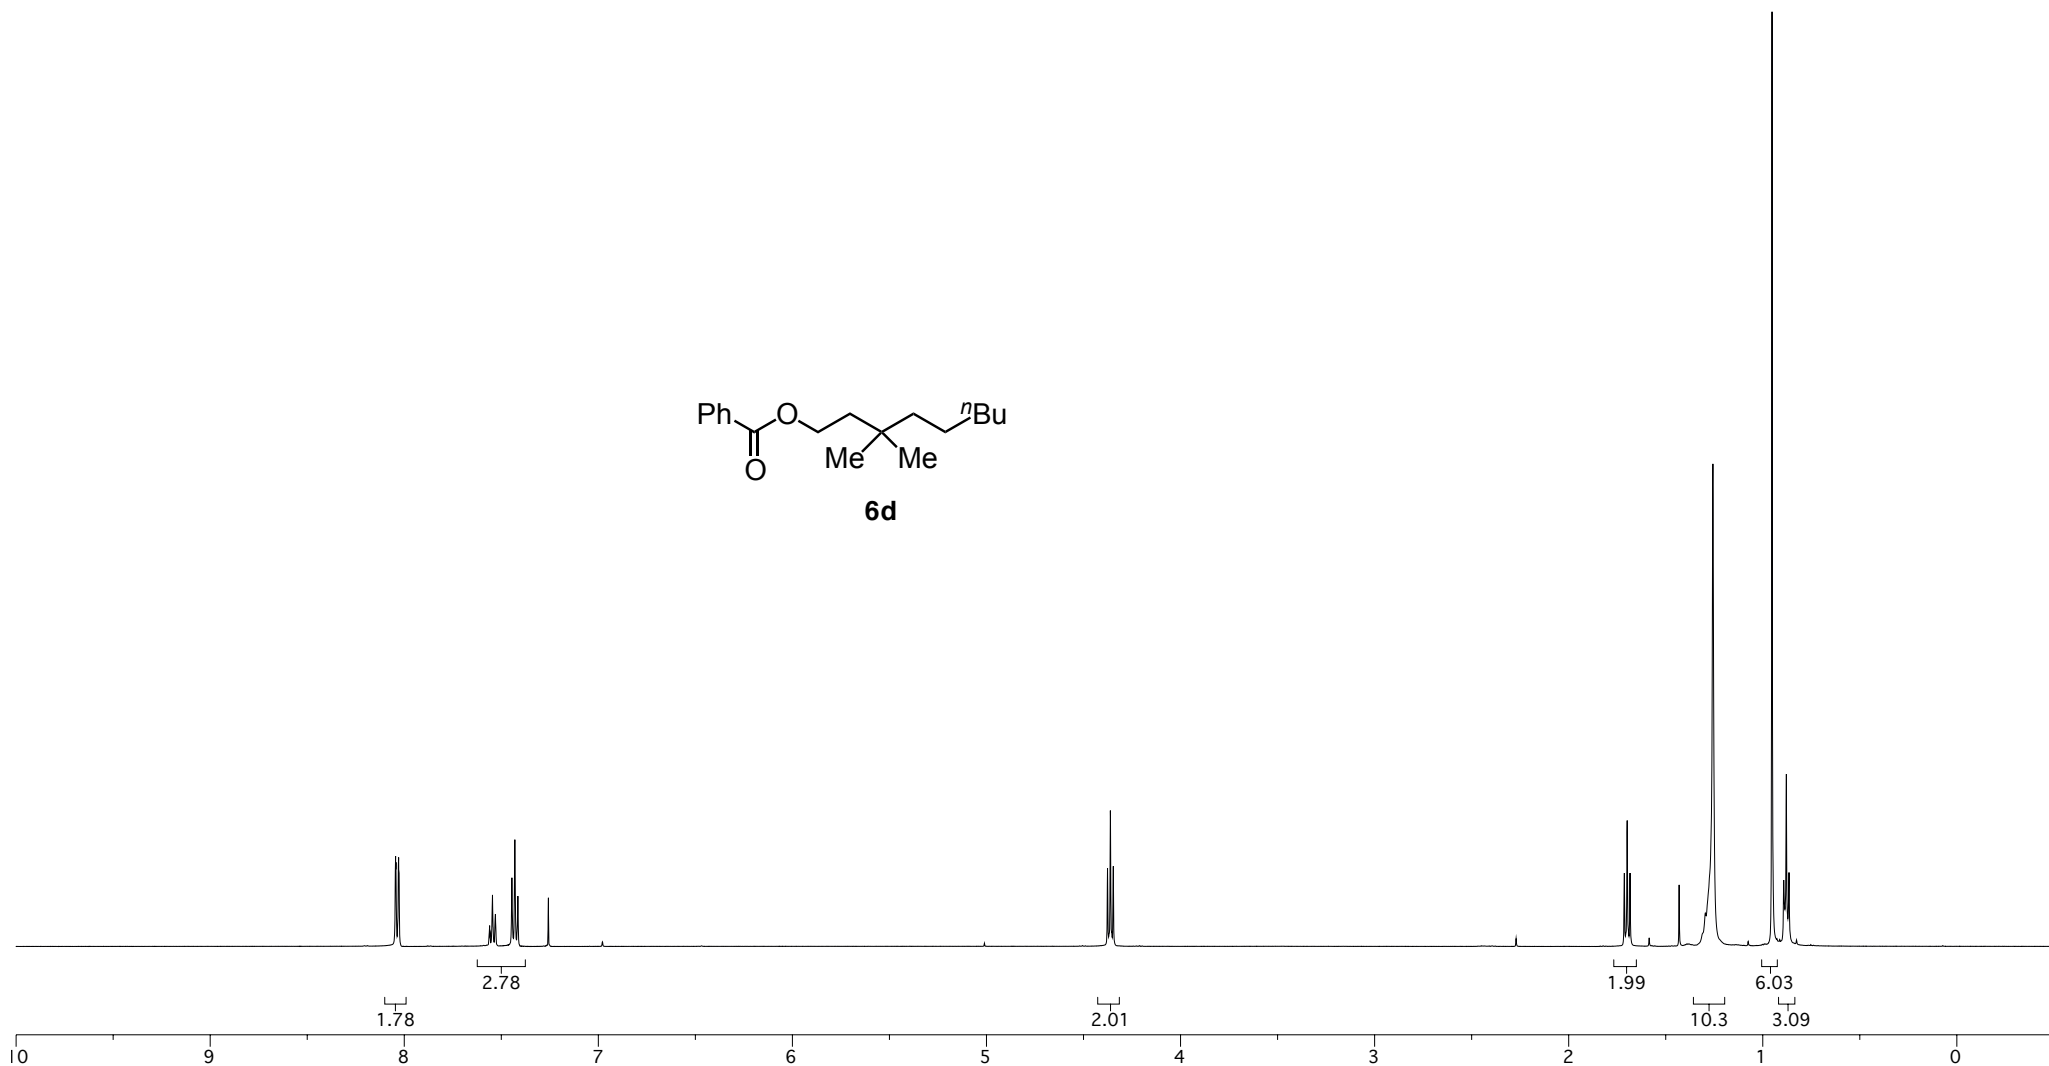



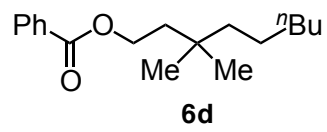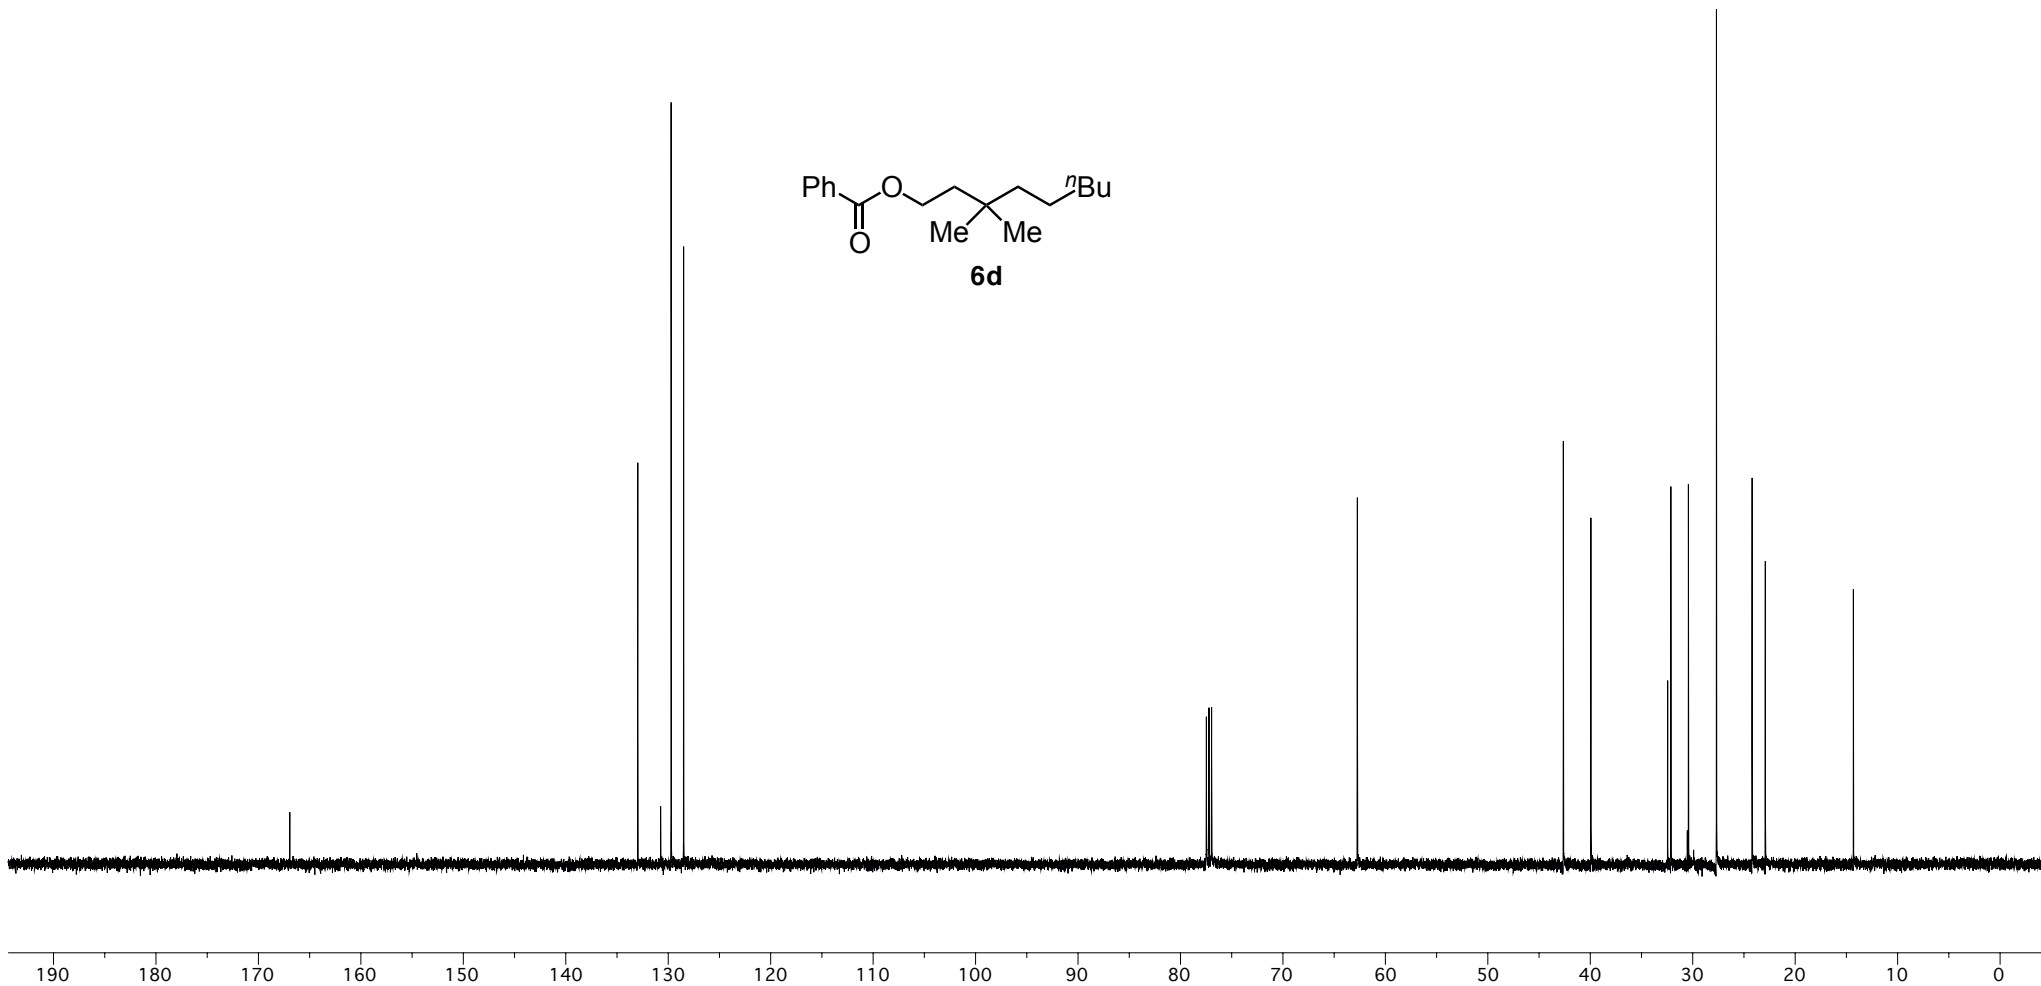

Supplement: NIHMS430733-supplement-1_si_001.pdf [file NIHMS430733-supplement-1_si_001.pdf]
